# Supplementary material for: Design, Synthesis and Biological Activity Testing of Library of Sphk1 Inhibitors
Source: MDPI journal article supplement (doi:10.3390/molecules27062020), 2022-03-21

# Design, Synthesis and Biological Activity Testing of Library of Sphk1 Inhibitors

Shuangshuang Geng<sup>a#</sup>, Haijiao Chen<sup>a#</sup>, Yan Li<sup>a</sup>, Ying Li<sup>a</sup>, Jingxiang Pang<sup>b</sup>, Feipeng Zhang<sup>a</sup>, Zhiqiang Qu<sup>a</sup>, Mengjun Li<sup>a</sup>, Na Liu<sup>a</sup>, Qingqiang Yao<sup>a</sup>, Yanling Mu<sup>a\*</sup>, and Bo Liu<sup>a\*</sup>

<sup>a</sup> Institute of Materia Medica, Shandong First Medical University & Shandong Academy of Medical Sciences, Jinan 250117, Shandong, P. R. China

<sup>b</sup> Biomedical Sciences College & Shandong Medicinal Biotechnology Centre, Shandong First Medical University & Shandong Academy of Medical Sciences, Jinan 250117, Shandong, P. R. China

\*Email: muyanling@sdfmu.edu.cn;

\*Email: mls\_liub@ujn.edu.cn

#S.G. and H.C. contributed equally to this paper.

## Table of Contents

1. The structures of phenoxy-2,3-epoxypropane compounds (6)
2. Copies of NMR (<sup>1</sup>H and <sup>13</sup>C) spectra for Compounds **5** and **CHJ** series compounds.

### 1. The structures of phenoxy-2,3-epoxypropane compounds (6)

**Table S1. The structures of phenoxy-2,3-epoxypropane compounds (6)**

| Code       | Structure | Code        | Structure | Code        | Structure |
|------------|-----------|-------------|-----------|-------------|-----------|
| <b>6-1</b> |           | <b>6-14</b> |           | <b>6-27</b> |           |
| <b>6-2</b> |           | <b>6-15</b> |           | <b>6-28</b> |           |
| <b>6-3</b> |           | <b>6-16</b> |           | <b>6-29</b> |           |
| <b>6-4</b> |           | <b>6-17</b> |           | <b>6-30</b> |           |

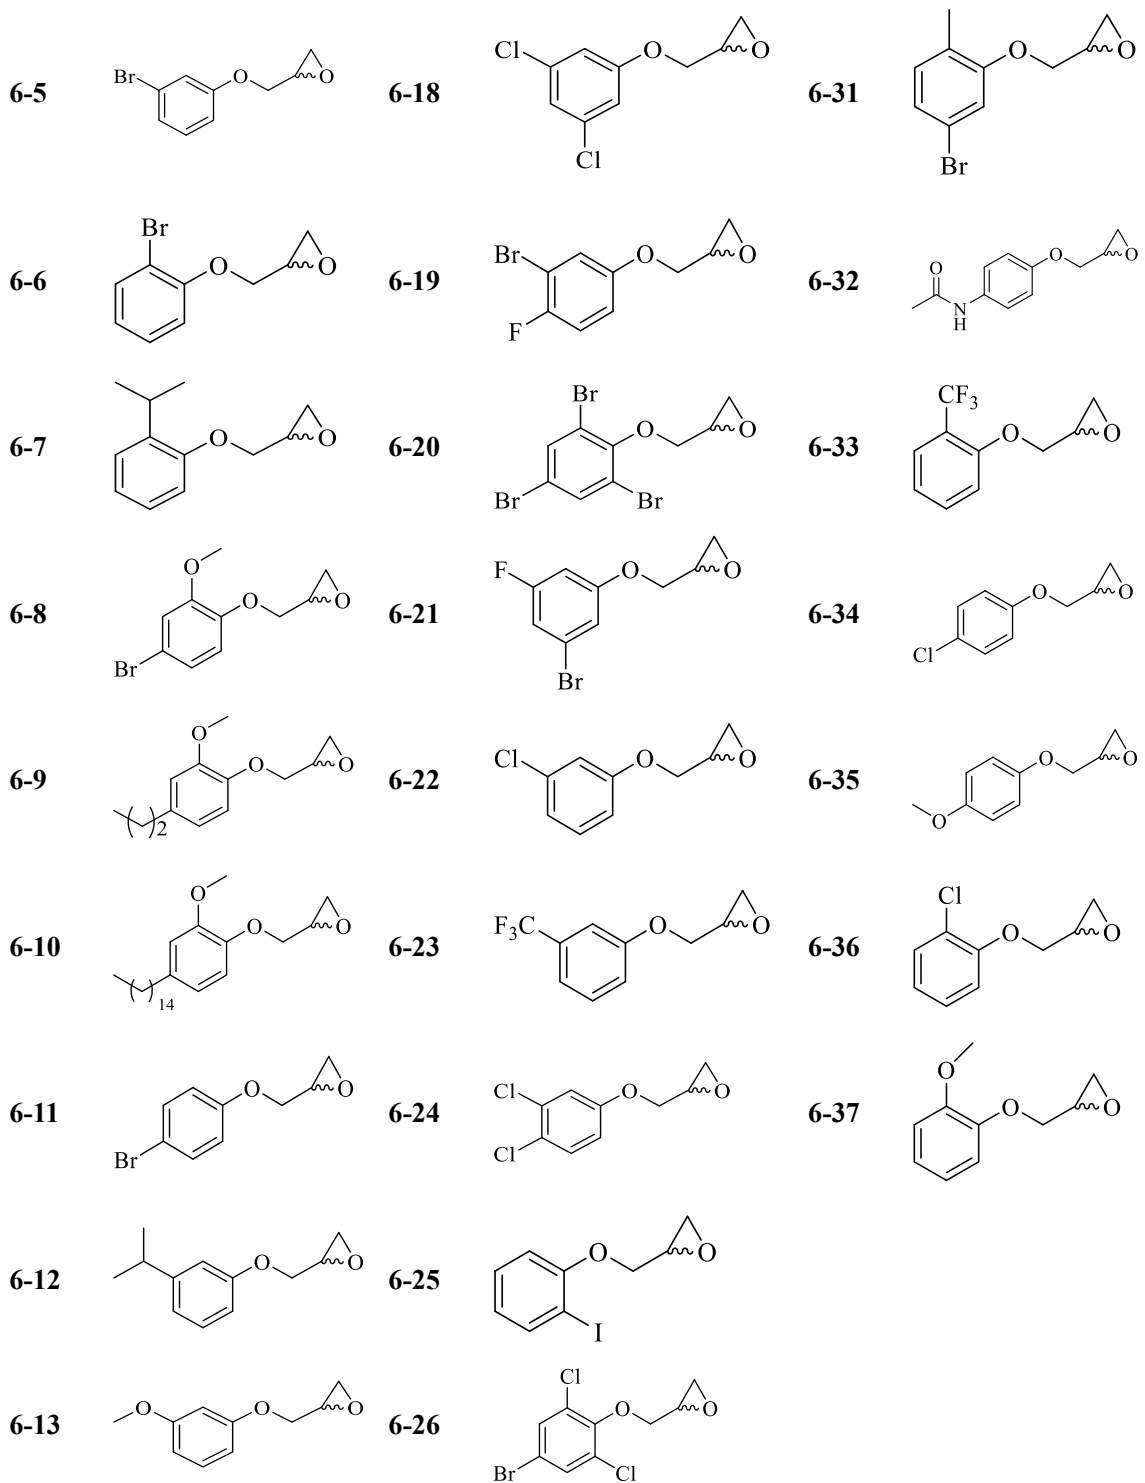

## 2. Copies of NMR ( $^1\text{H}$ and $^{13}\text{C}$ ) Compounds

# Copies of NMR (<sup>1</sup>H and <sup>13</sup>C) of Compound 5-1

LB01028. 1. f1d

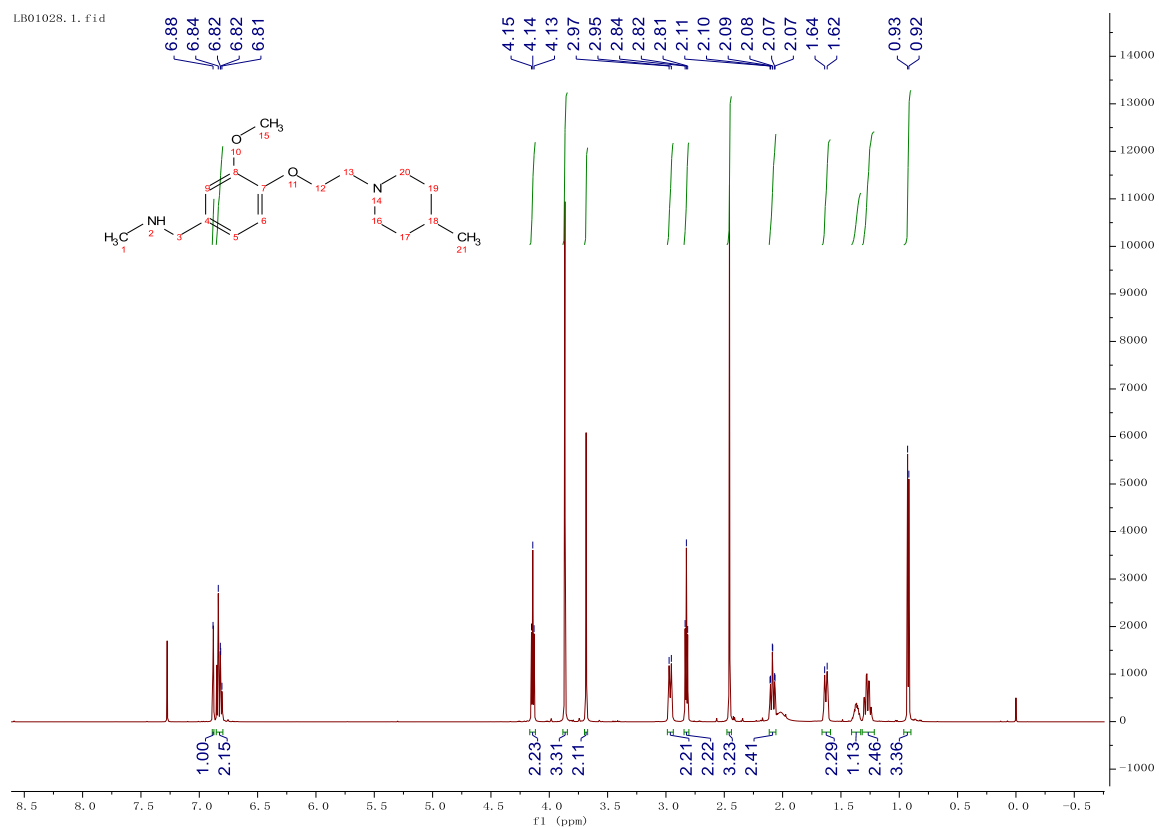

CHJ01. 2. f1d

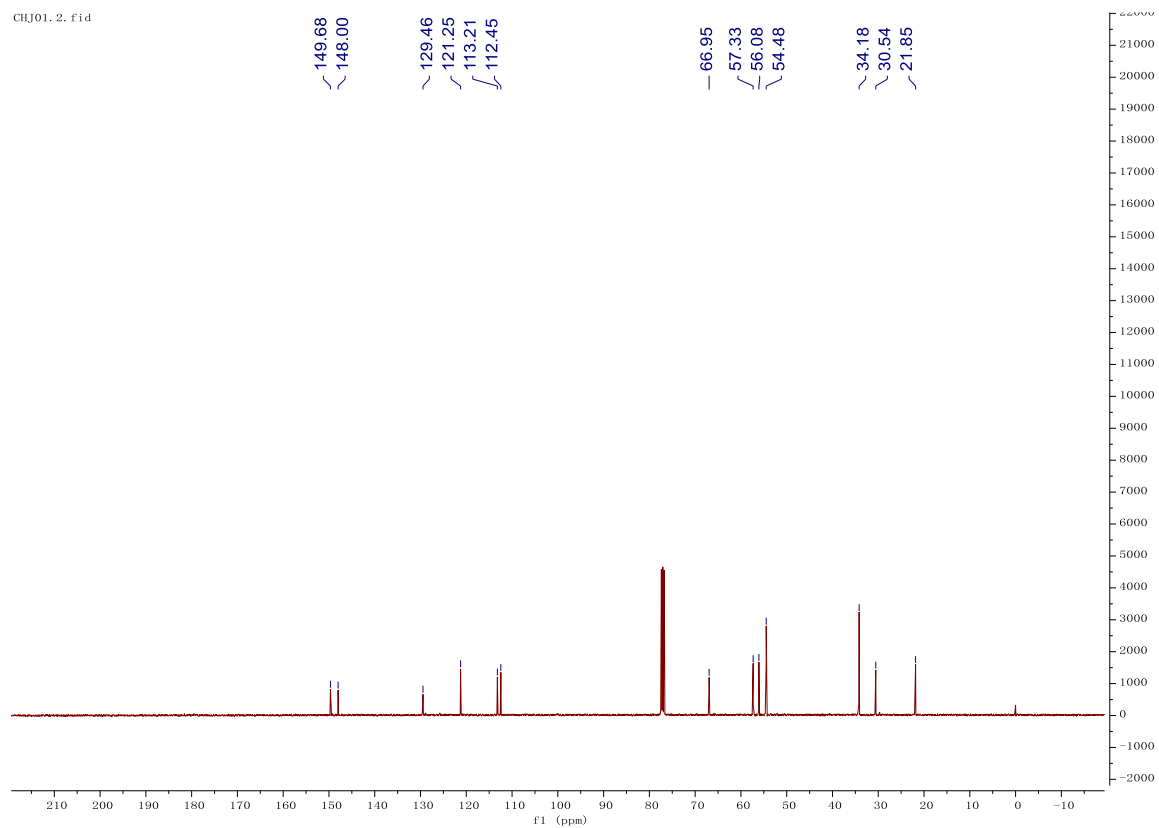

# Copies of NMR (<sup>1</sup>H and <sup>13</sup>C) of Compound 5-2

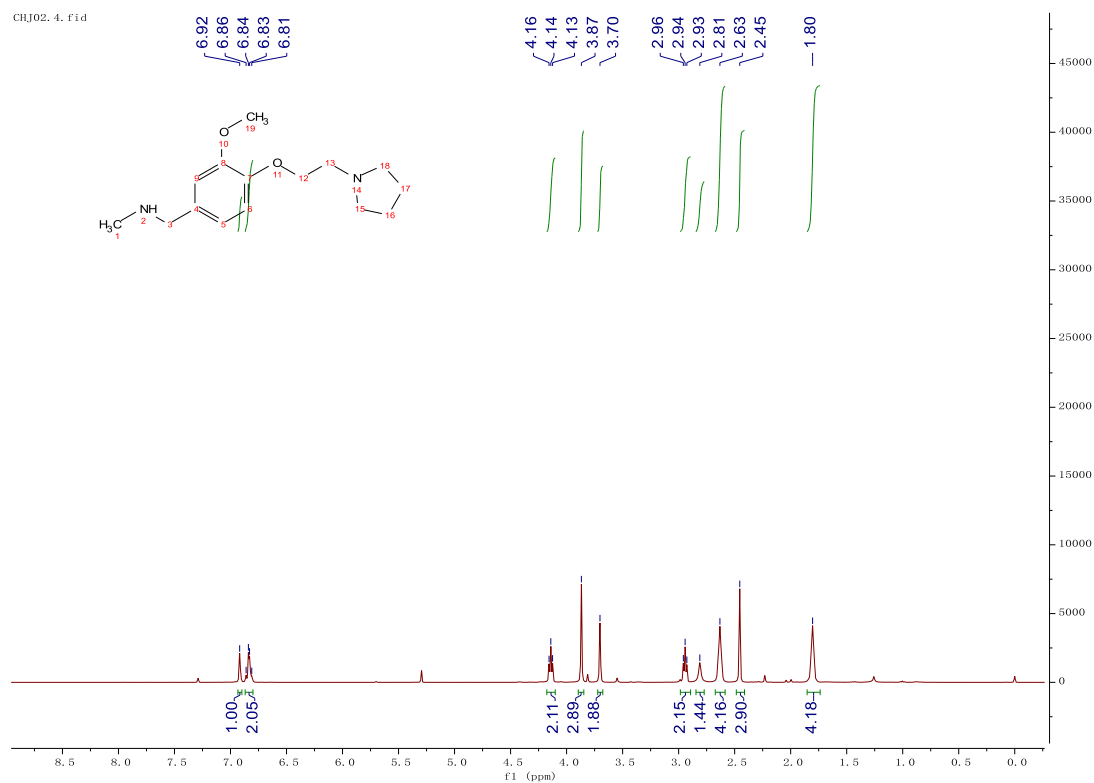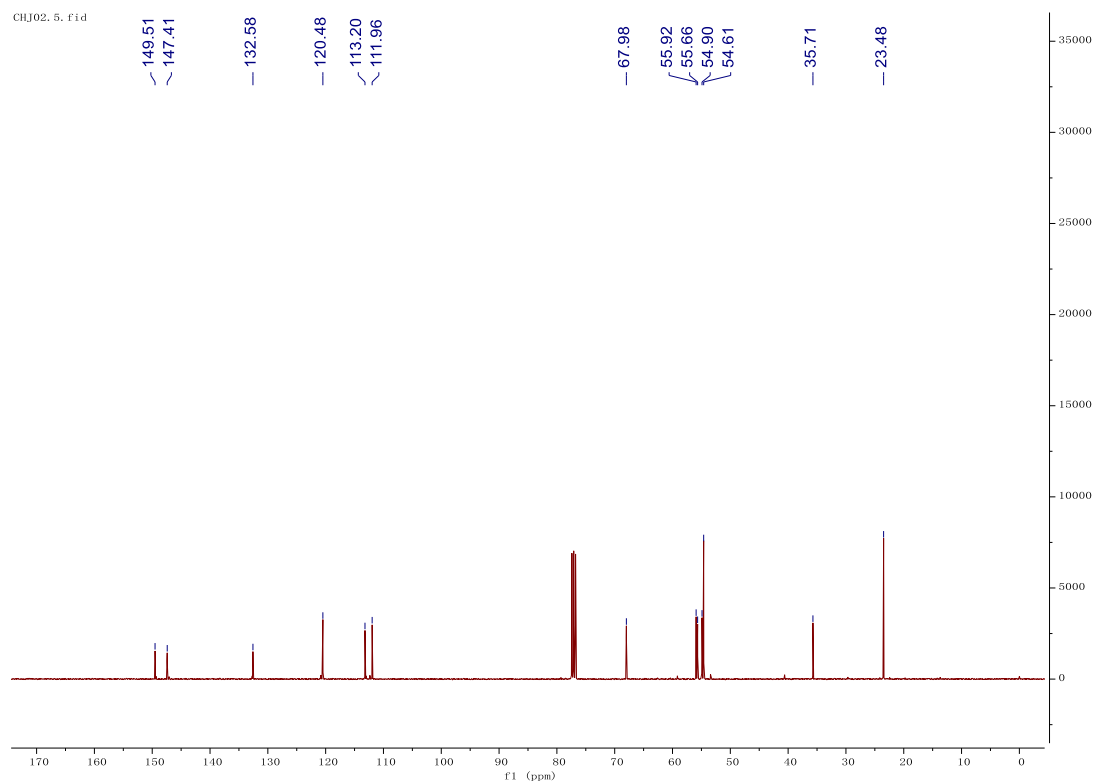



# Copies of NMR (<sup>1</sup>H and <sup>13</sup>C) of Compound 5-3

CHJ03. 2. fid

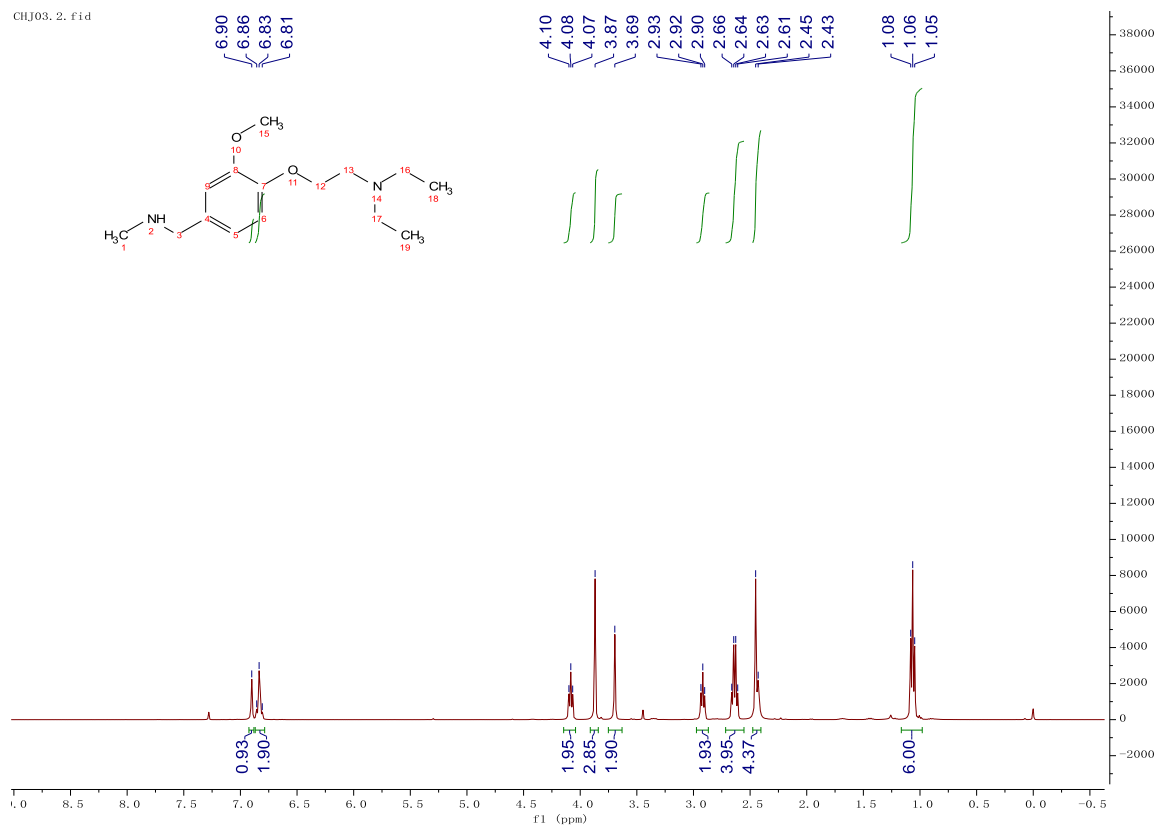

CHJ03. 4. fid

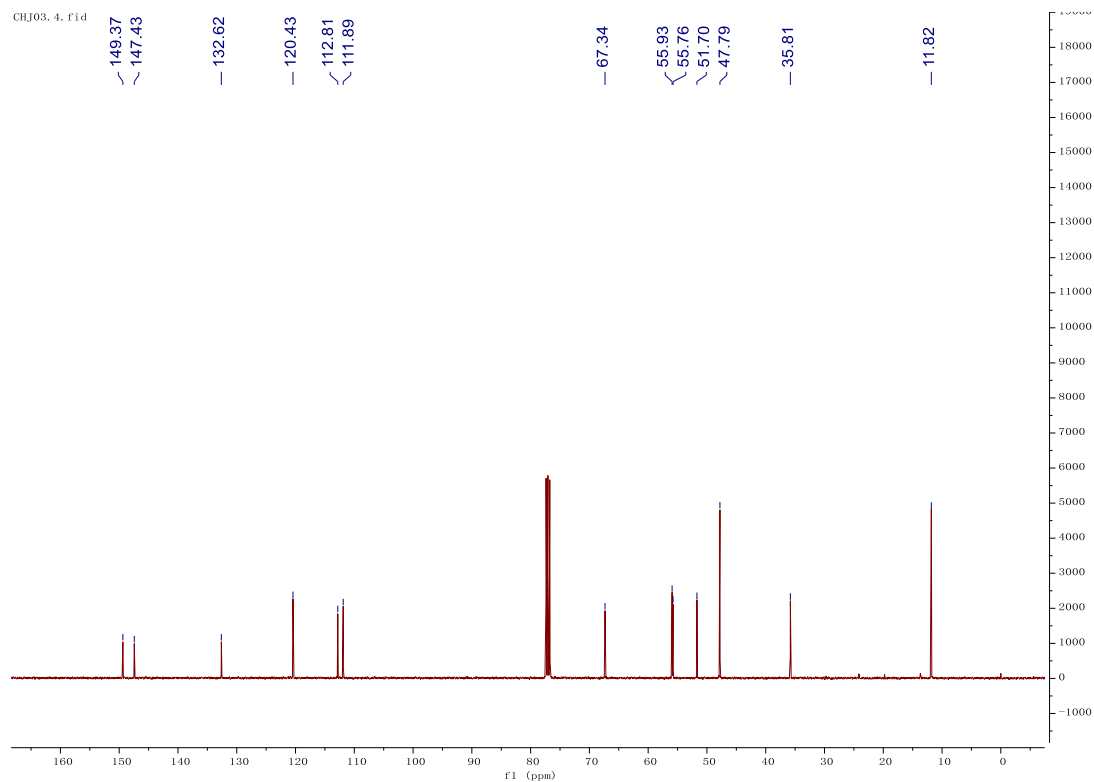

# Copies of NMR (<sup>1</sup>H and <sup>13</sup>C) of Compound 5-4

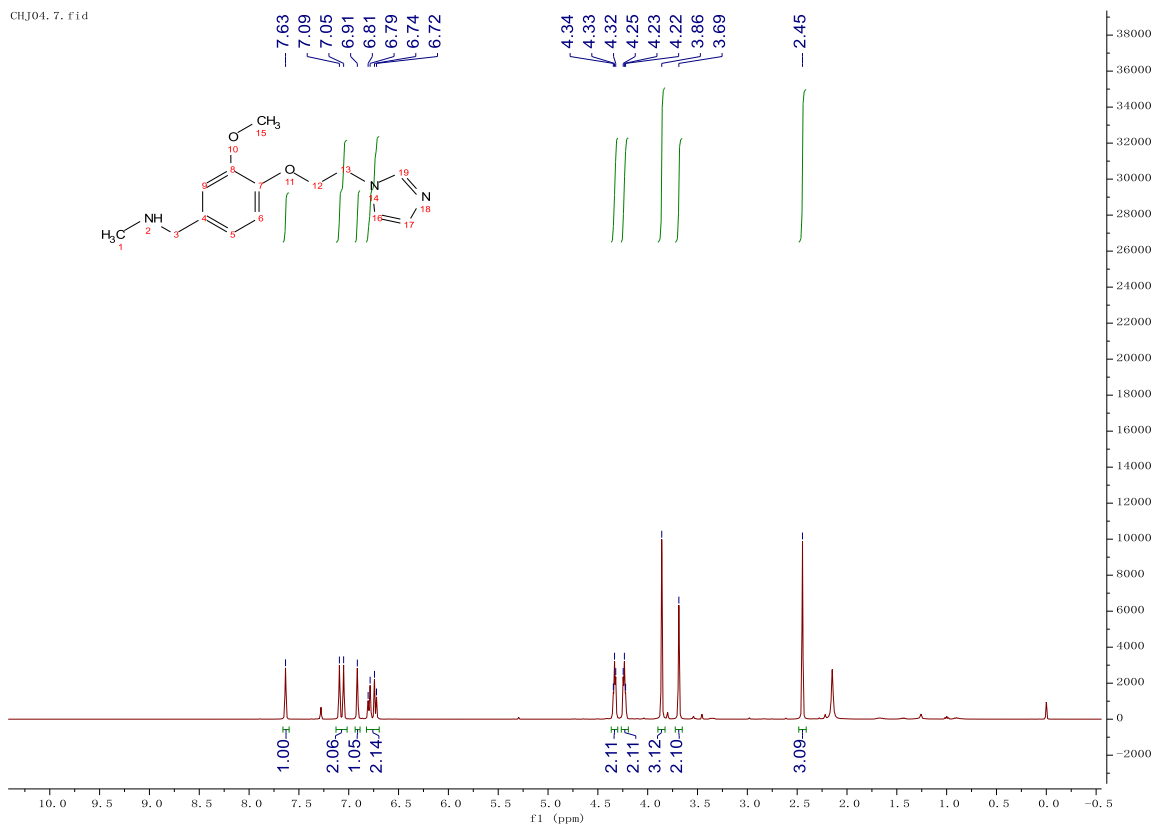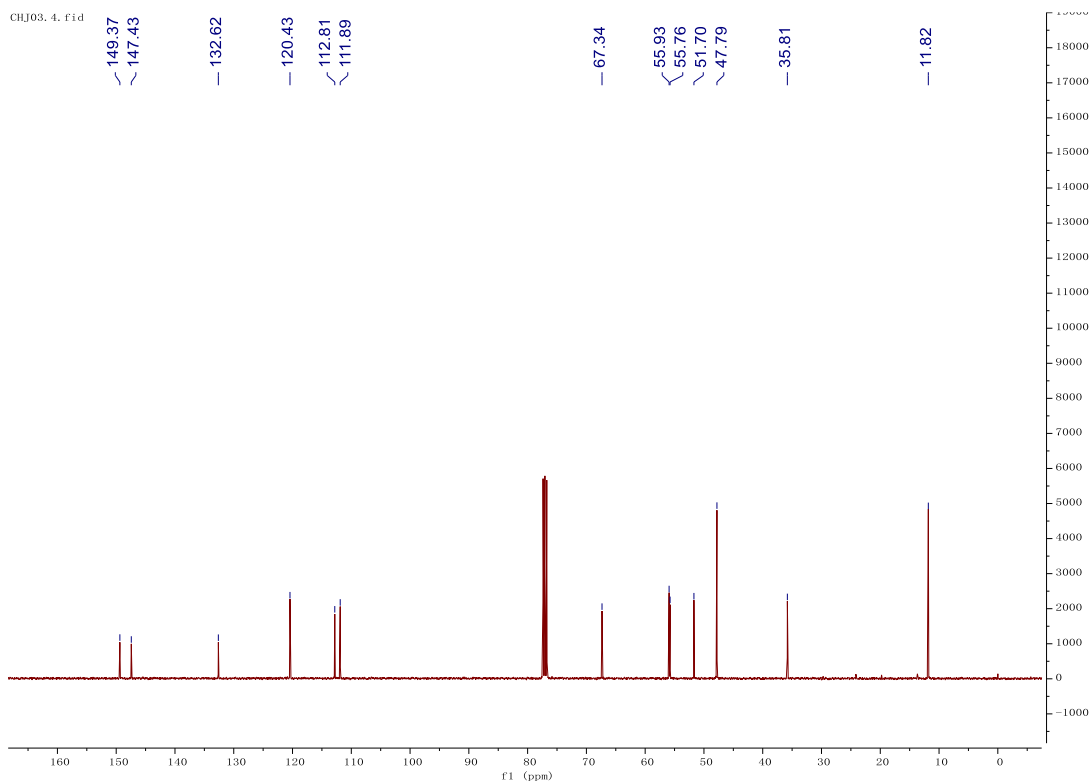

# NMR (<sup>1</sup>H and <sup>13</sup>C) and IR (KBr) of Compound CHJ02029:

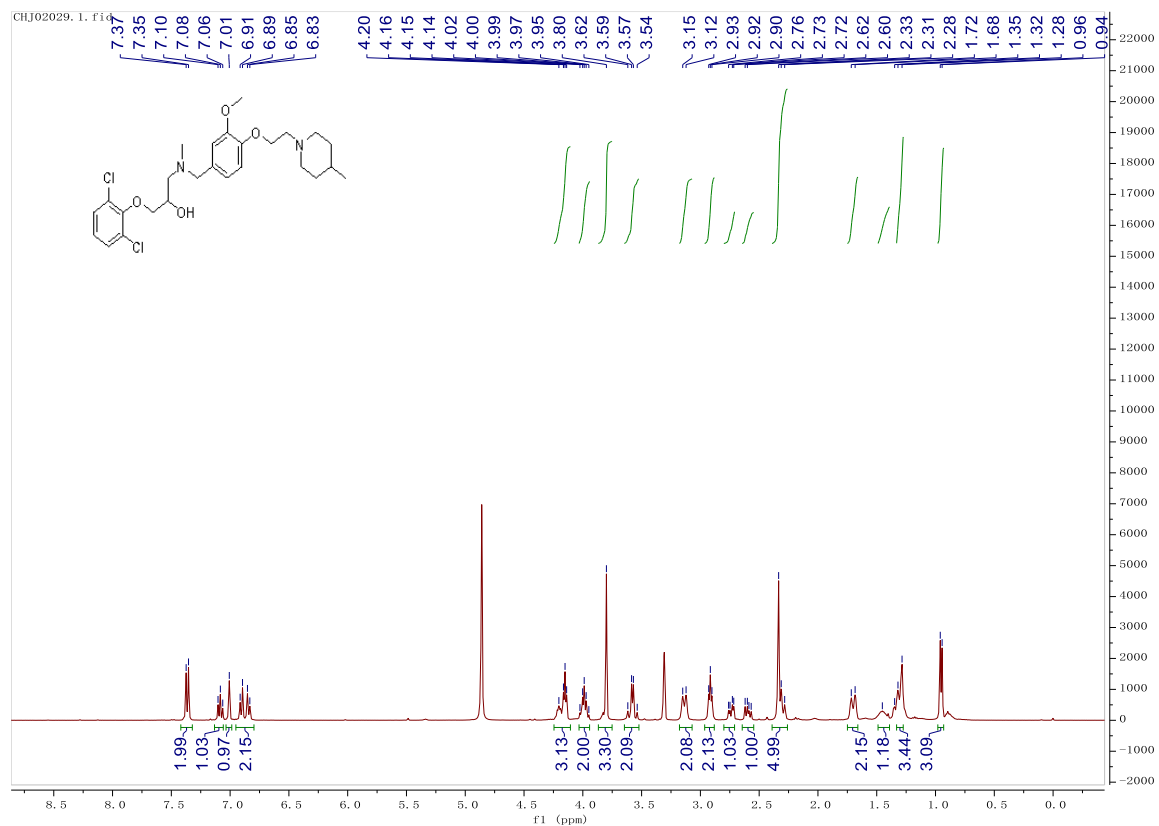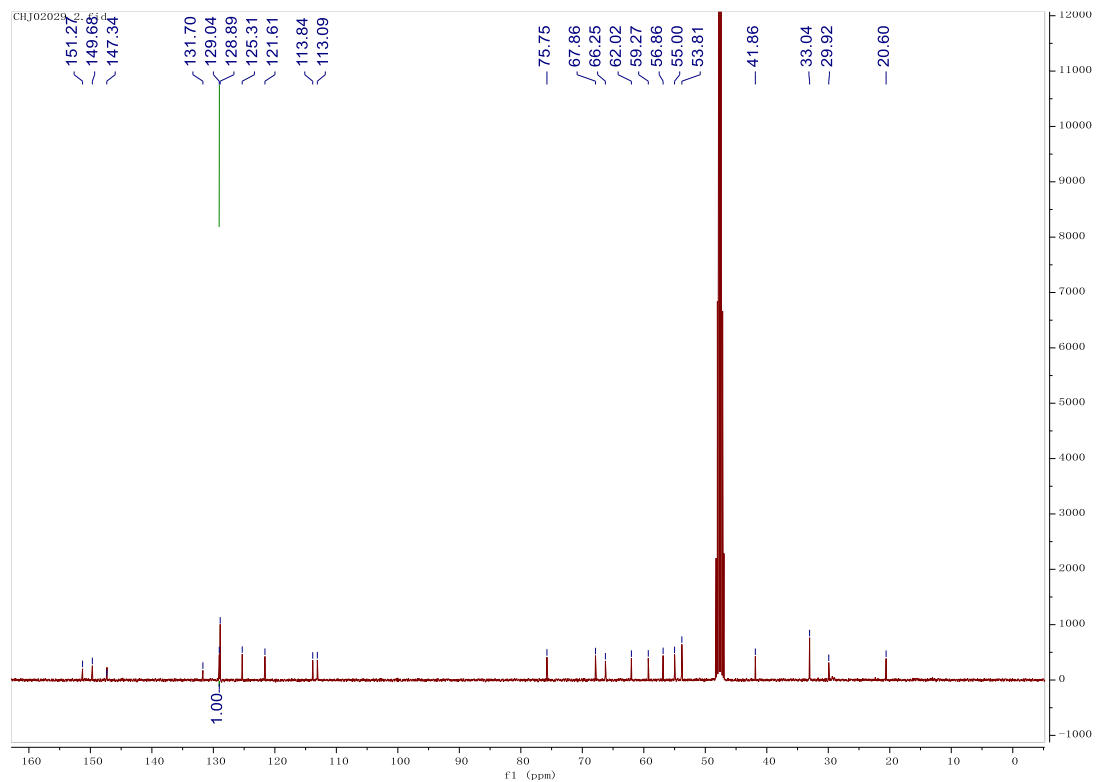

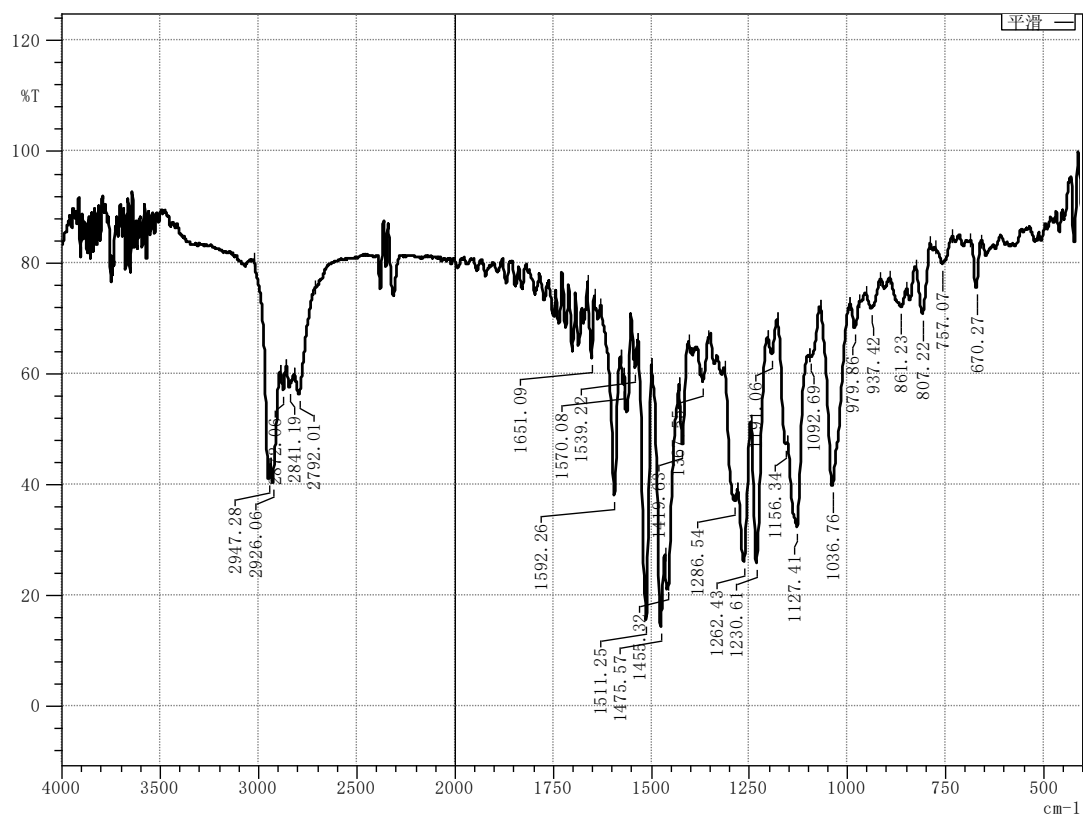

### NMR (<sup>1</sup>H and <sup>13</sup>C) and IR (KBr) of Compound CHJ02049:

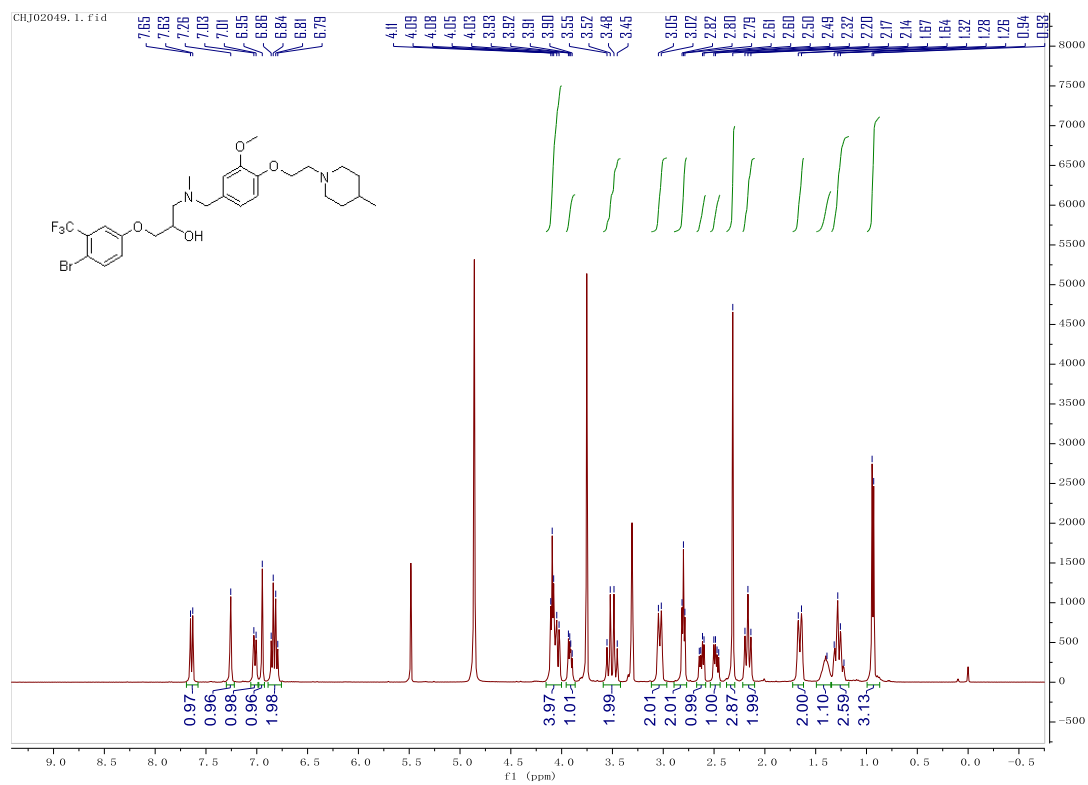

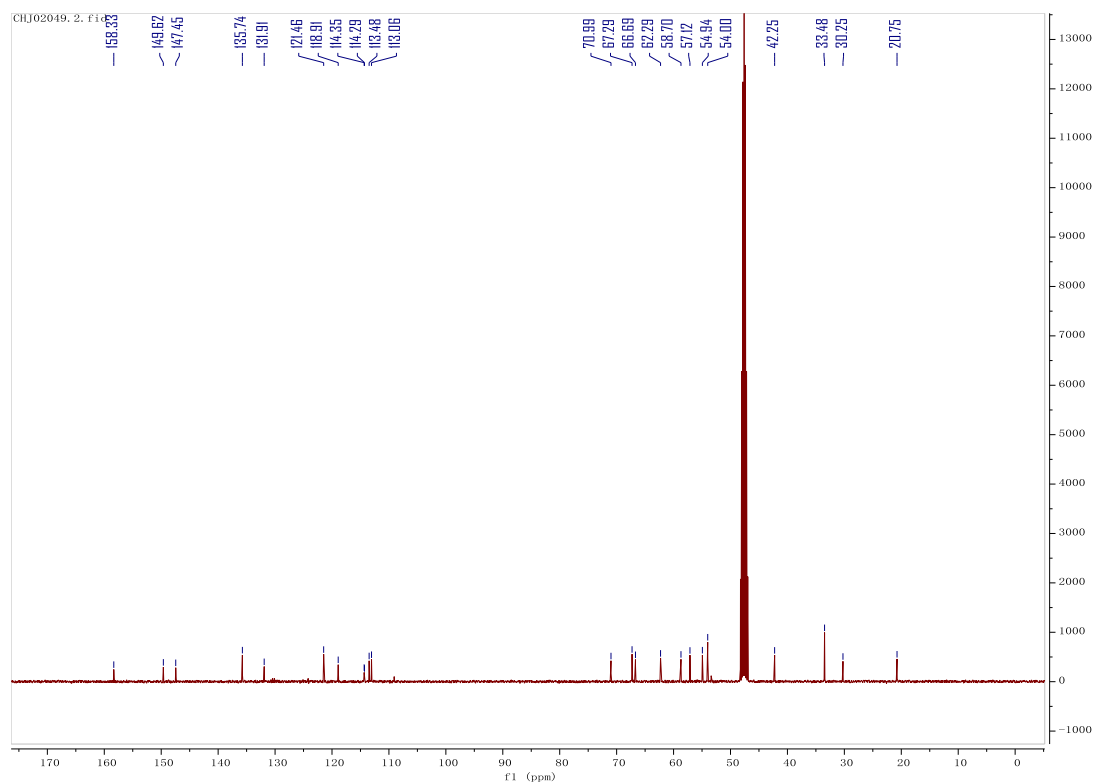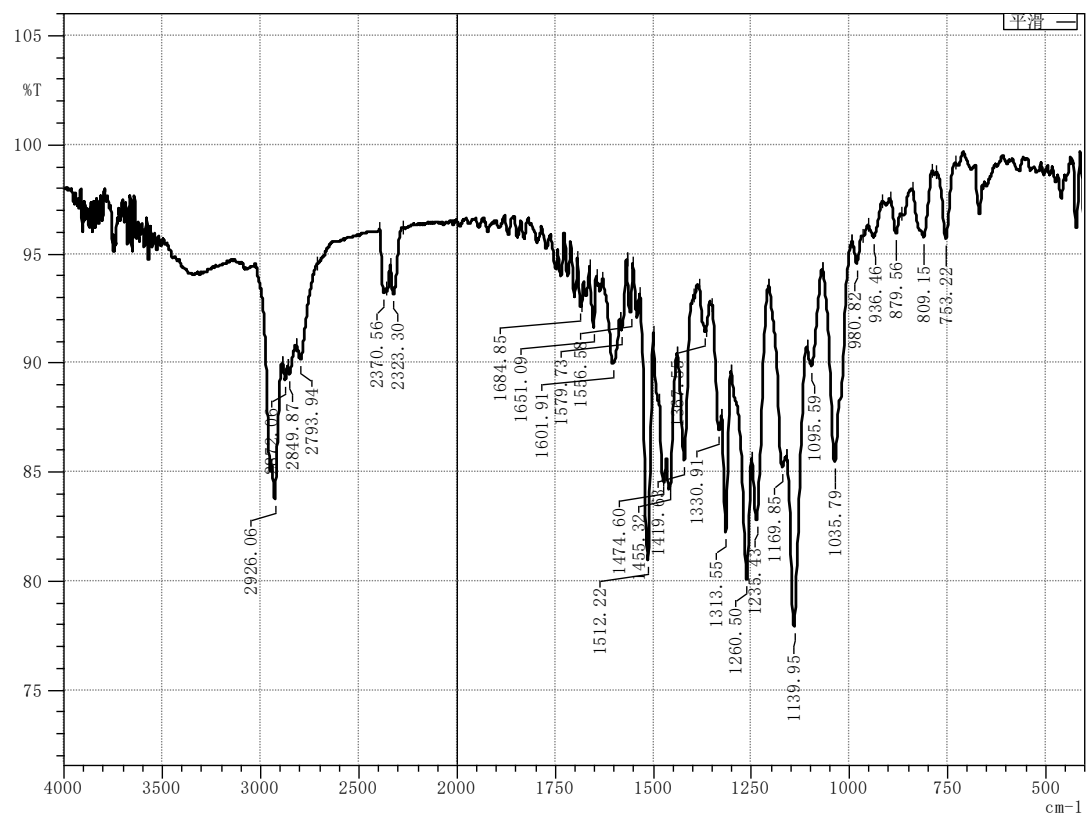

# **NMR (<sup>1</sup>H and <sup>13</sup>C) and IR (KBr) of Compound CHJ02050:**

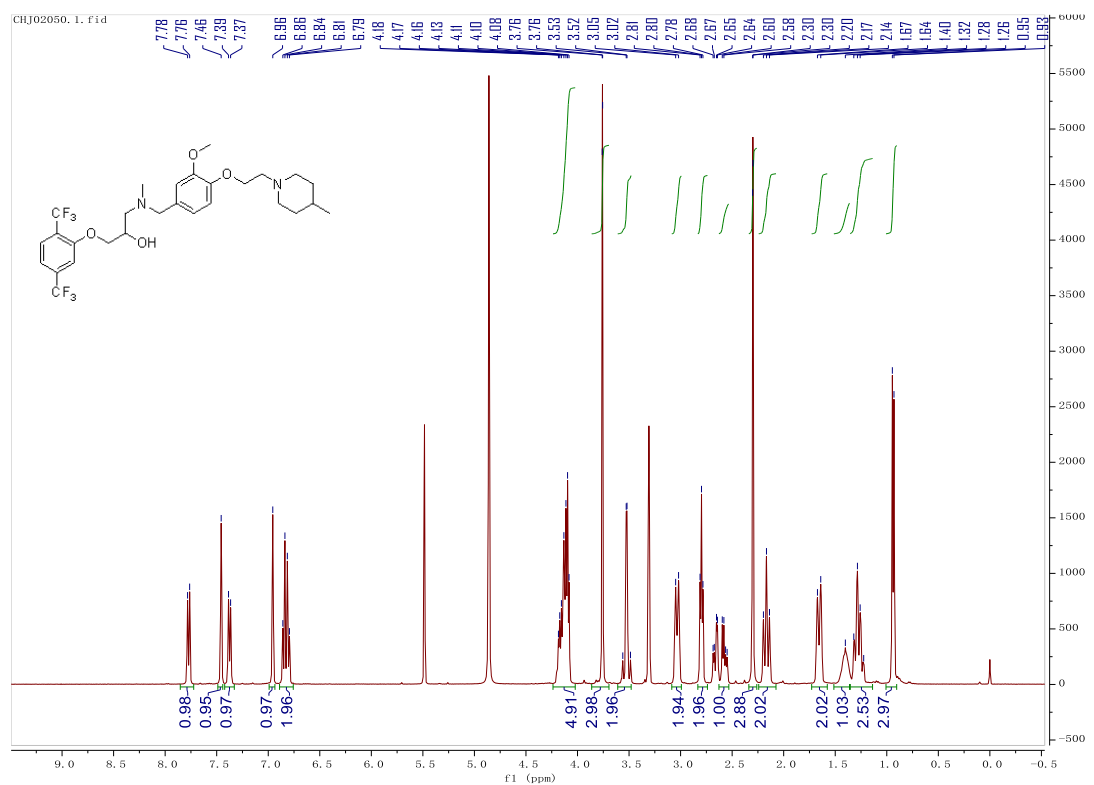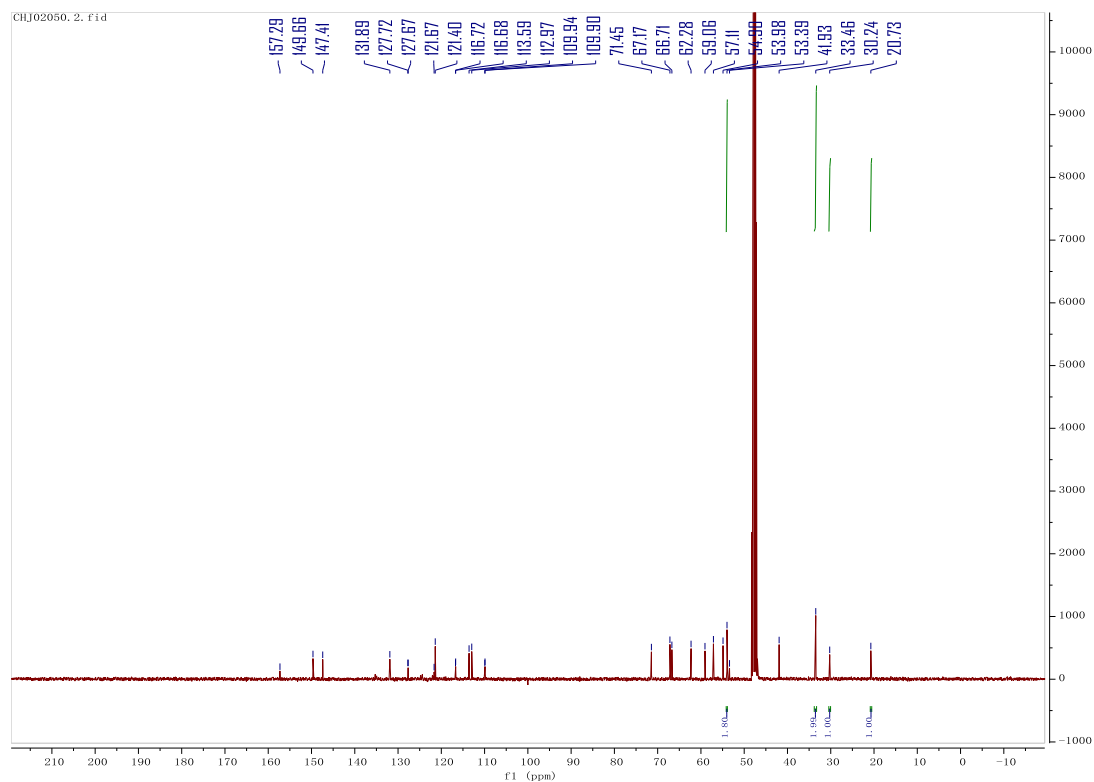

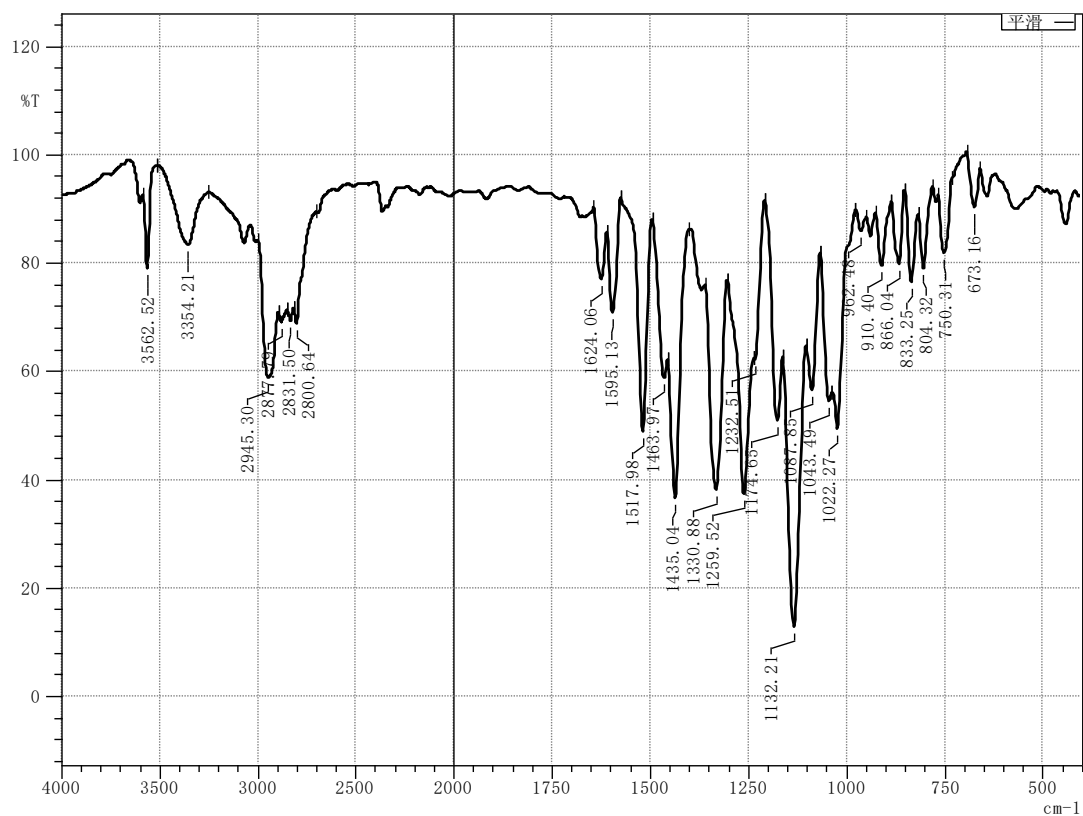

**NMR (<sup>1</sup>H and <sup>13</sup>C) and IR (KBr) of Compound CHJ03001:**

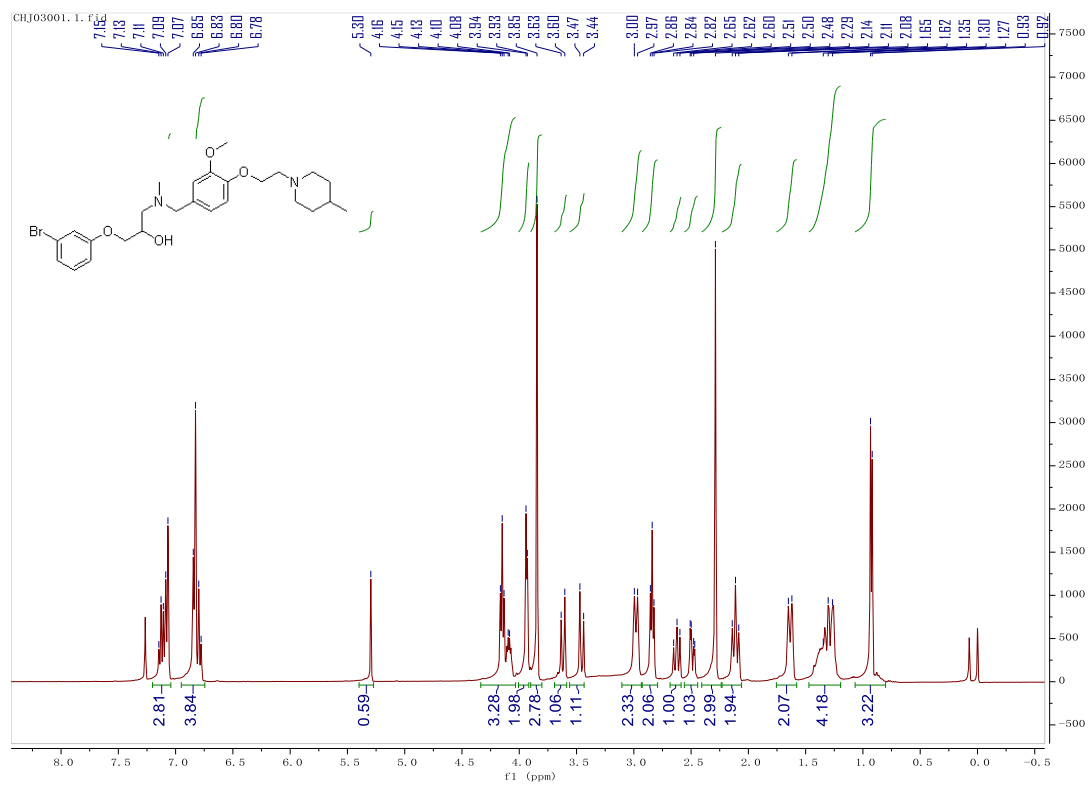

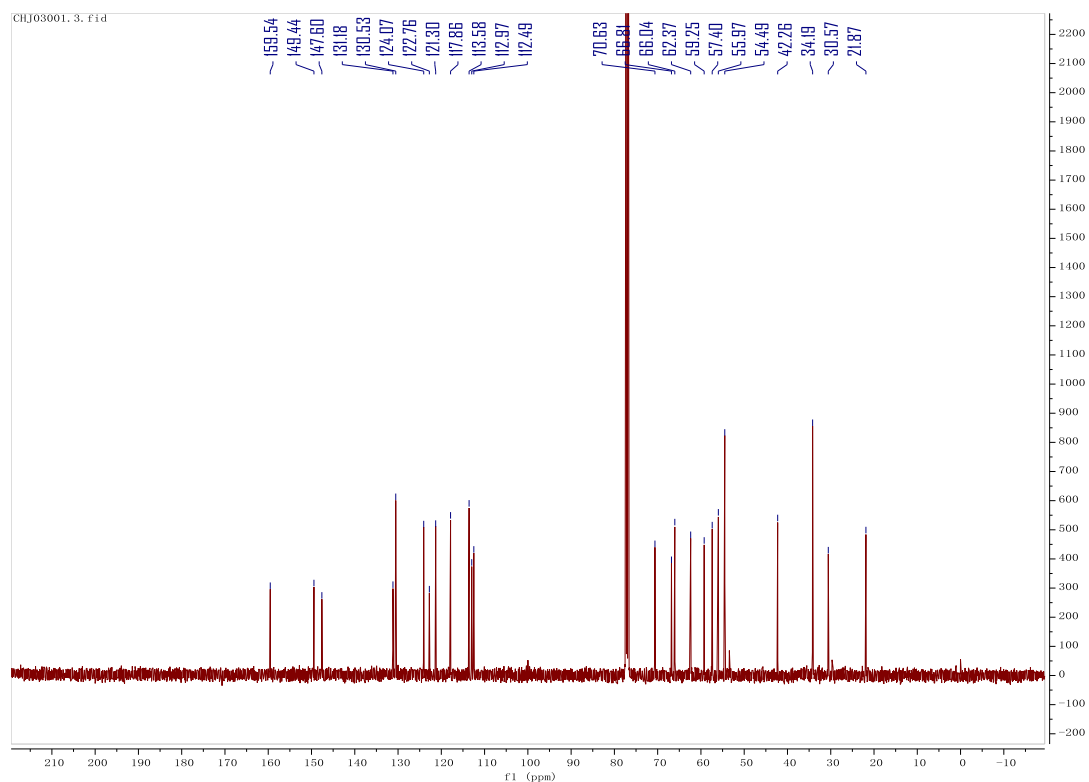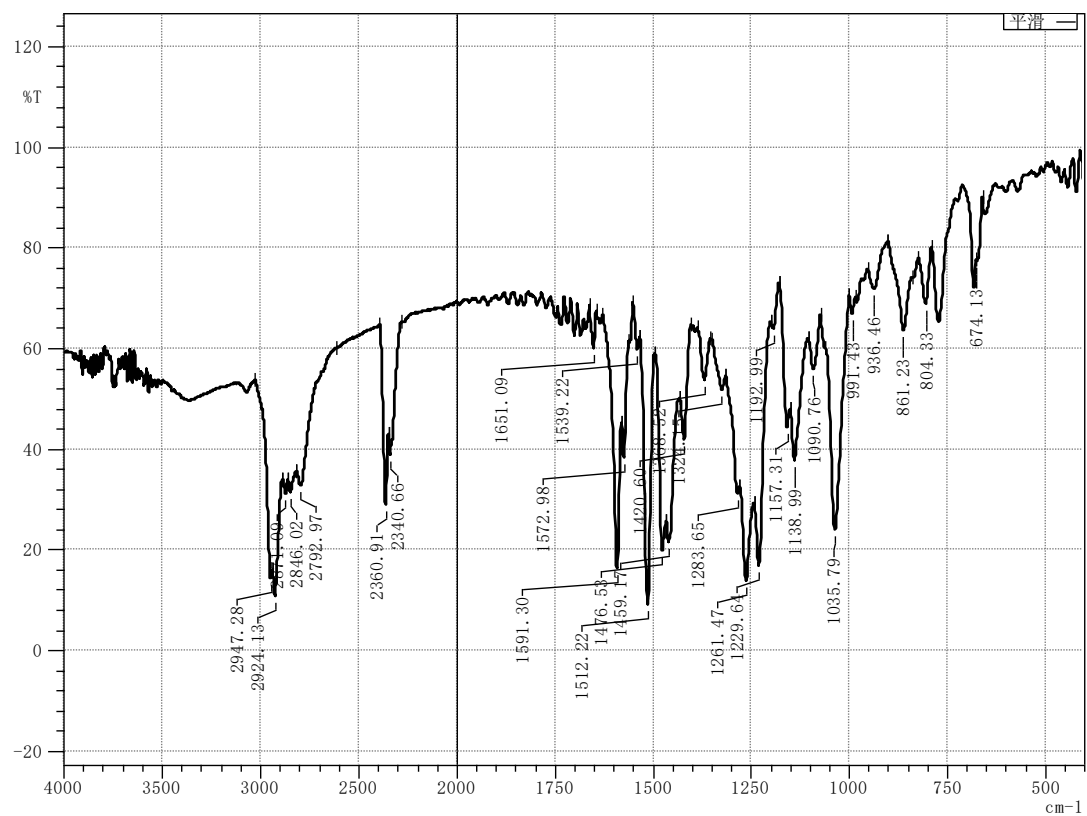



# **NMR (<sup>1</sup>H and <sup>13</sup>C) and IR (KBr) of Compound CHJ03003:**

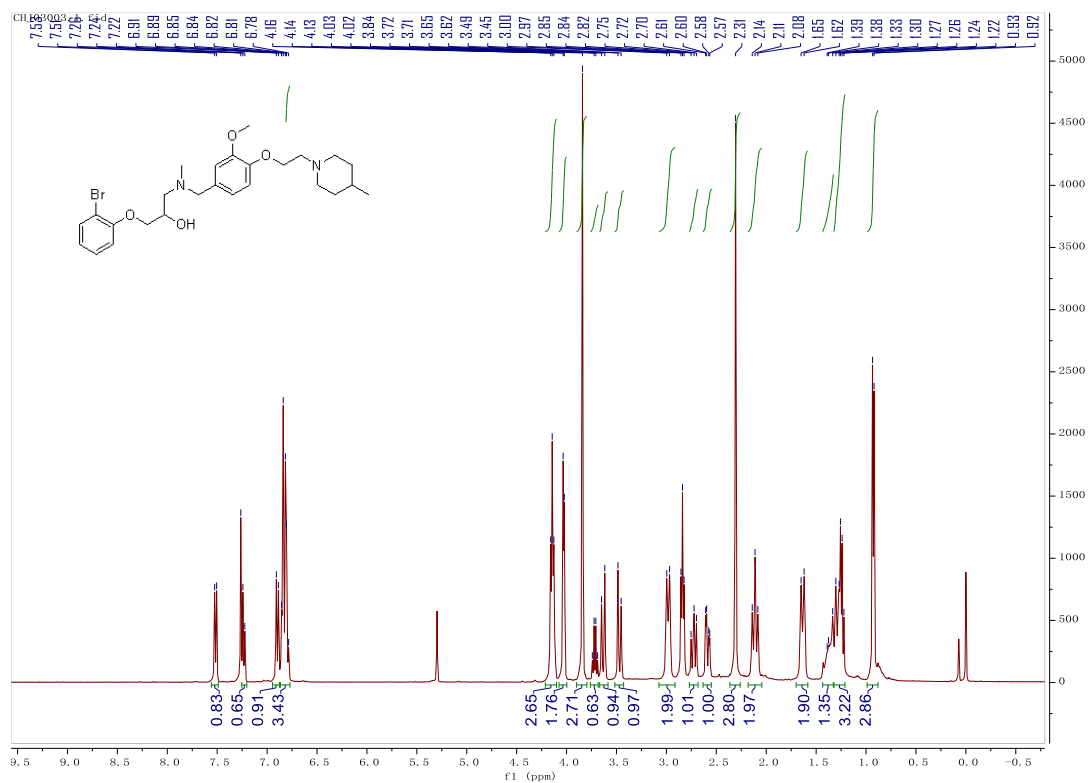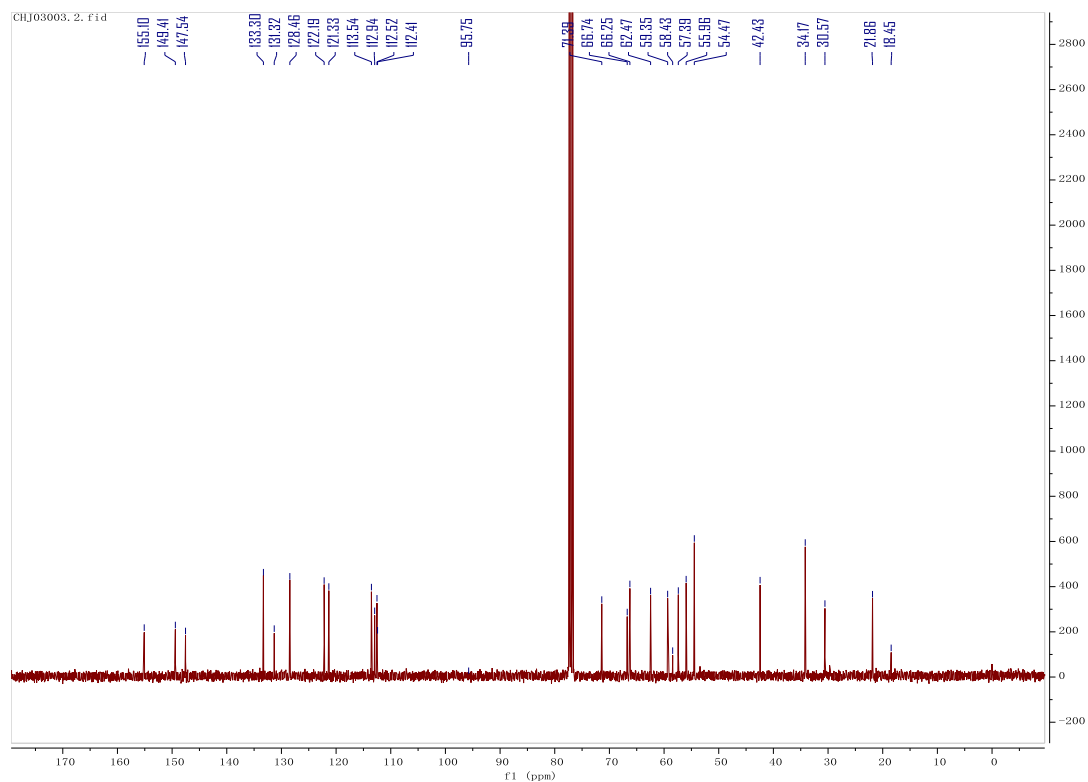

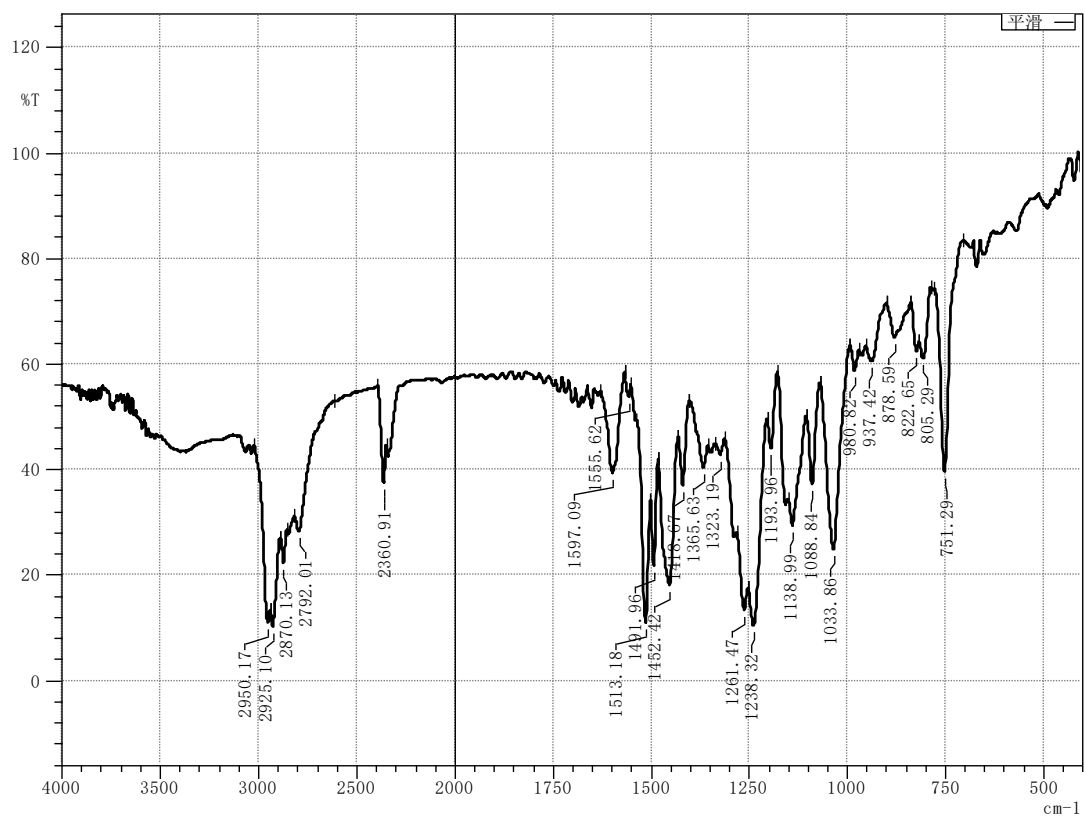

**NMR (<sup>1</sup>H and <sup>13</sup>C) and IR (KBr) of Compound CHJ03004:**

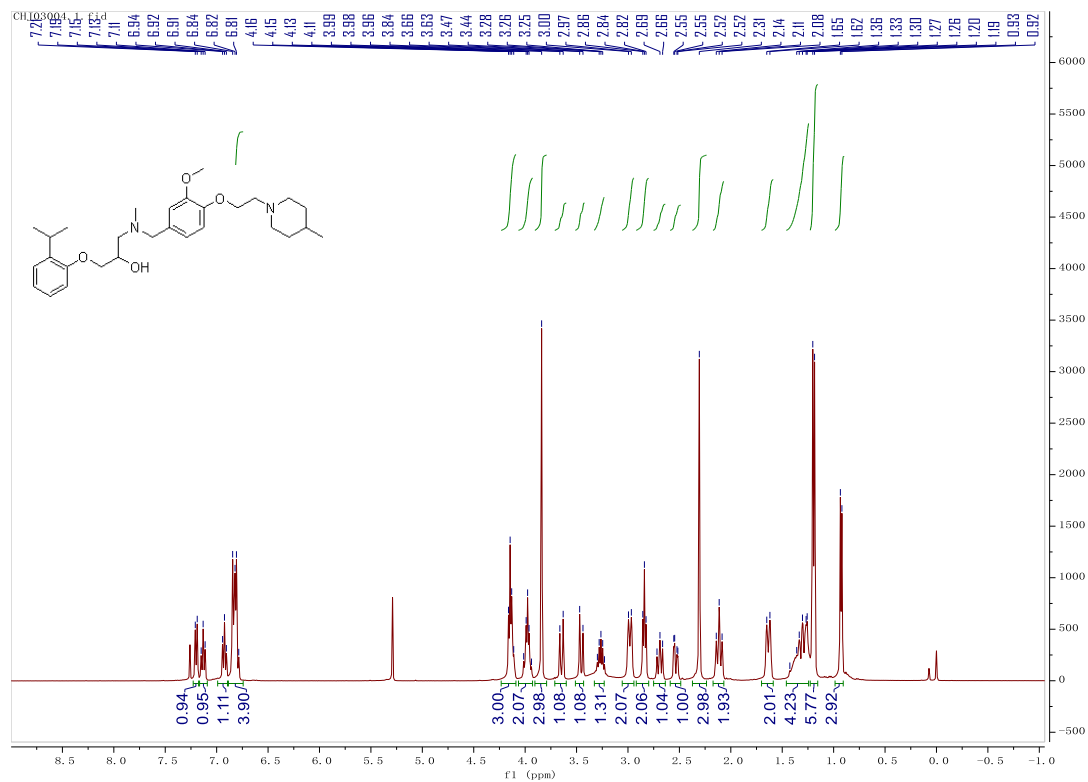

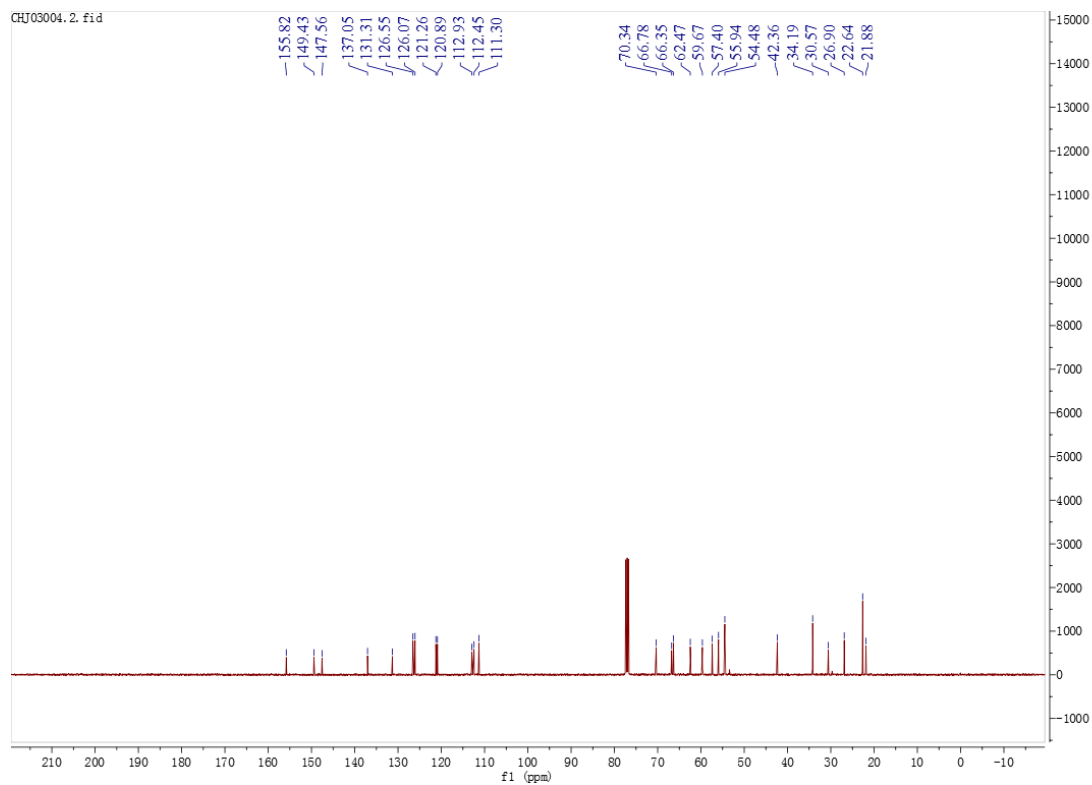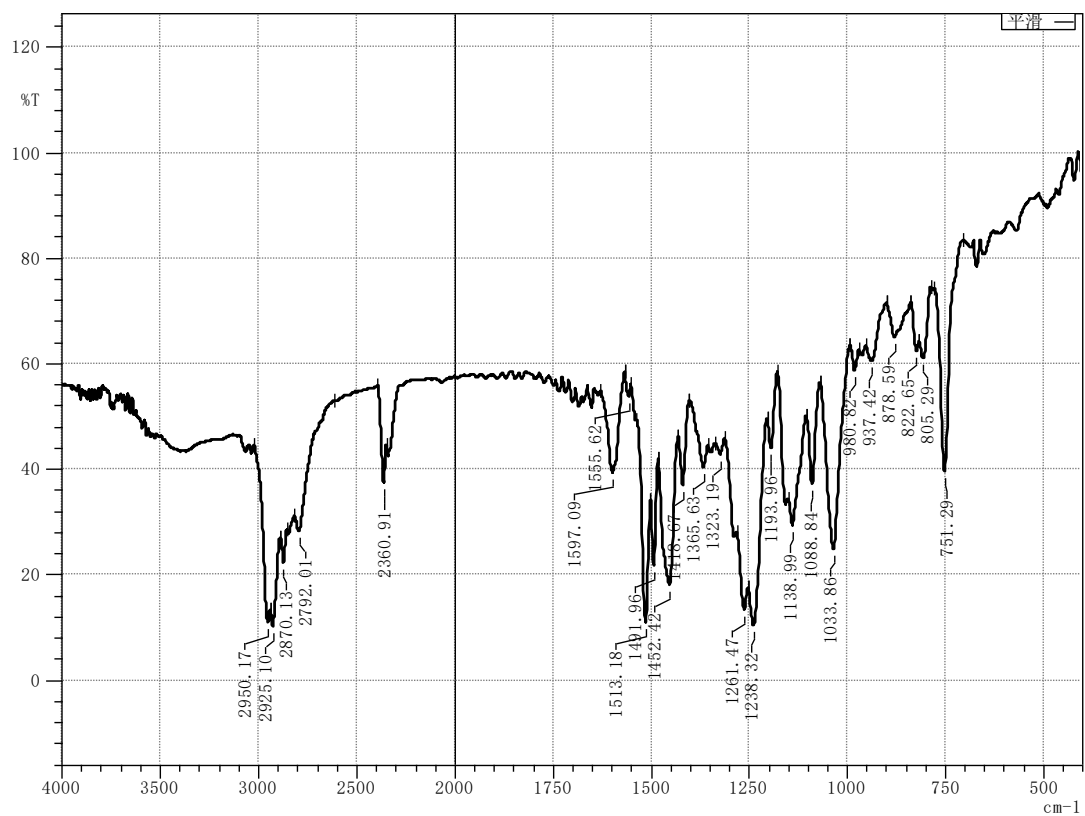

**NMR (<sup>1</sup>H and <sup>13</sup>C) and IR (KBr) of Compound CHJ03005:**

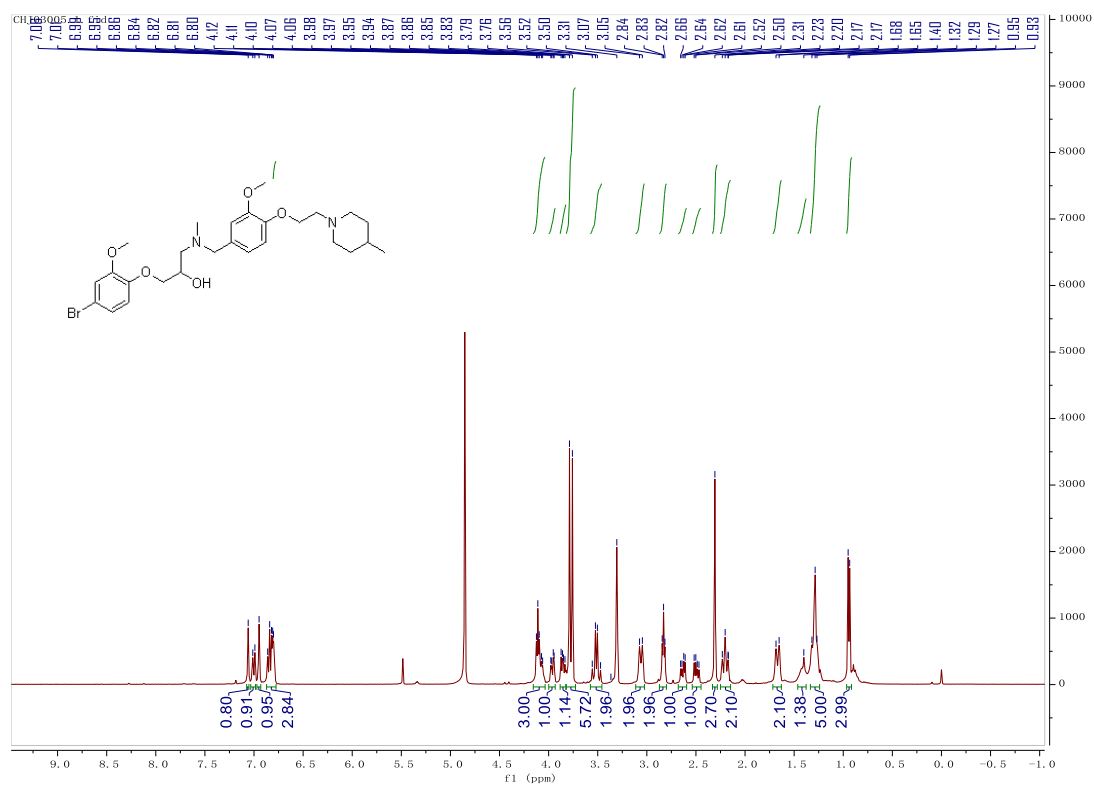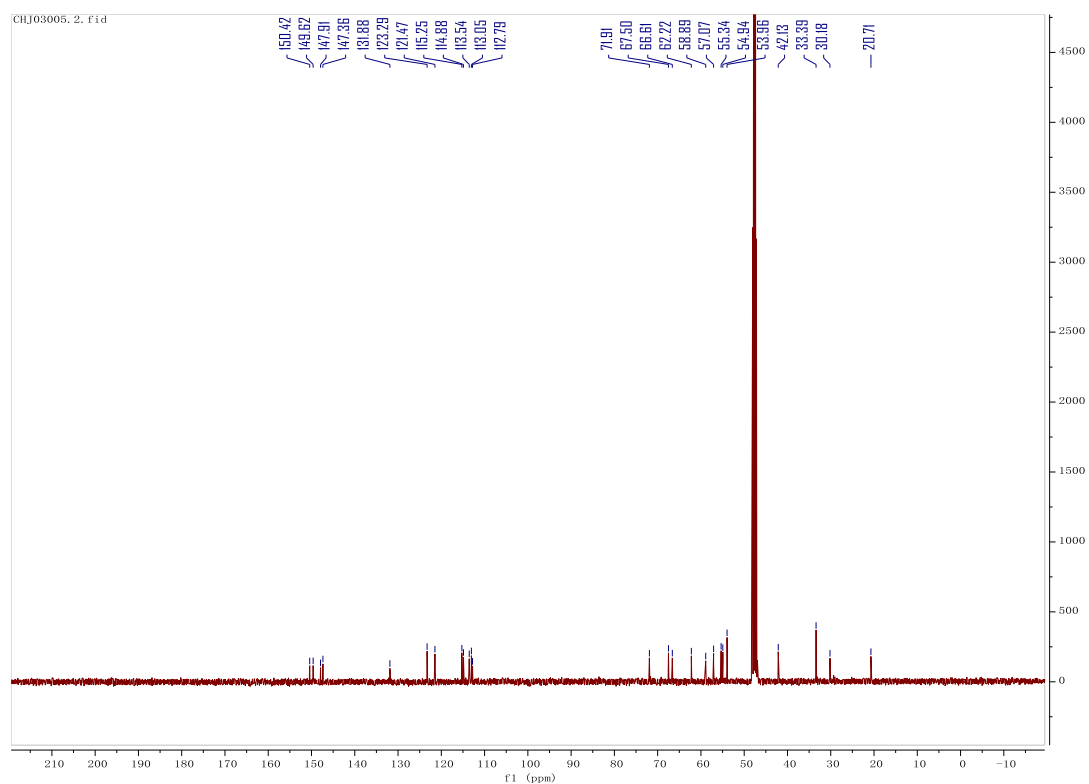

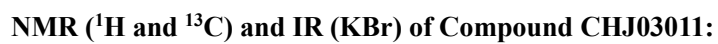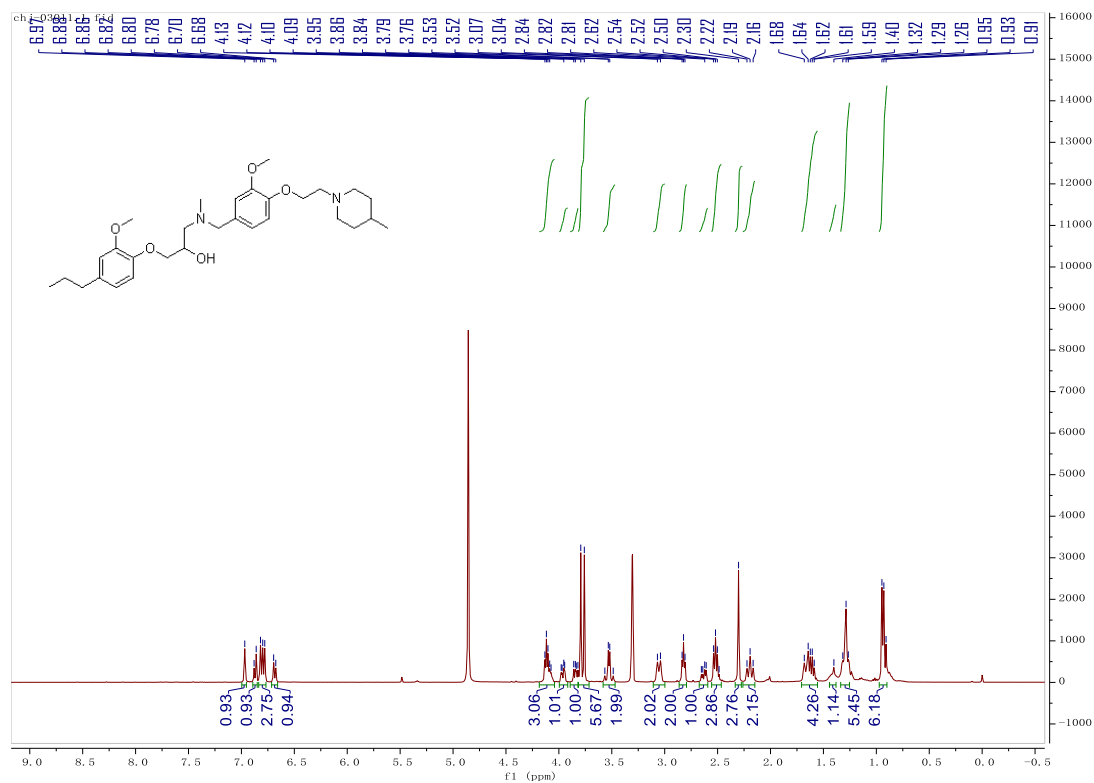

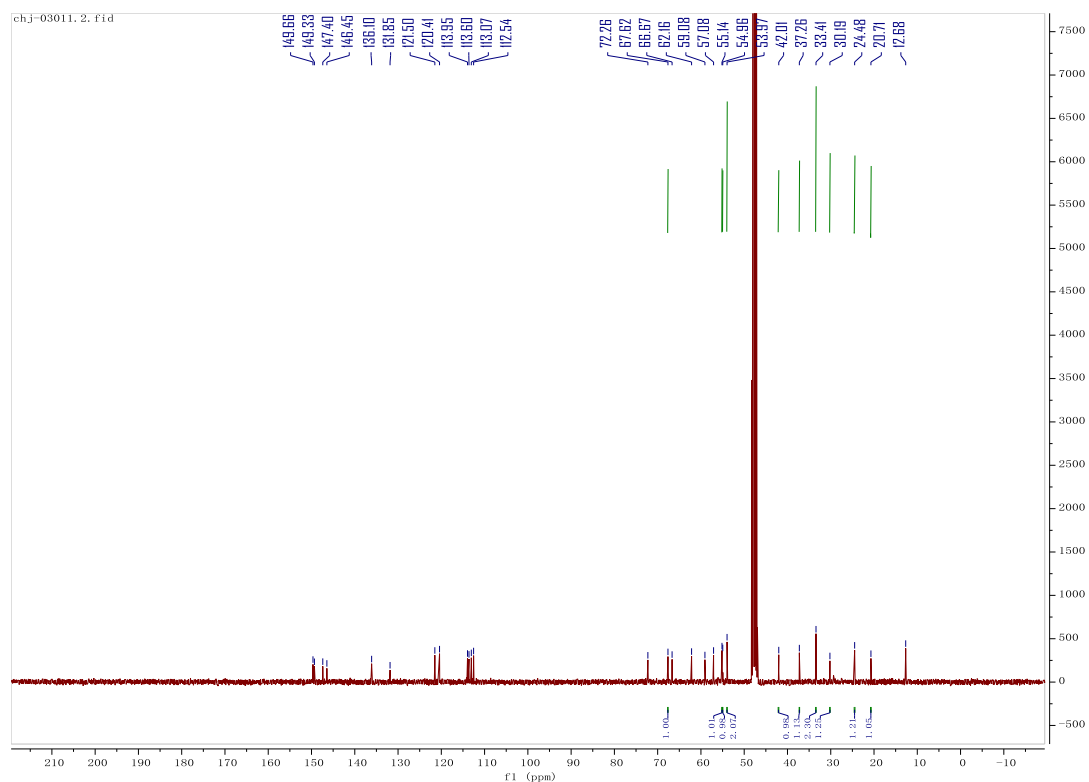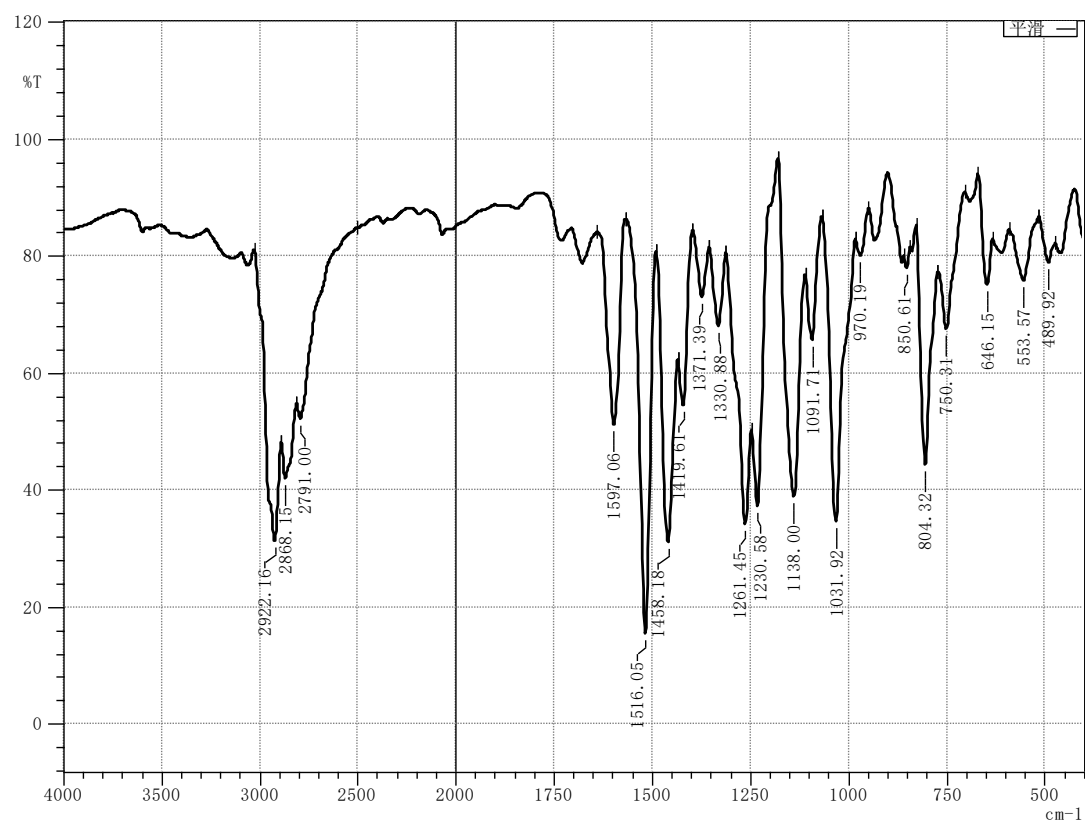

# **NMR (<sup>1</sup>H and <sup>13</sup>C) and IR (KBr) of Compound CHJ03012:**

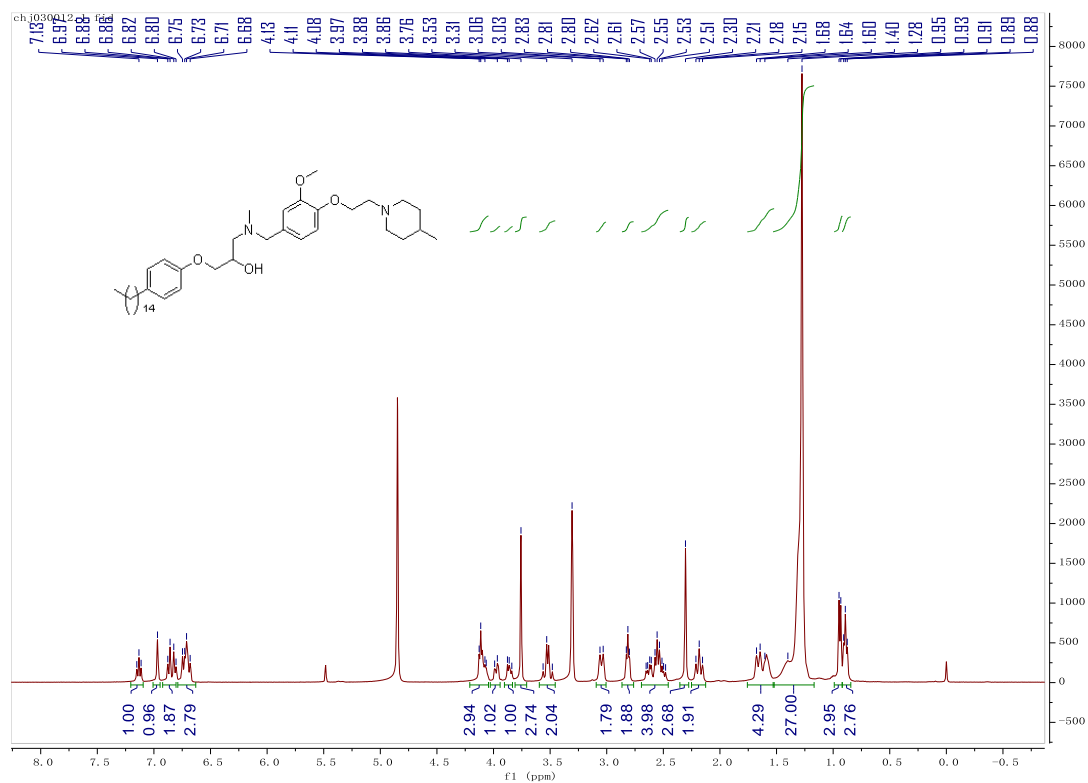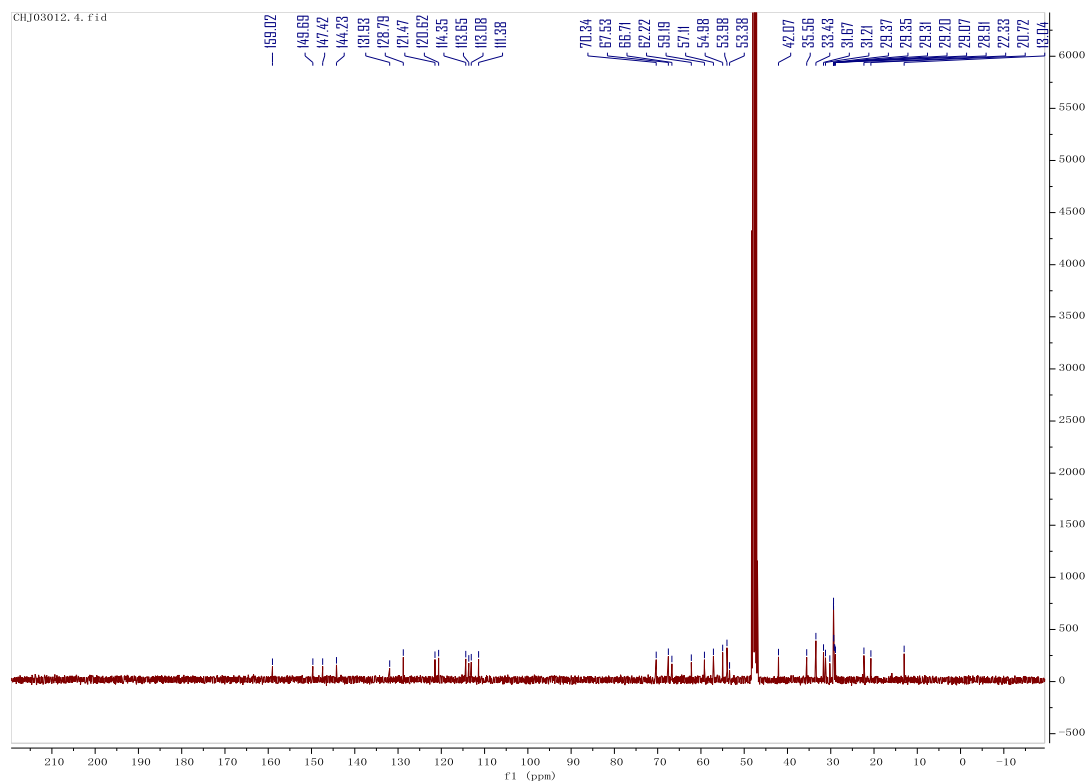

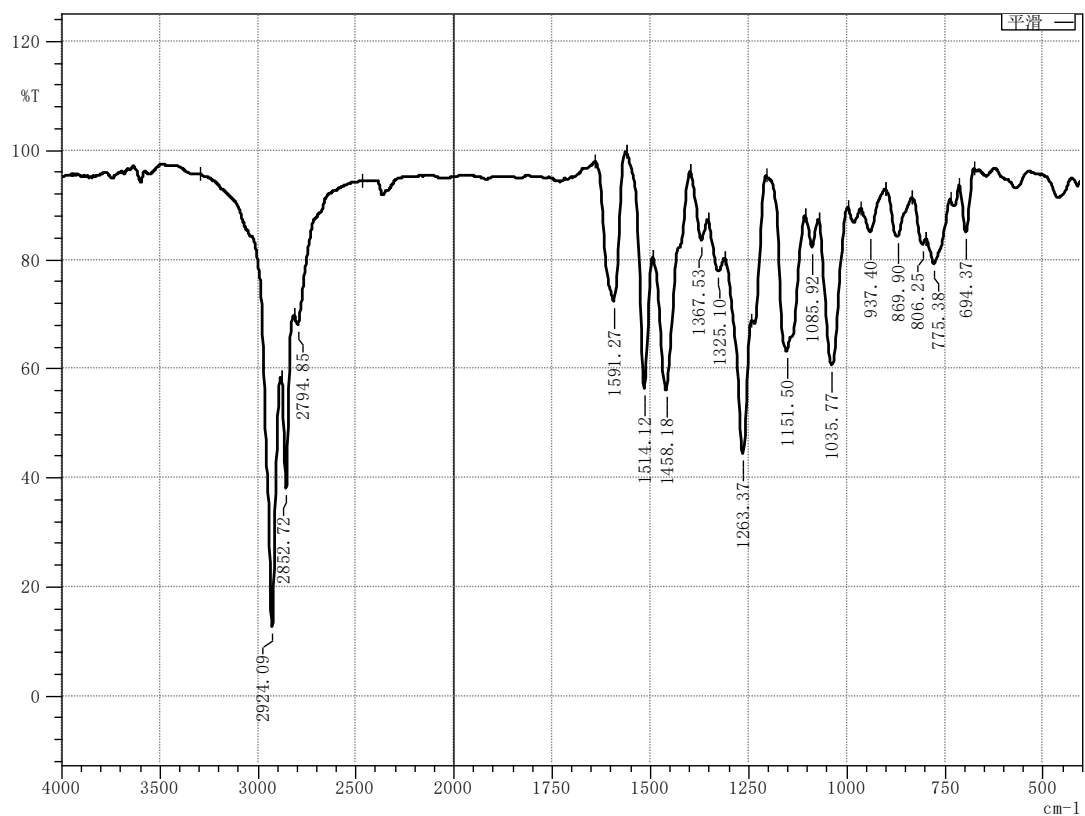

**NMR (<sup>1</sup>H and <sup>13</sup>C) and IR (KBr) of Compound CHJ03014:**

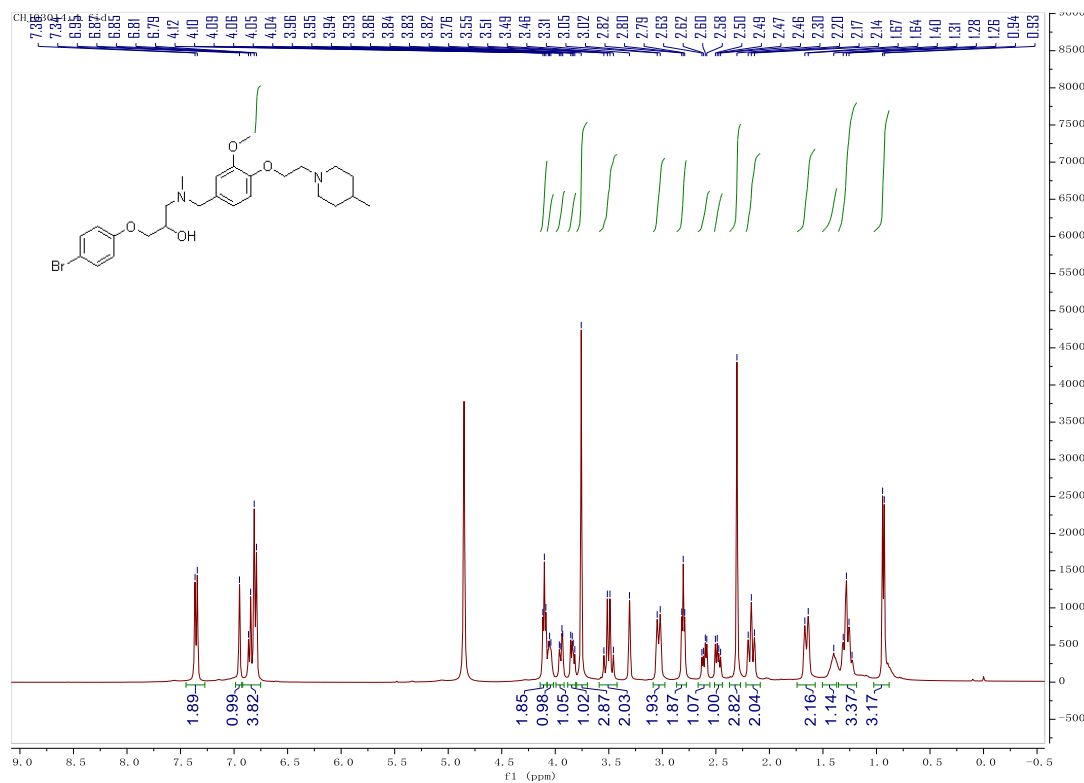



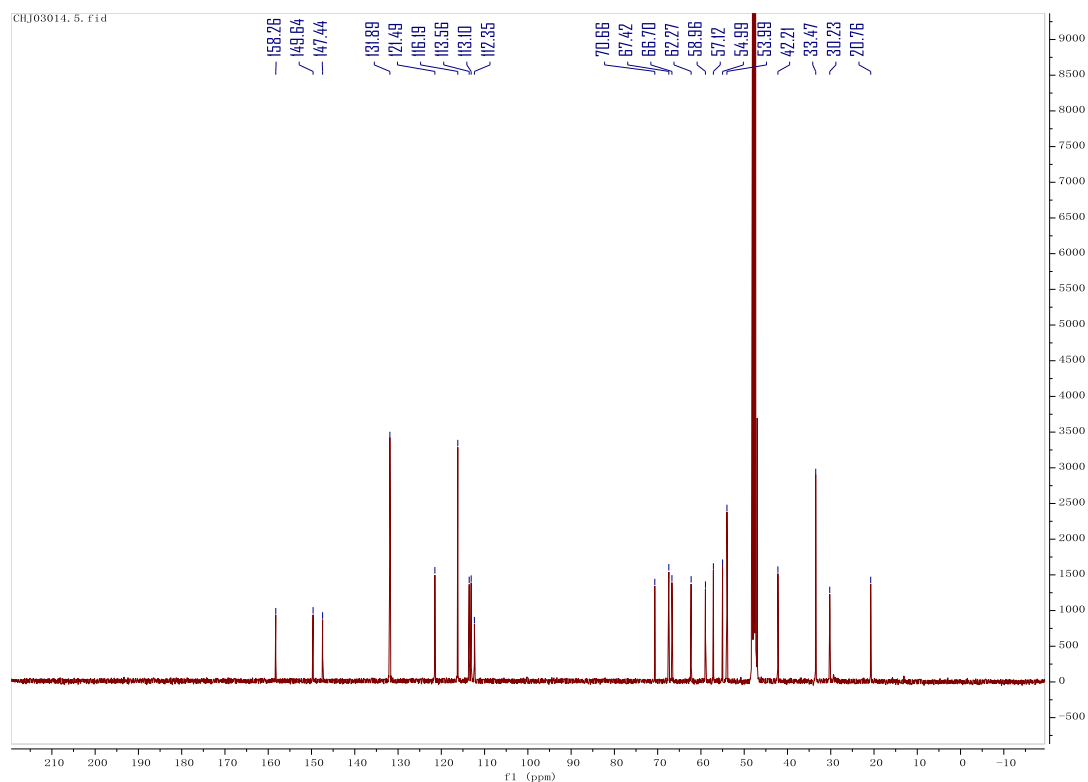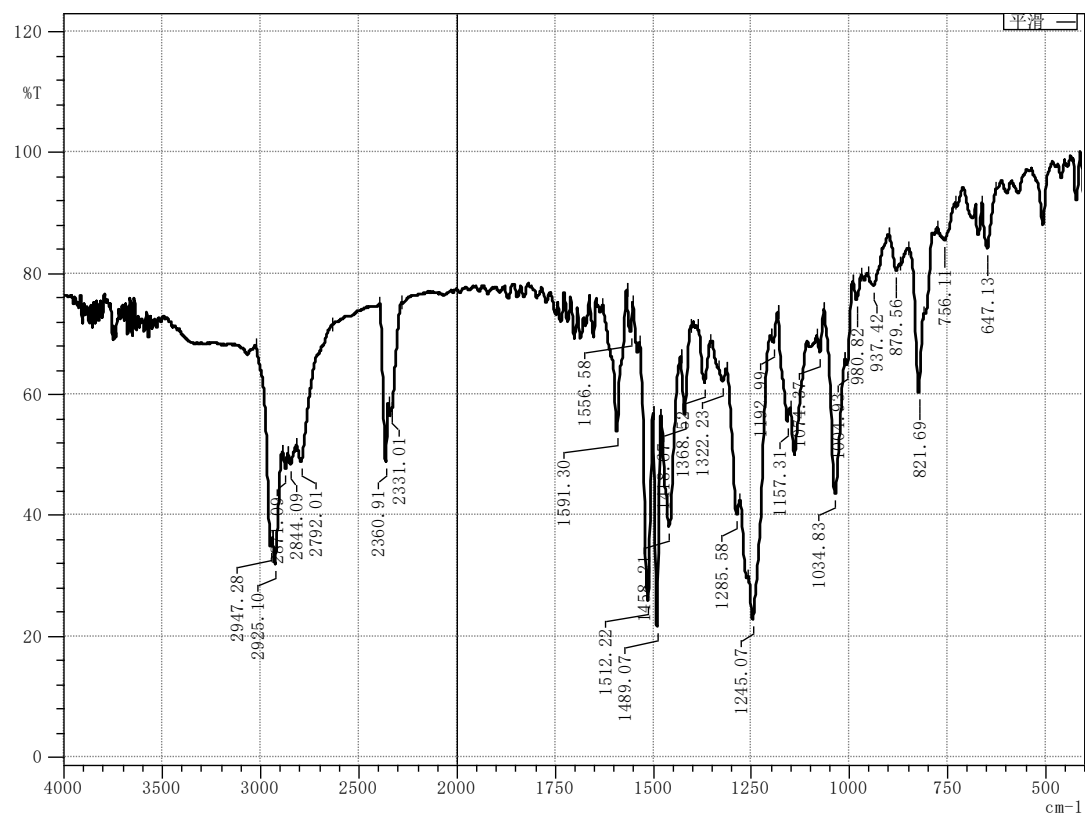

# **NMR (<sup>1</sup>H and <sup>13</sup>C) and IR (KBr) of Compound CHJ03015:**

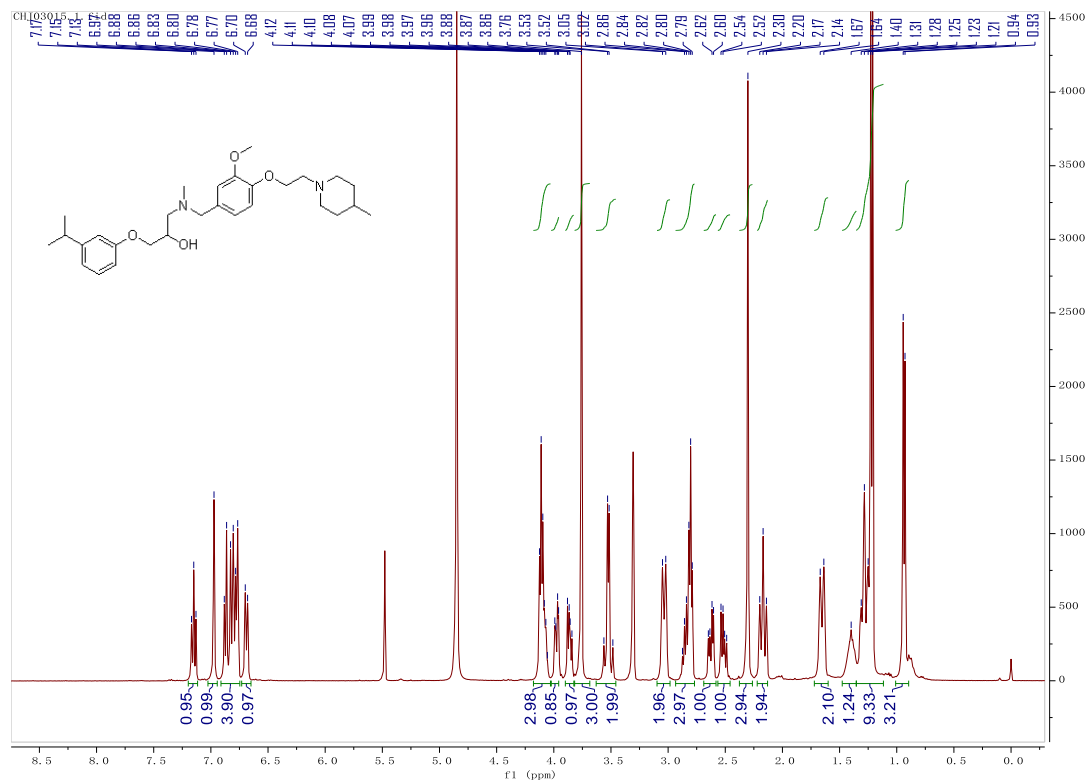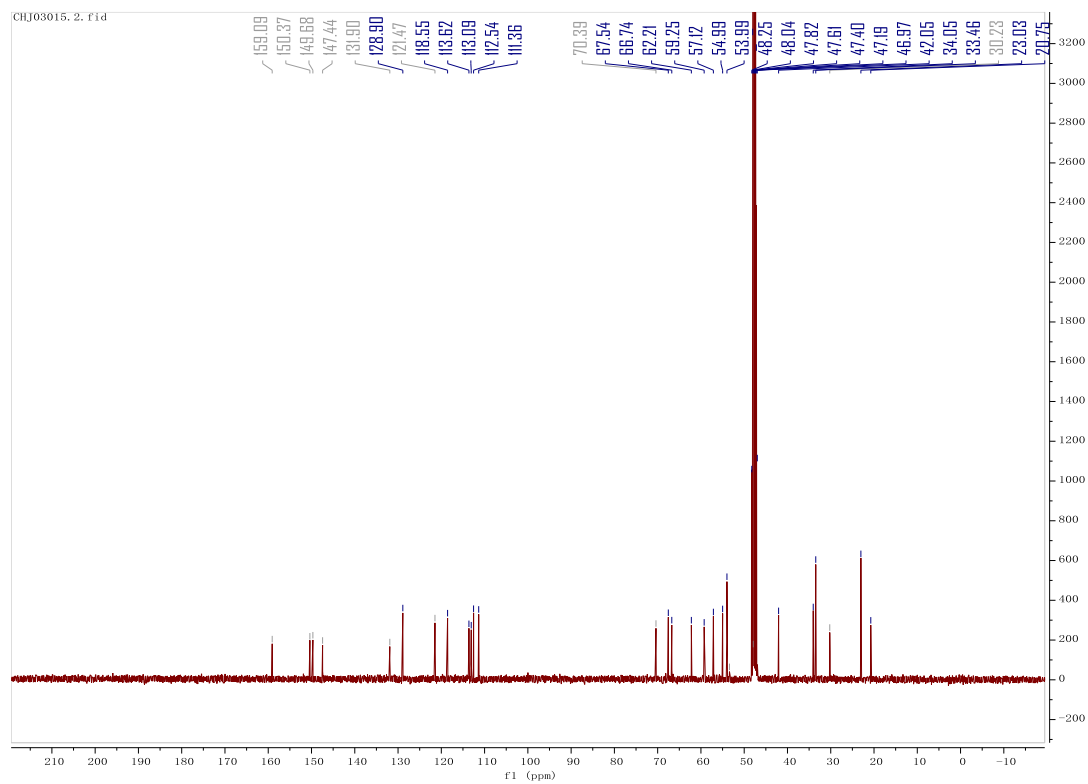

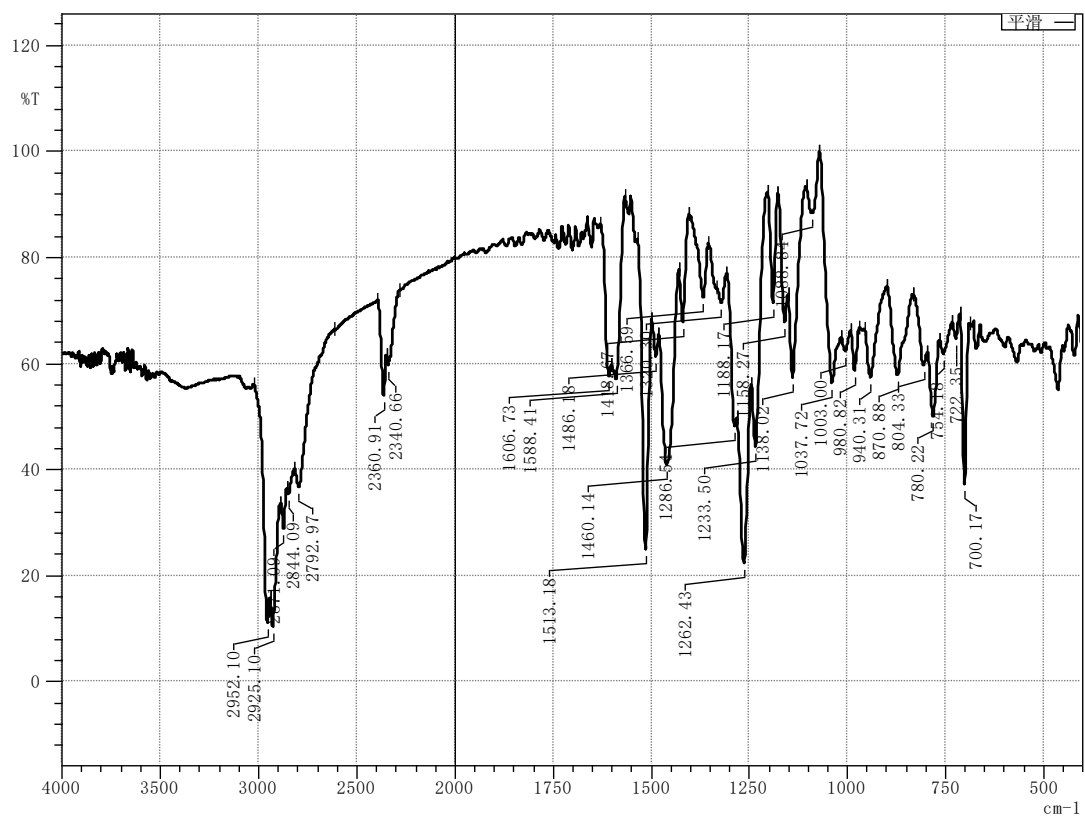

**NMR (<sup>1</sup>H and <sup>13</sup>C) and IR (KBr) of Compound CHJ03017:**

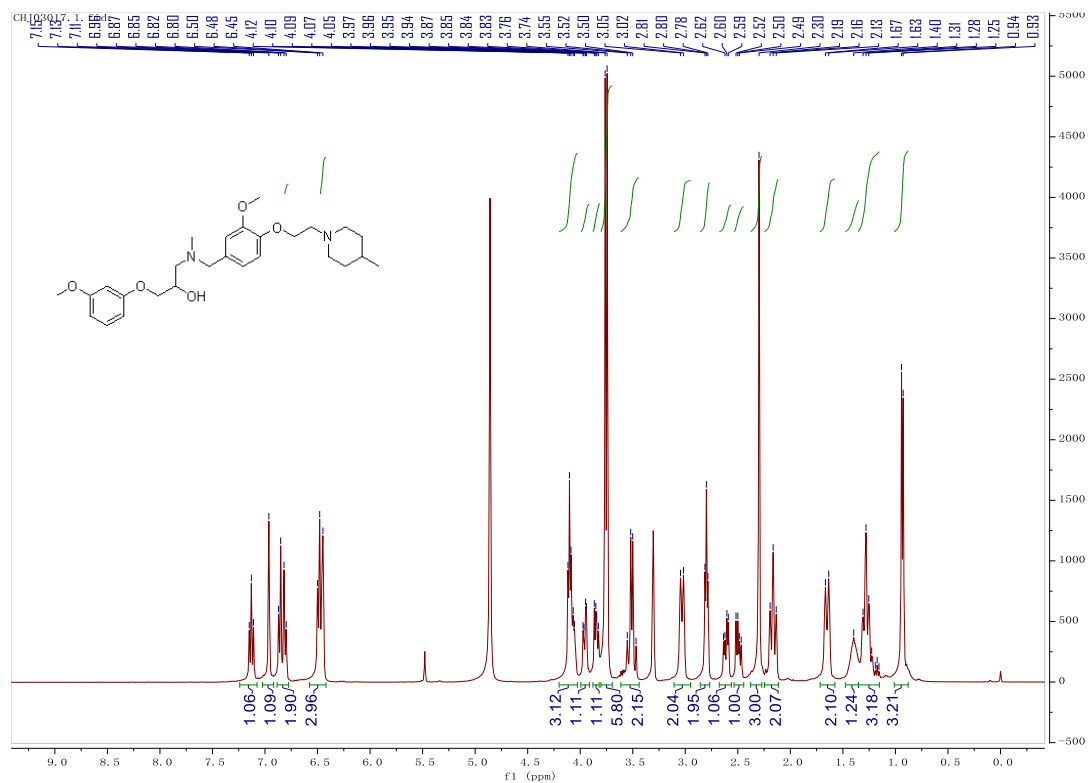

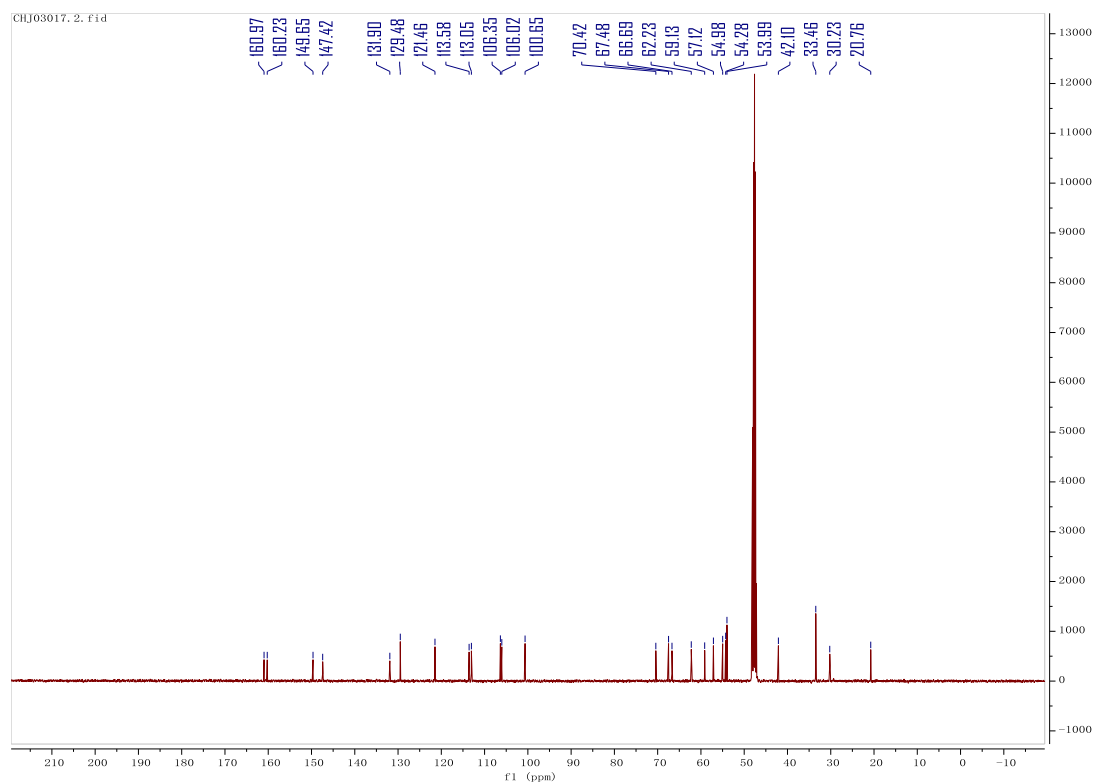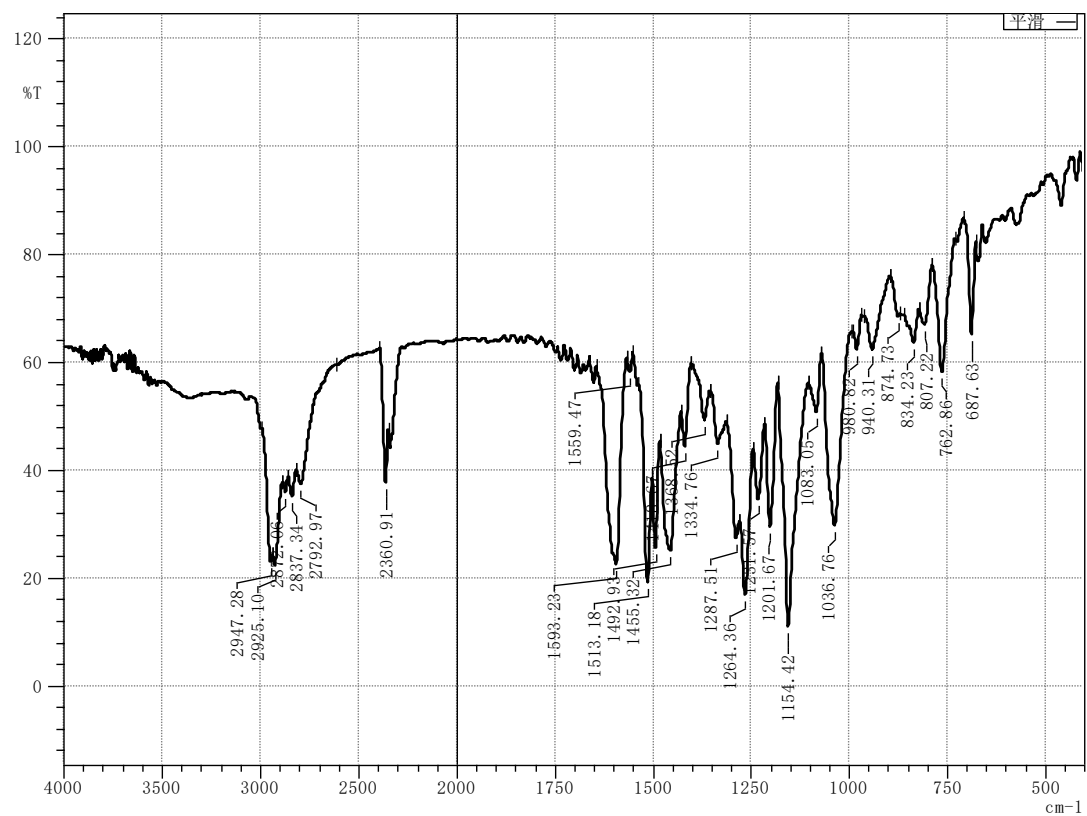

# **NMR (<sup>1</sup>H and <sup>13</sup>C) and IR (KBr) of Compound CHJ03018:**

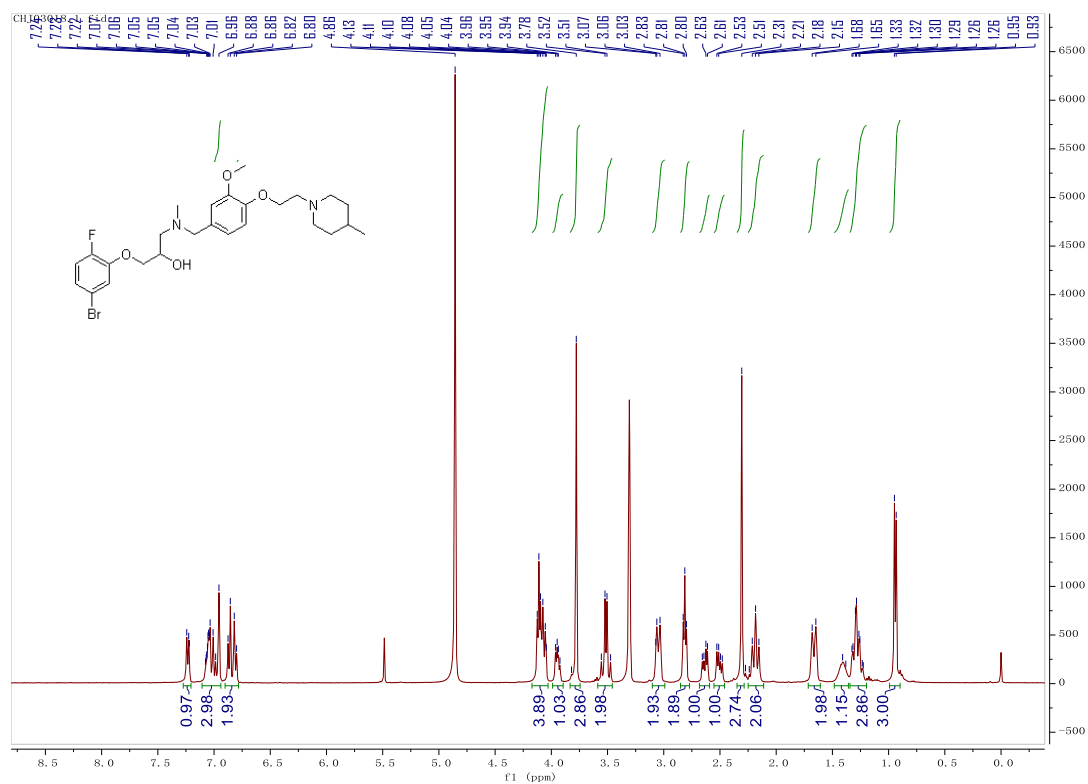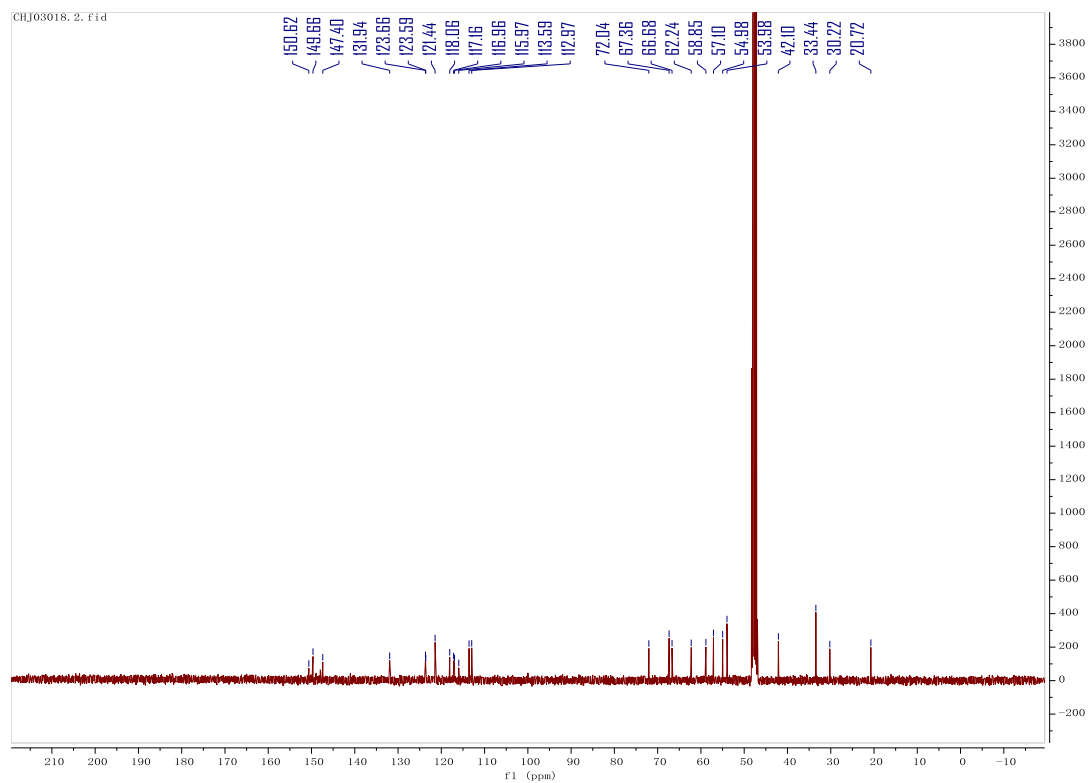

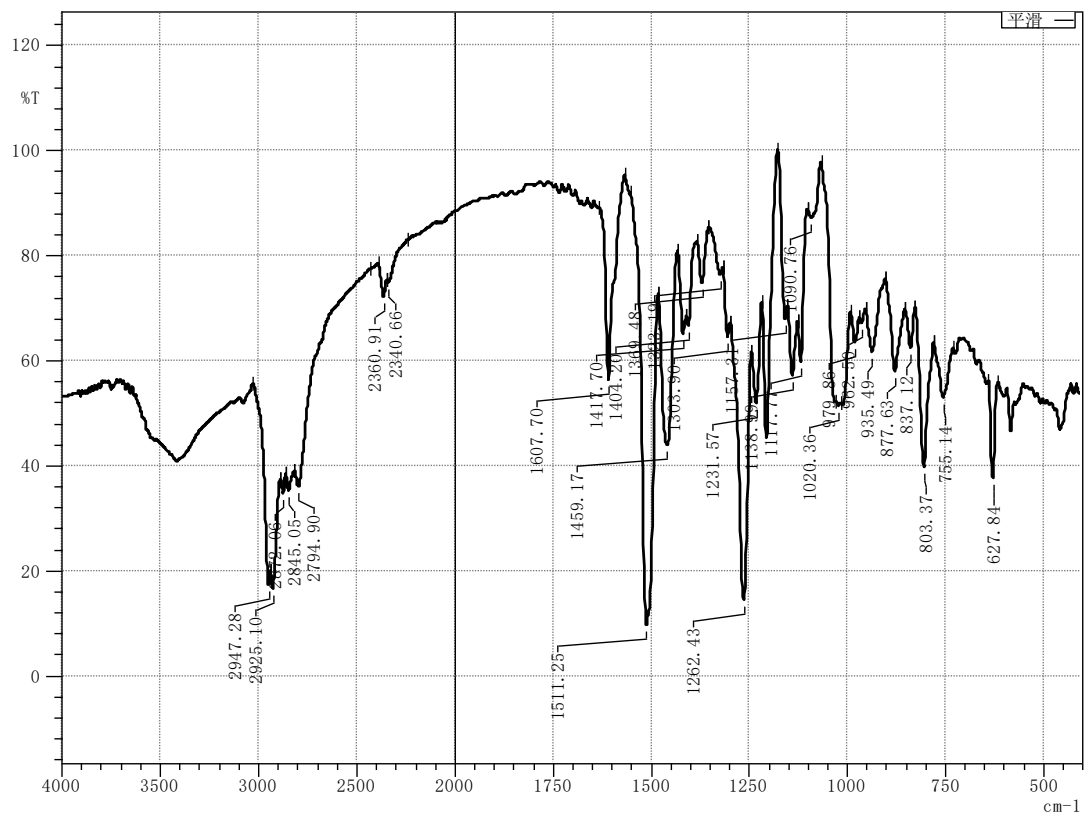

**NMR (<sup>1</sup>H and <sup>13</sup>C) and IR (KBr) of Compound CHJ03043:**

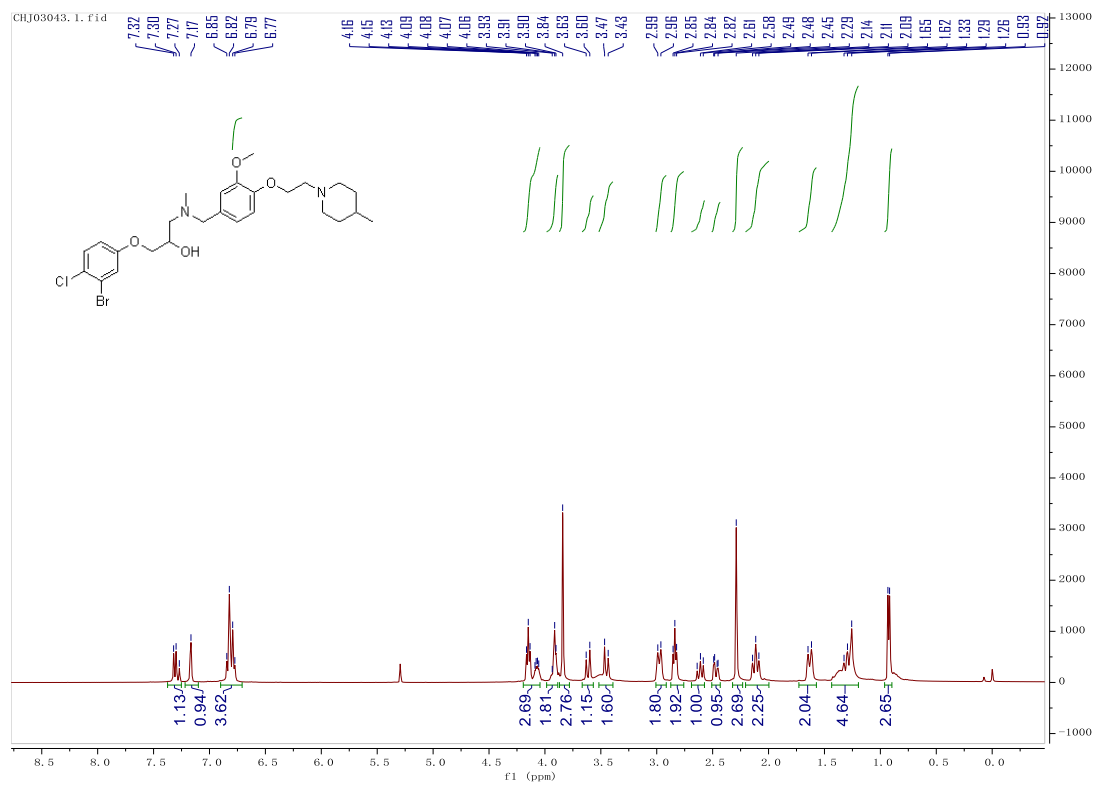

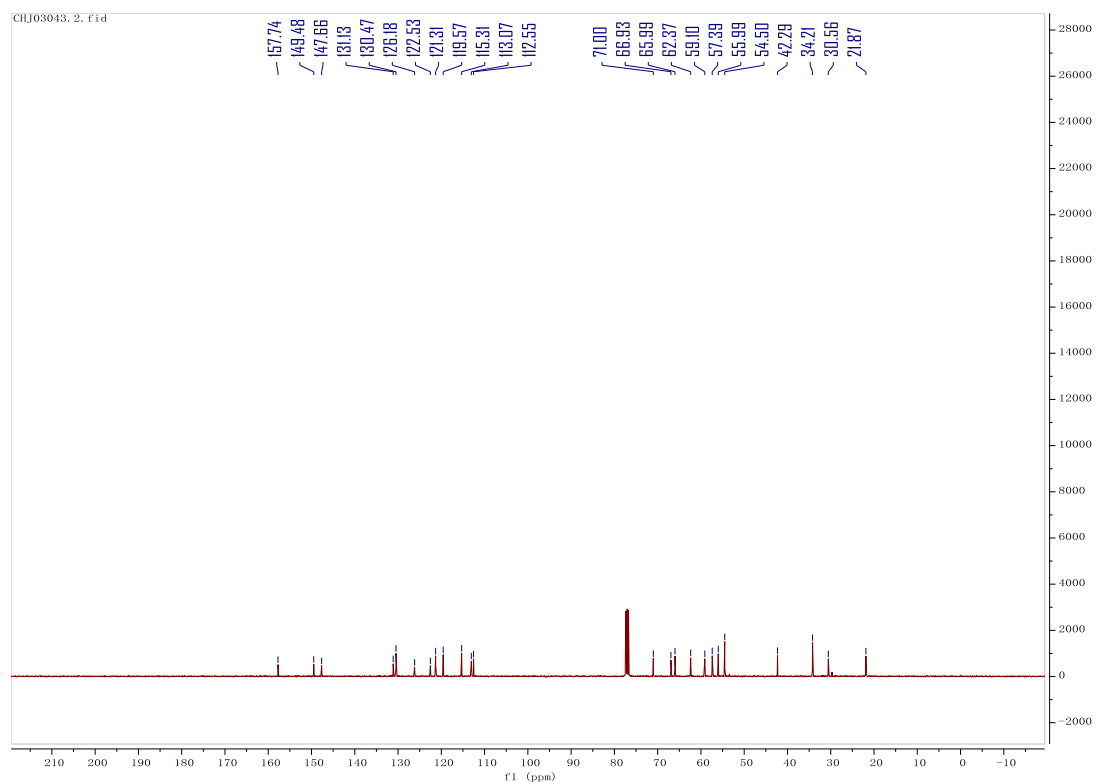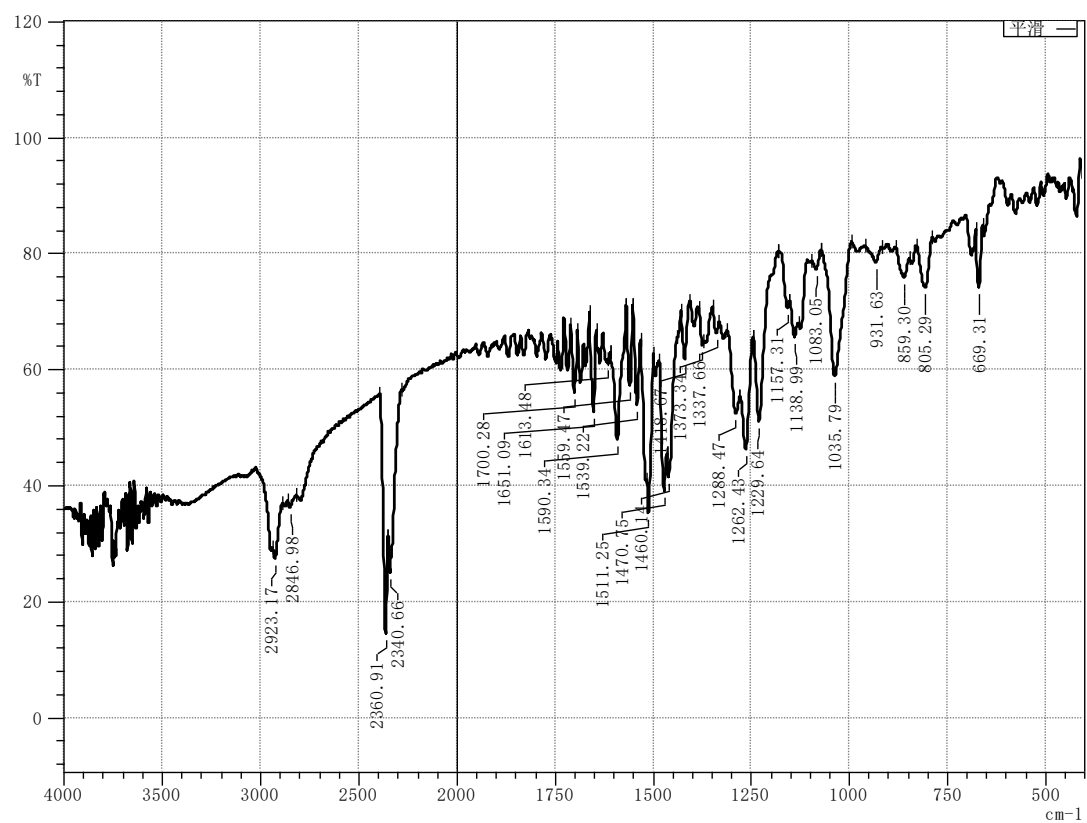

# **NMR (<sup>1</sup>H and <sup>13</sup>C) and IR (KBr) of Compound CHJ04010:**

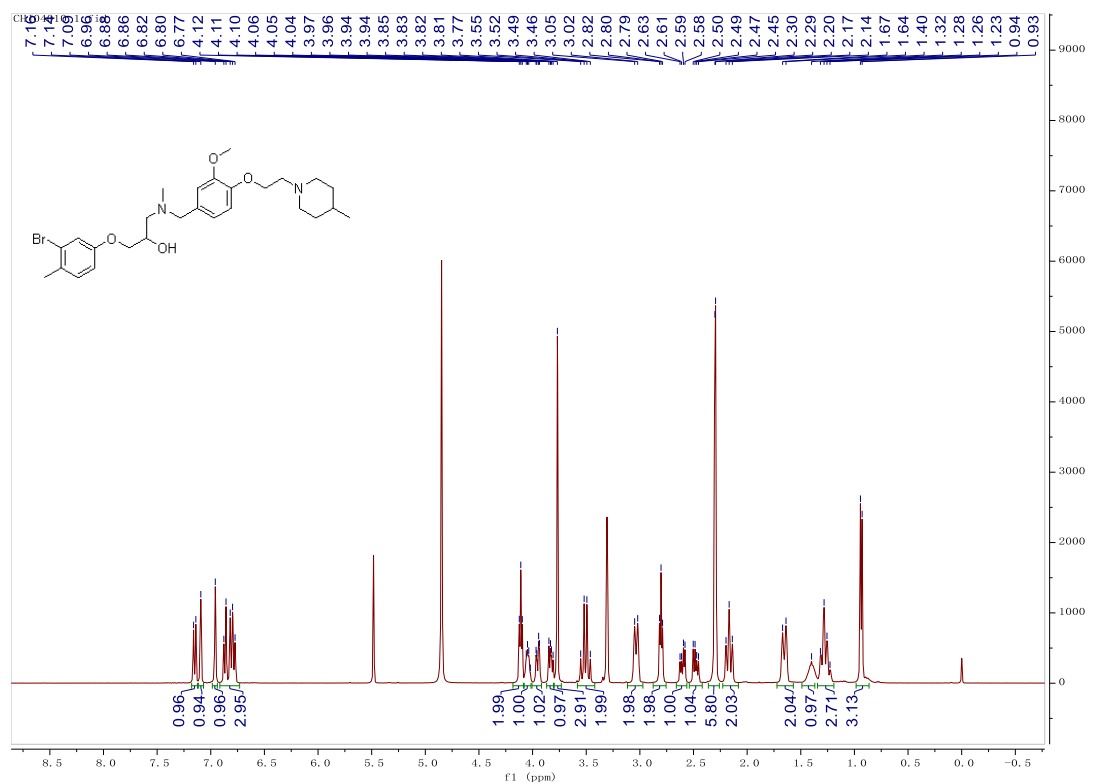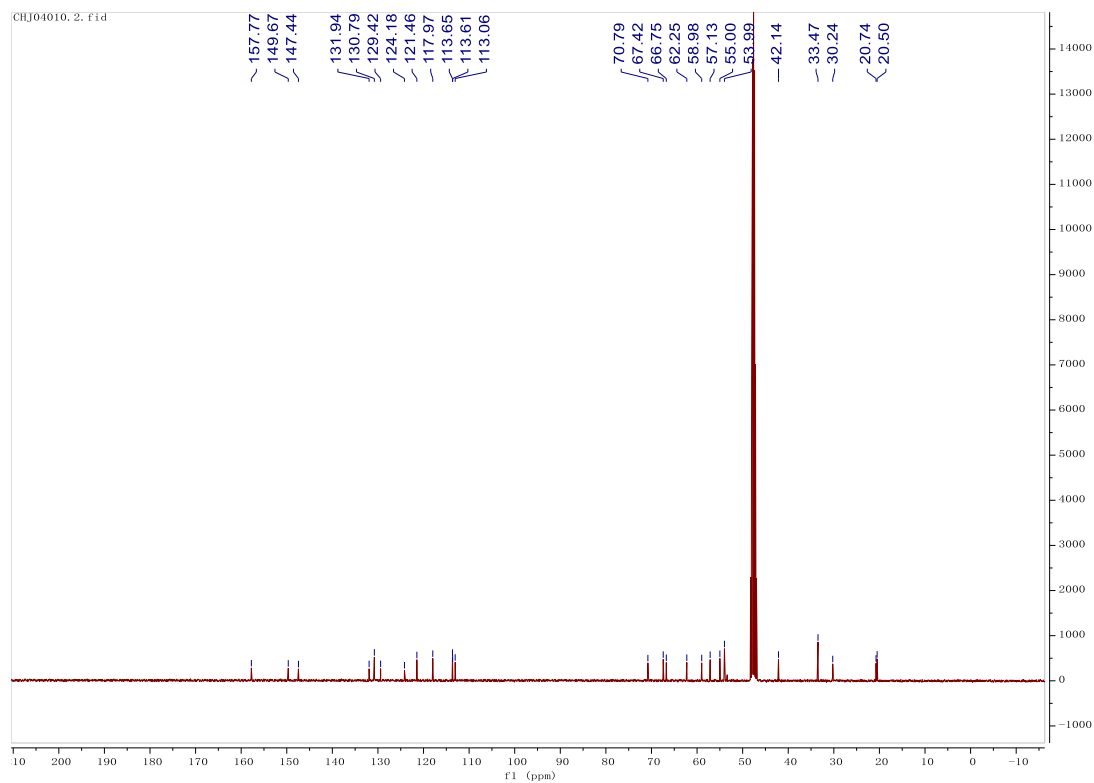



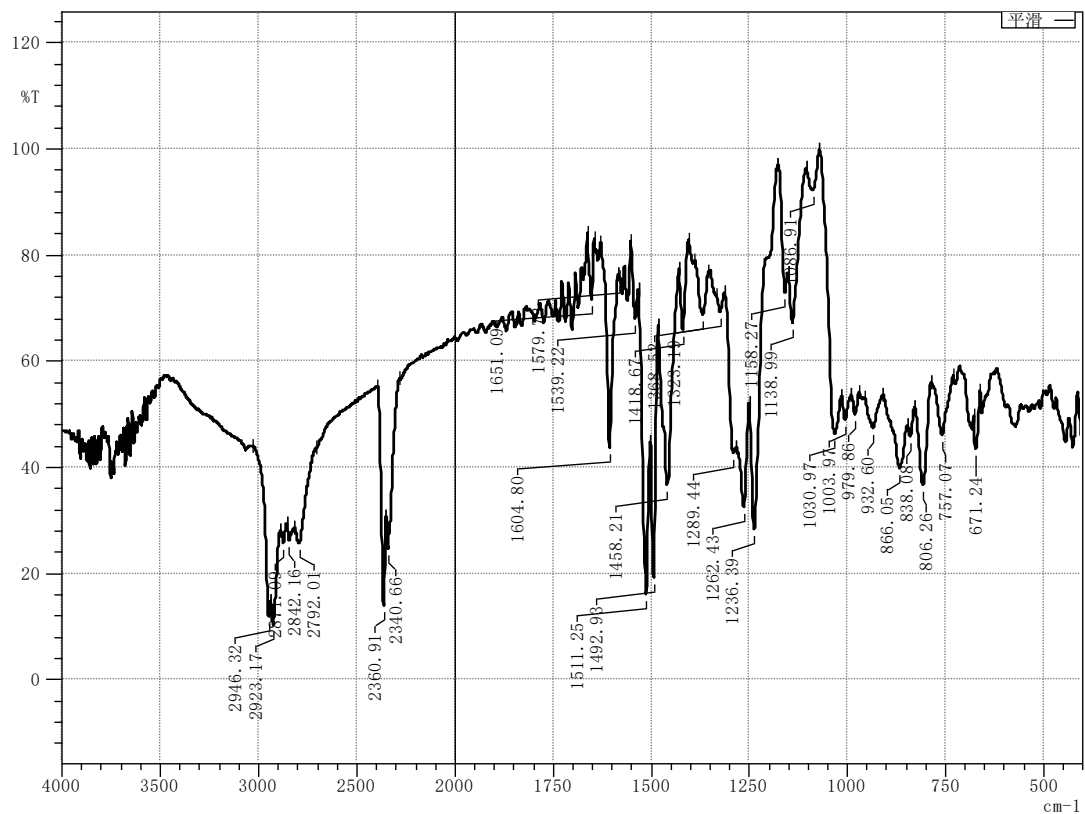

### NMR (<sup>1</sup>H and <sup>13</sup>C) and IR (KBr) of Compound CHJ04011:

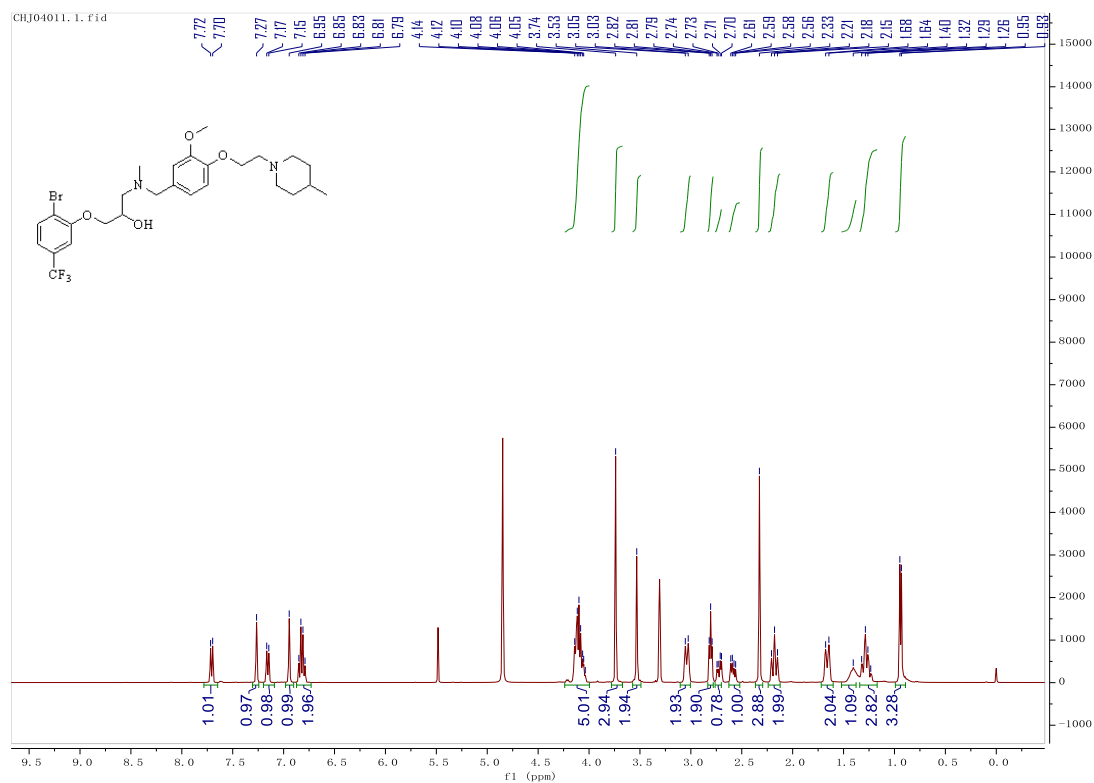

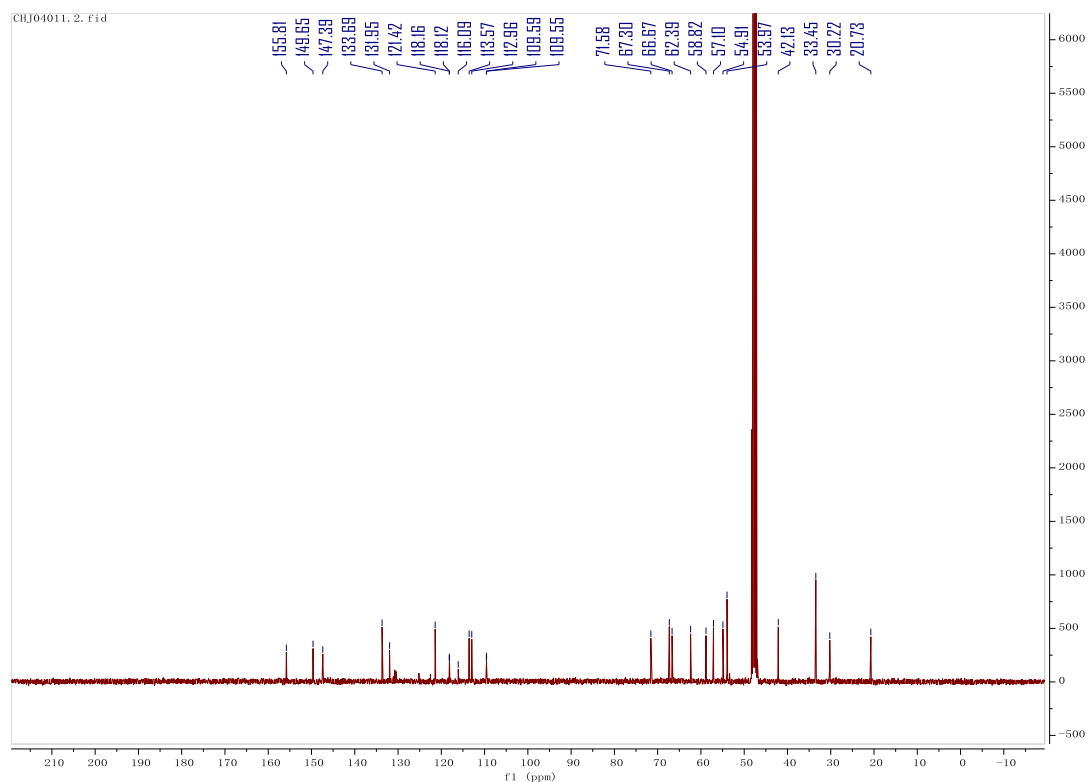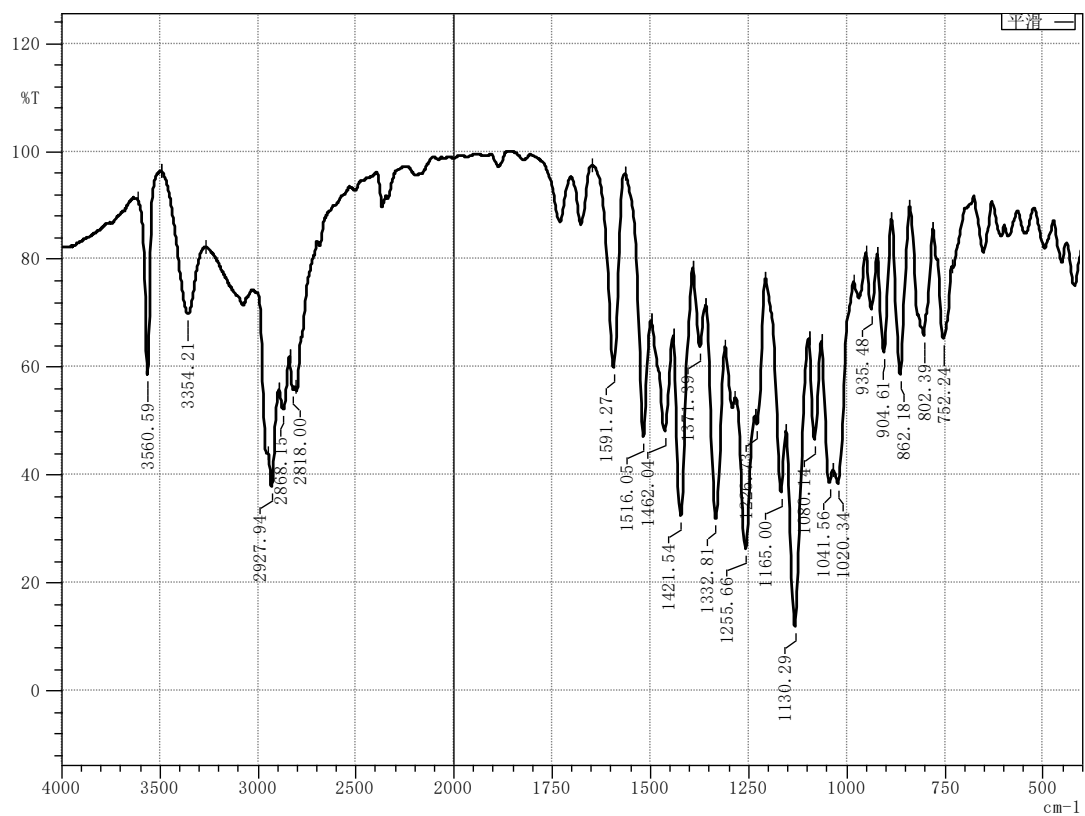

# **NMR (<sup>1</sup>H and <sup>13</sup>C) and IR (KBr) of Compound CHJ04012:**

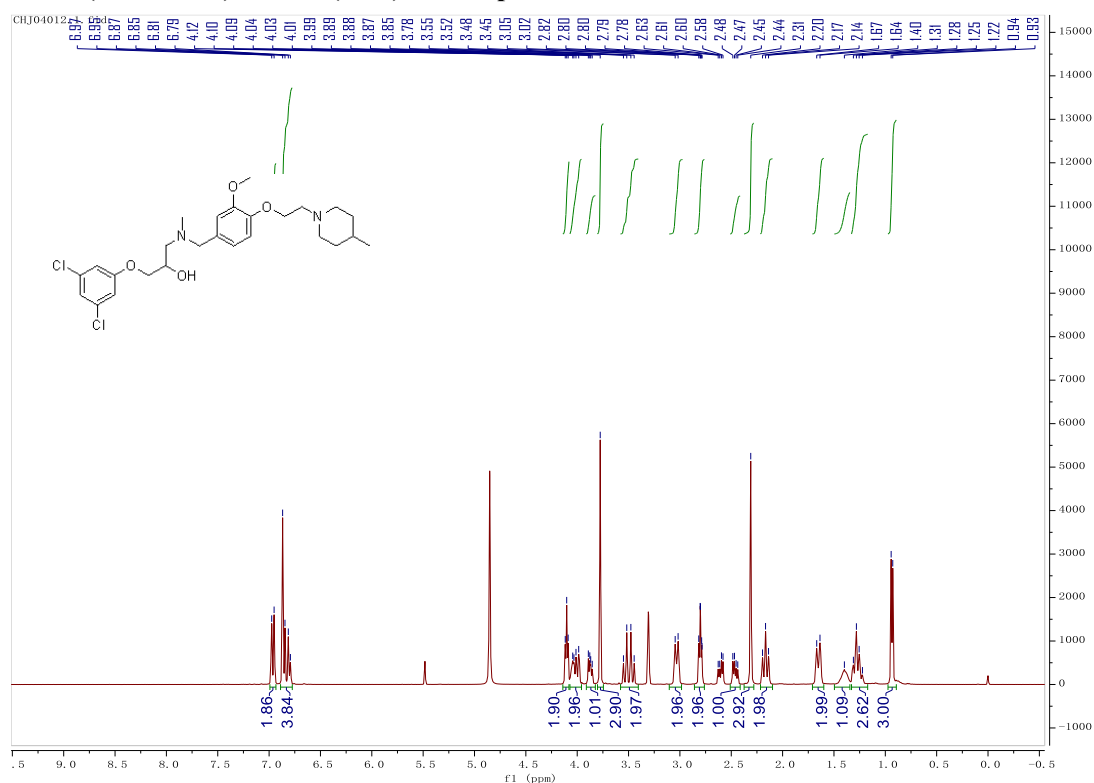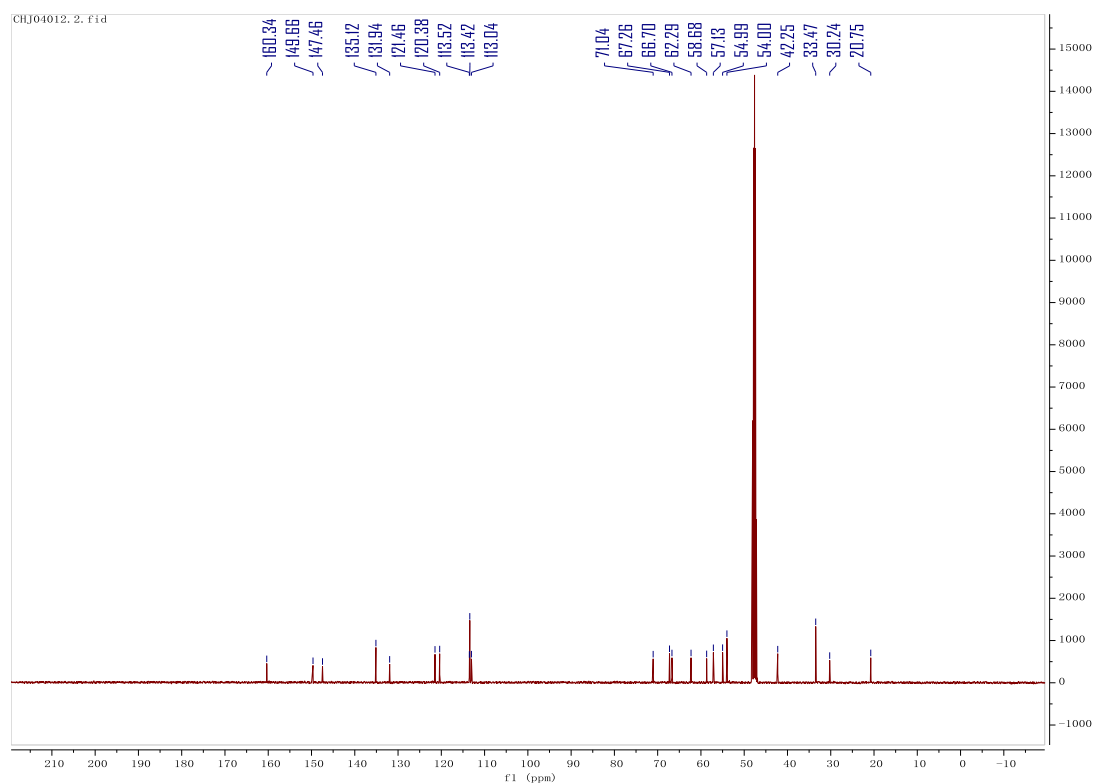

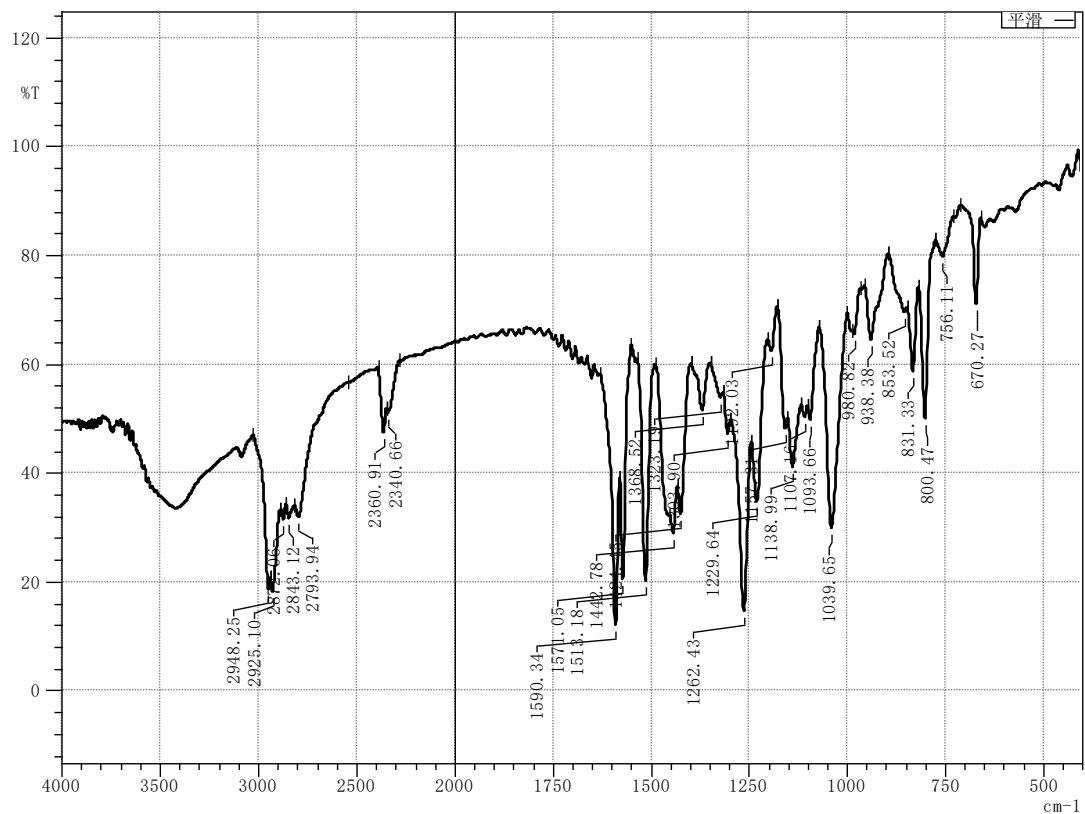

**NMR ( $^1\text{H}$  and  $^{13}\text{C}$ ) and IR (KBr) of Compound CHJ04020:**

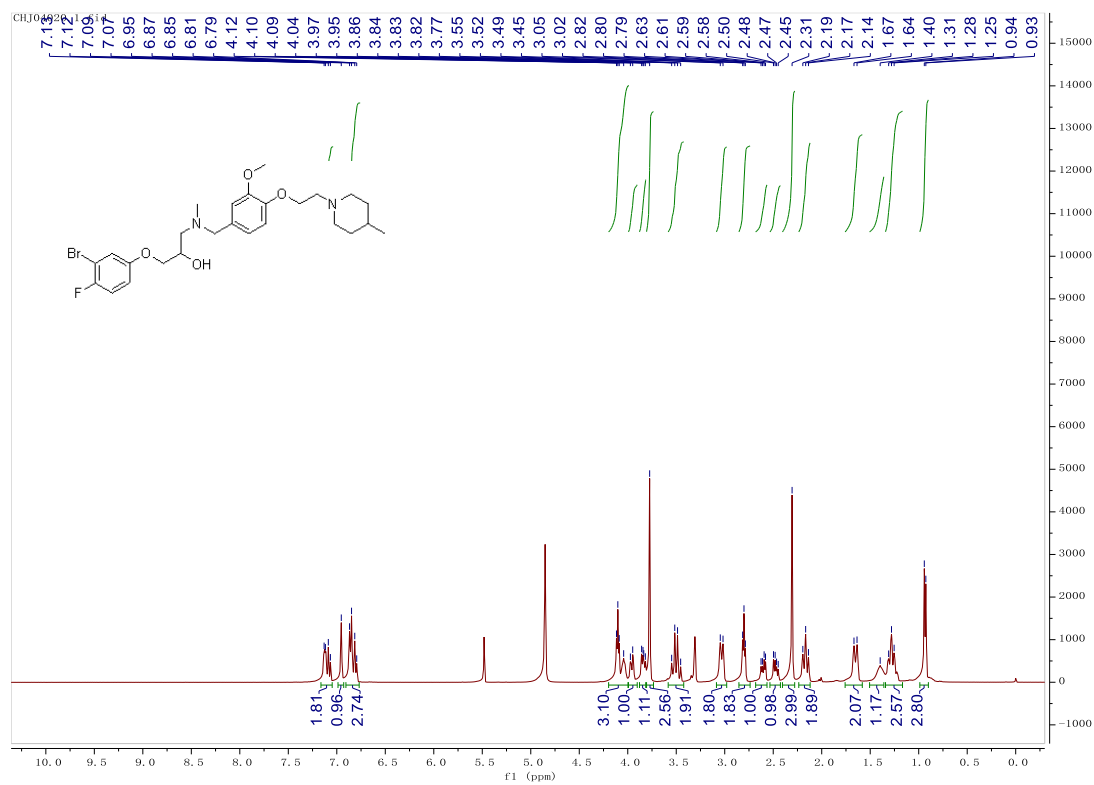

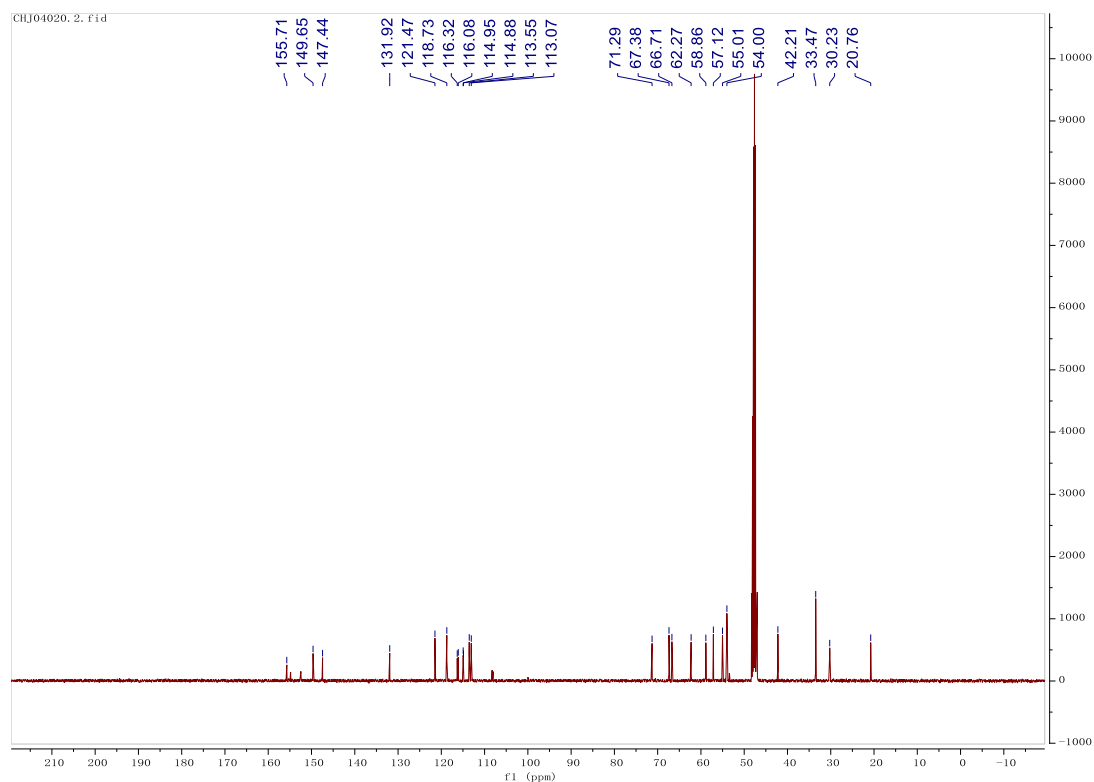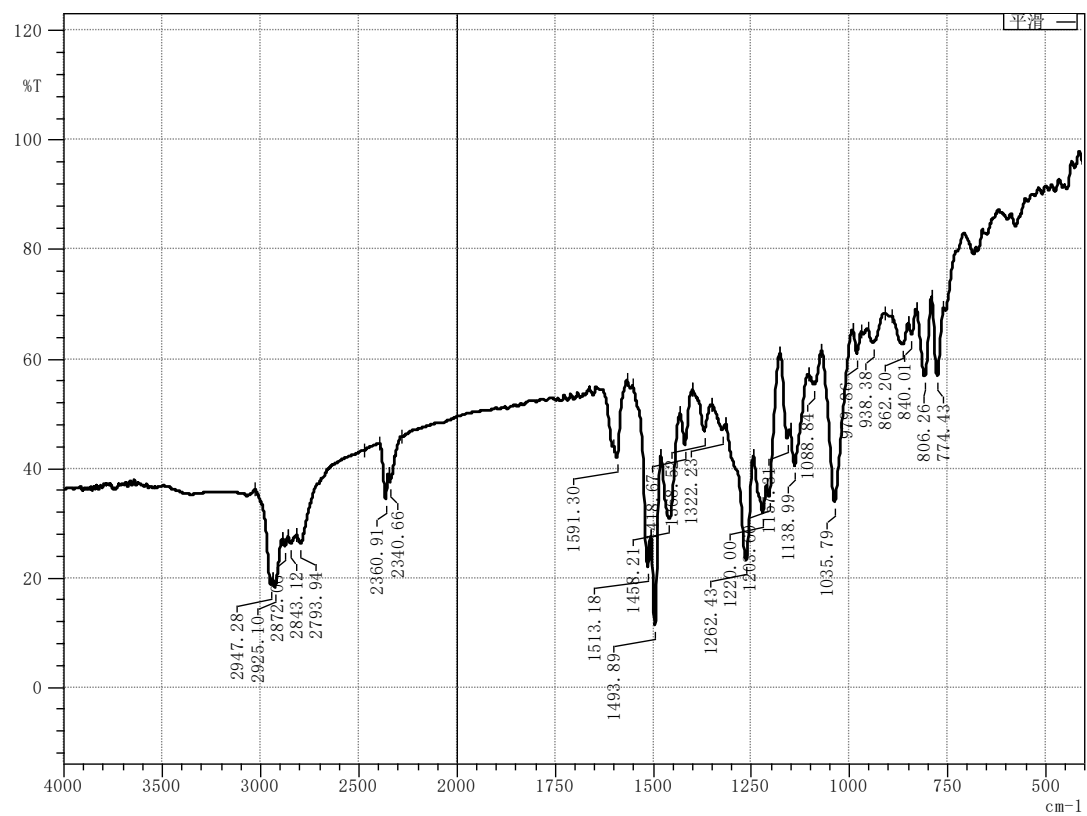

# NMR (<sup>1</sup>H and <sup>13</sup>C) and IR (KBr) of Compound CHJ04022:

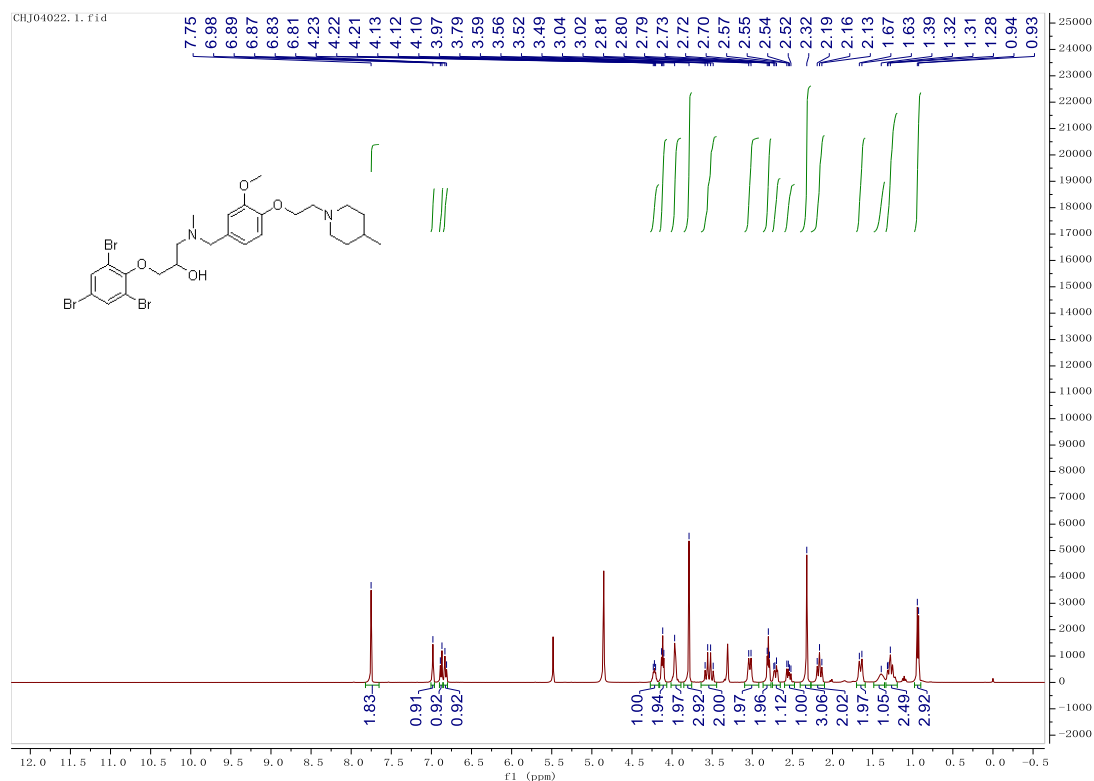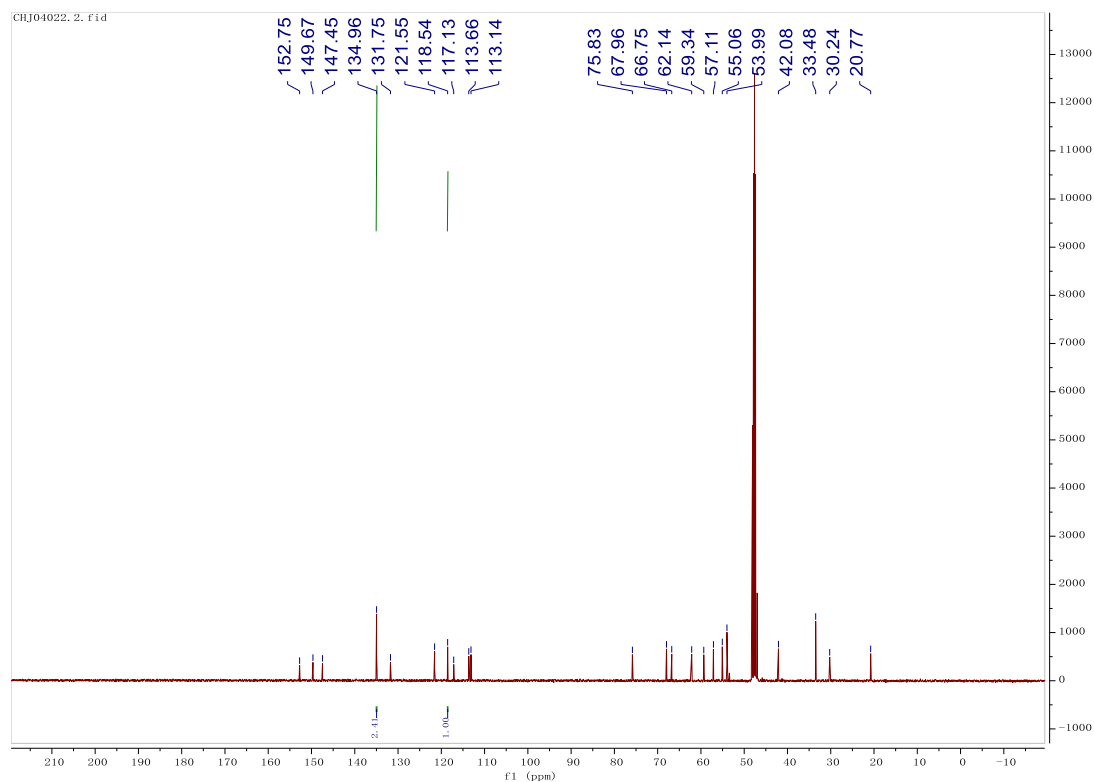

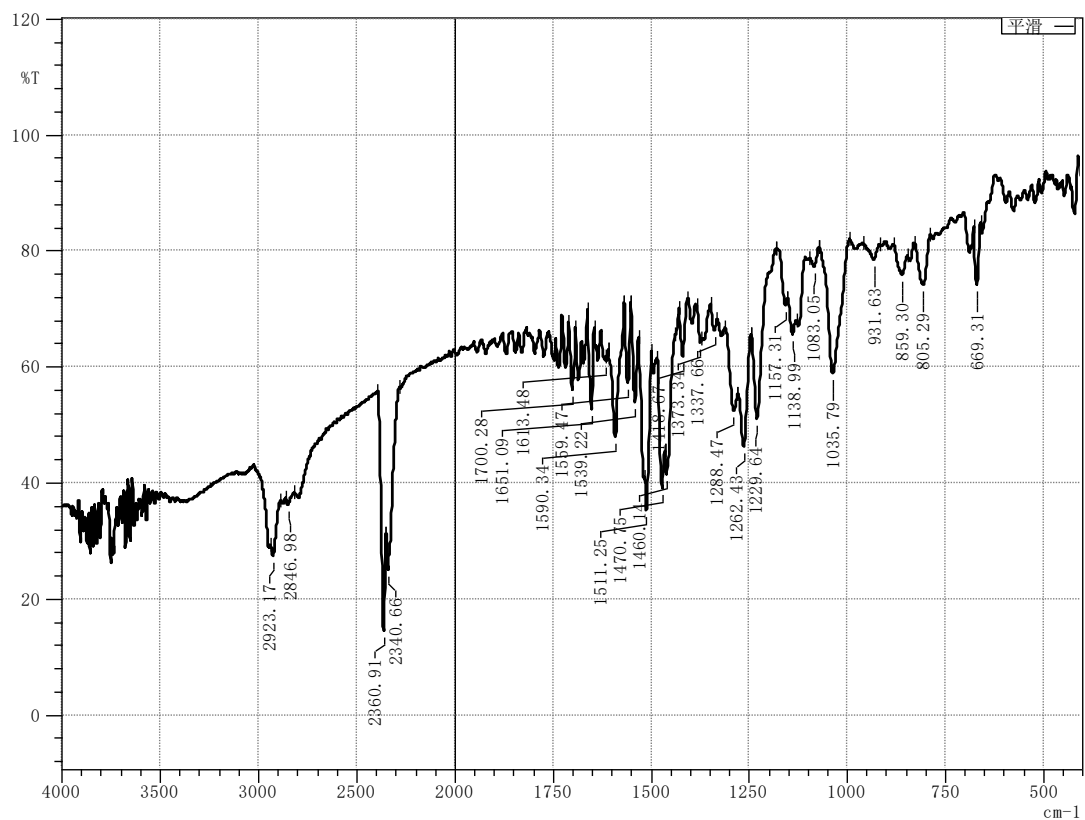

**NMR ( $^1\text{H}$  and  $^{13}\text{C}$ ) and IR (KBr) of Compound CHJ04023:**

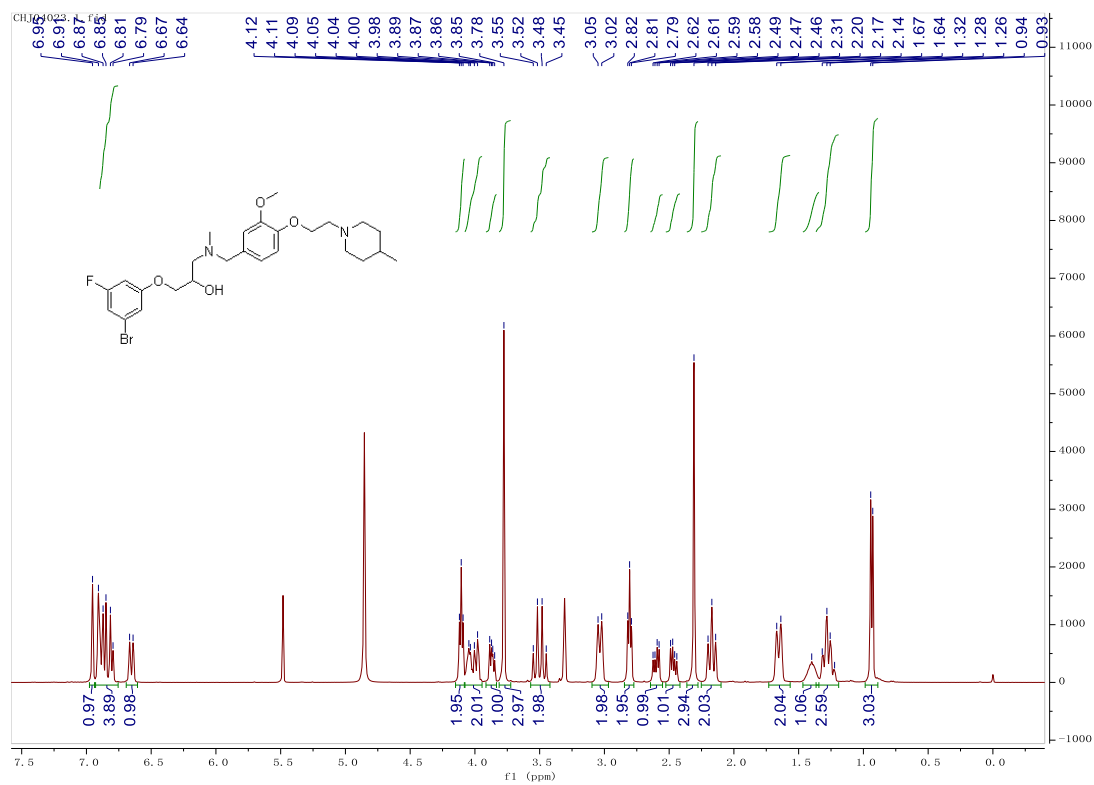

CHJ04023, 2, fid

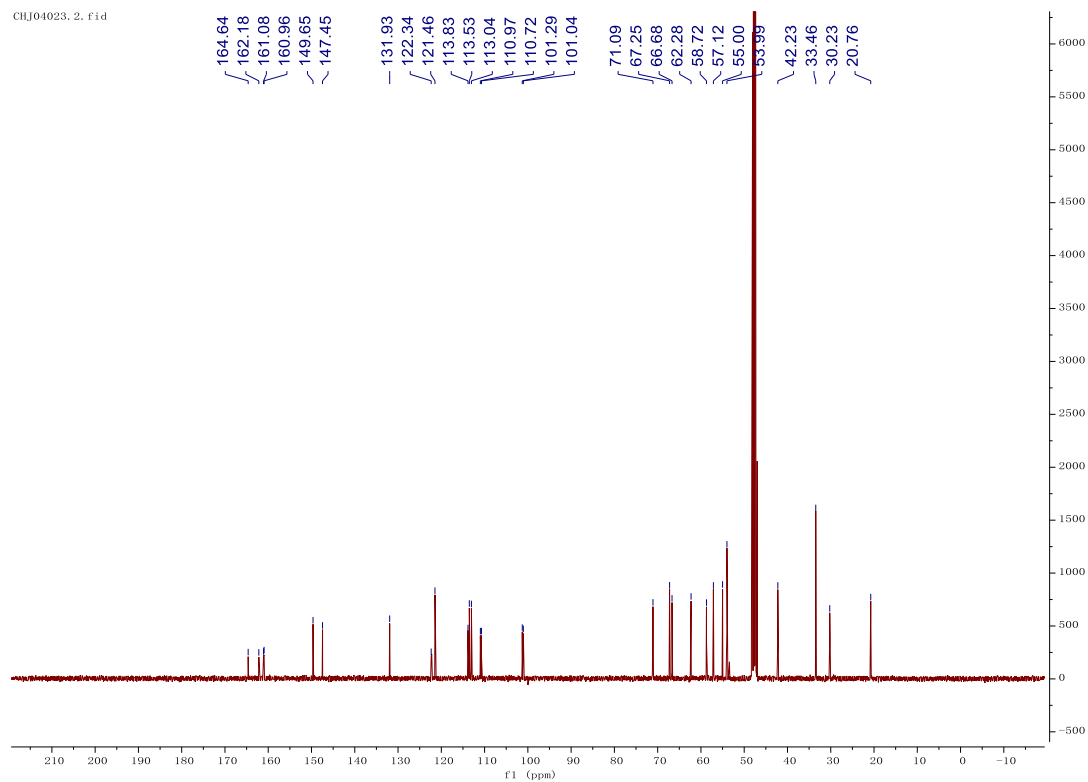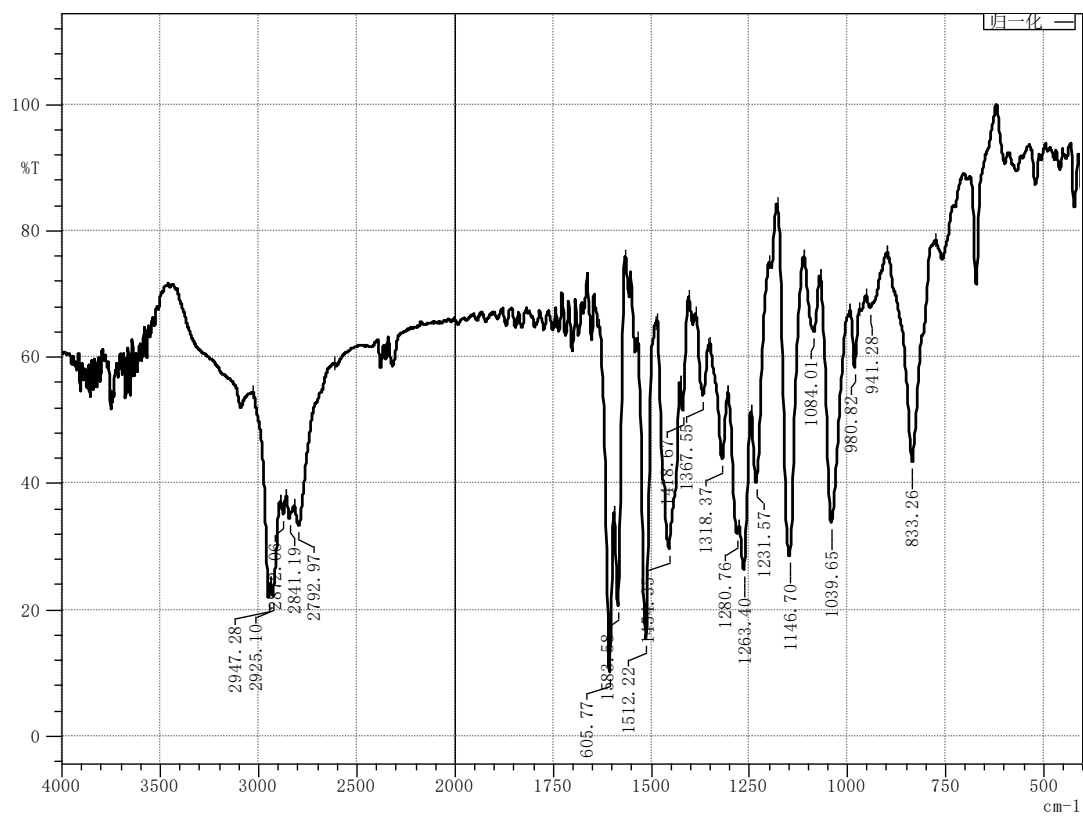



# **NMR (<sup>1</sup>H and <sup>13</sup>C) and IR (KBr) of Compound CHJ04024:**

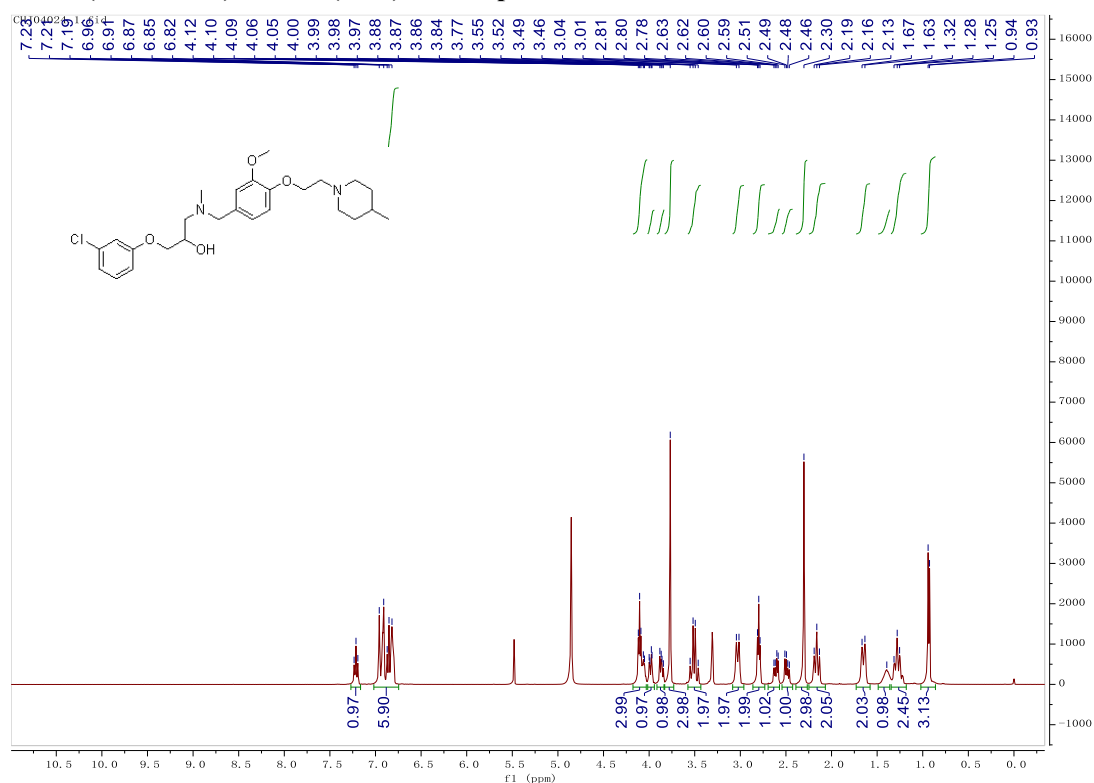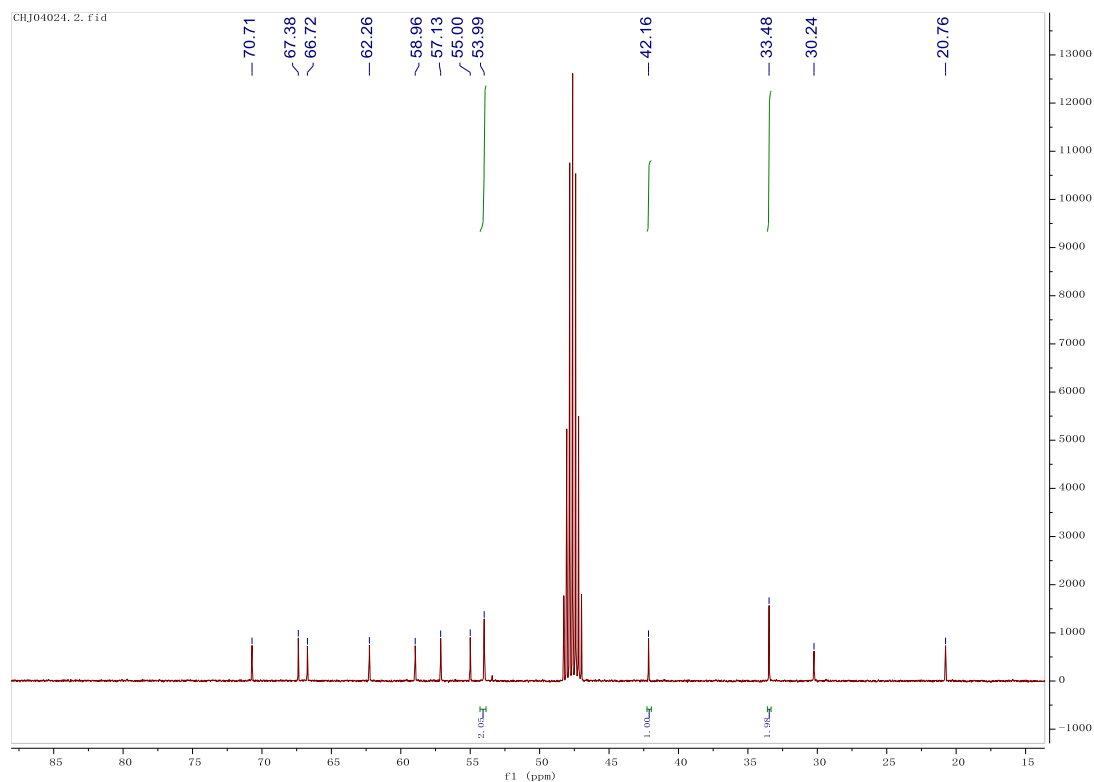

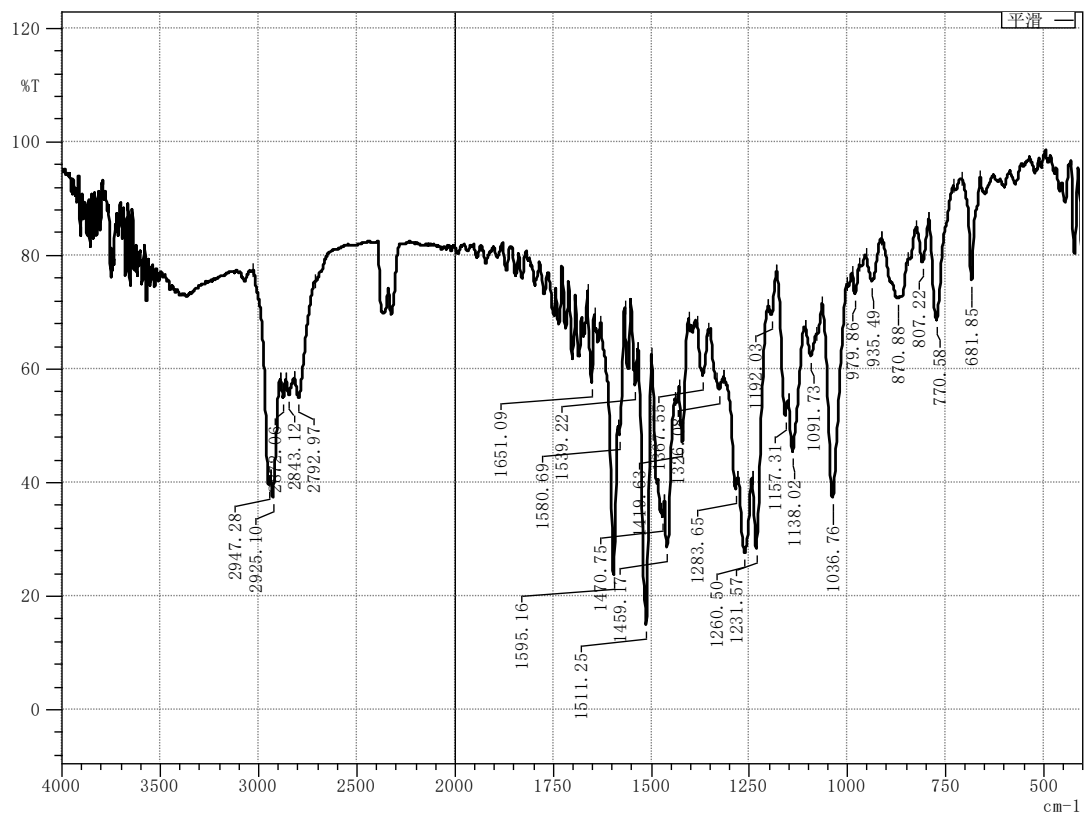

**NMR ( $^1\text{H}$  and  $^{13}\text{C}$ ) and IR (KBr) of Compound CHJ04025:**

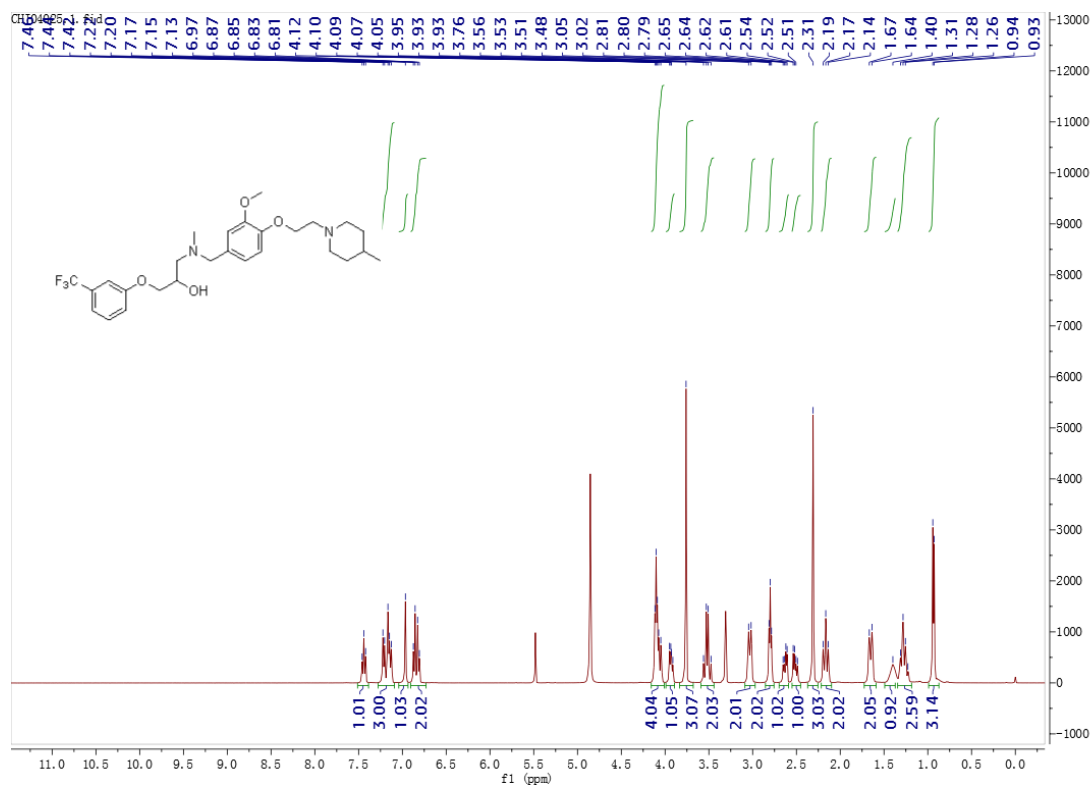

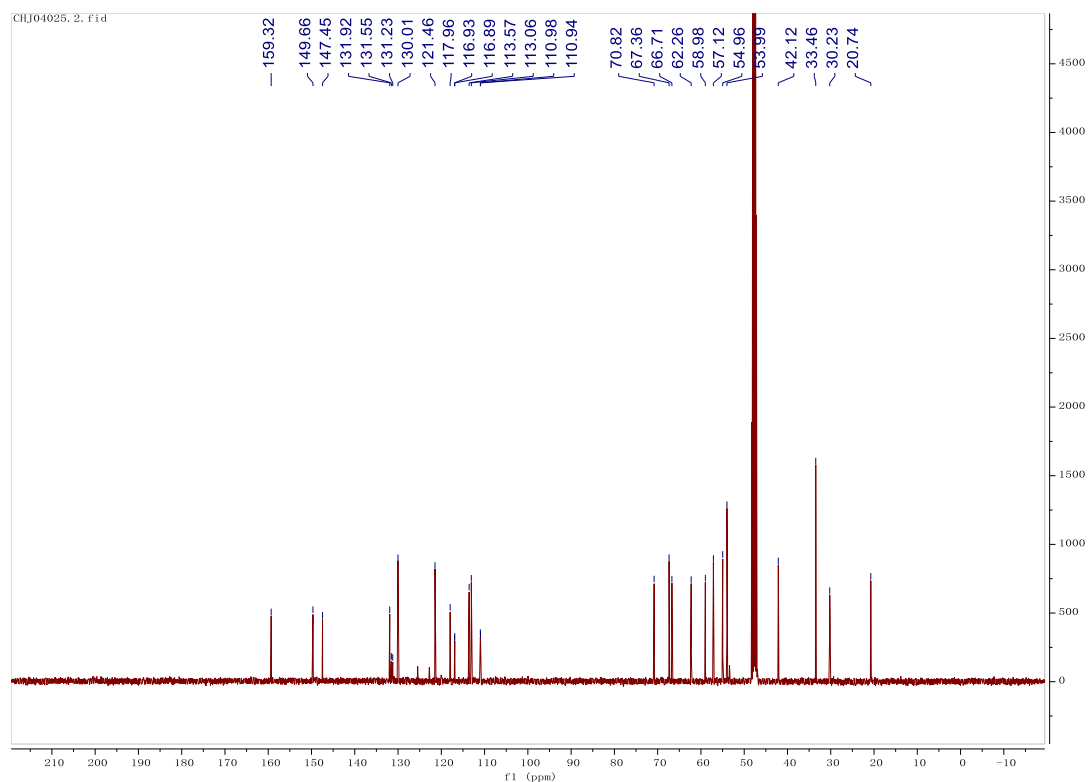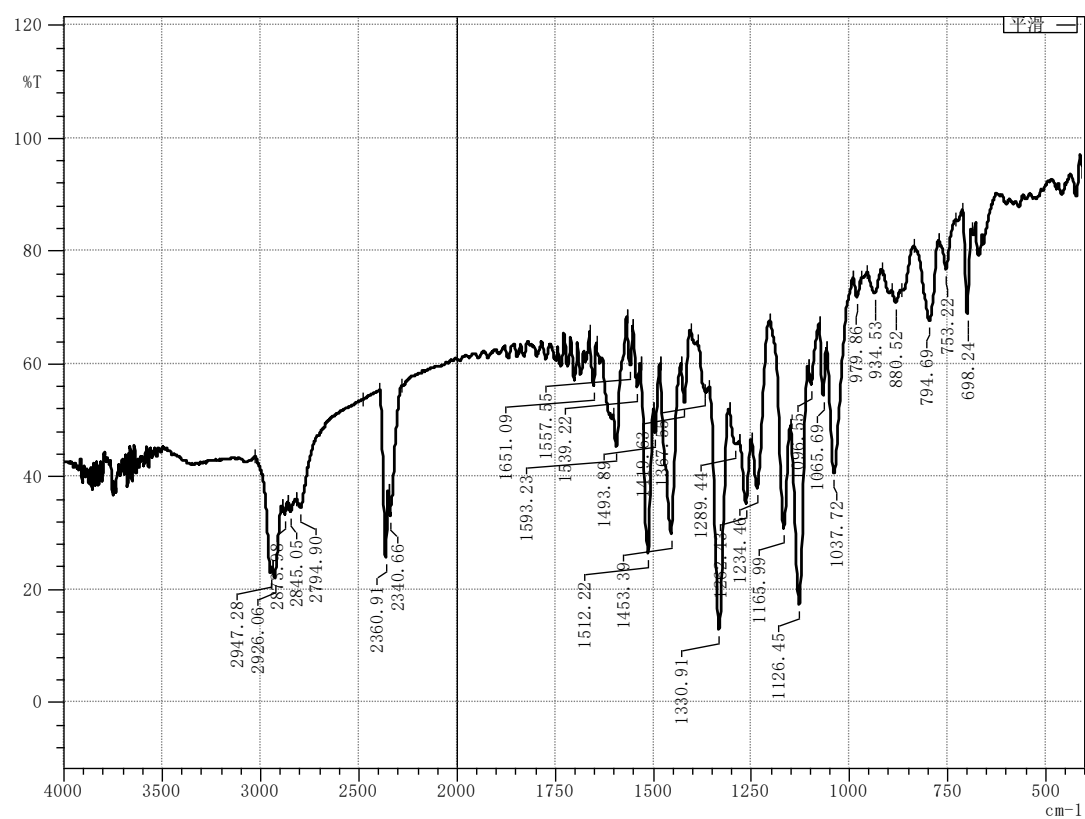

# **NMR (<sup>1</sup>H and <sup>13</sup>C) and IR (KBr) of Compound CHJ04026:**

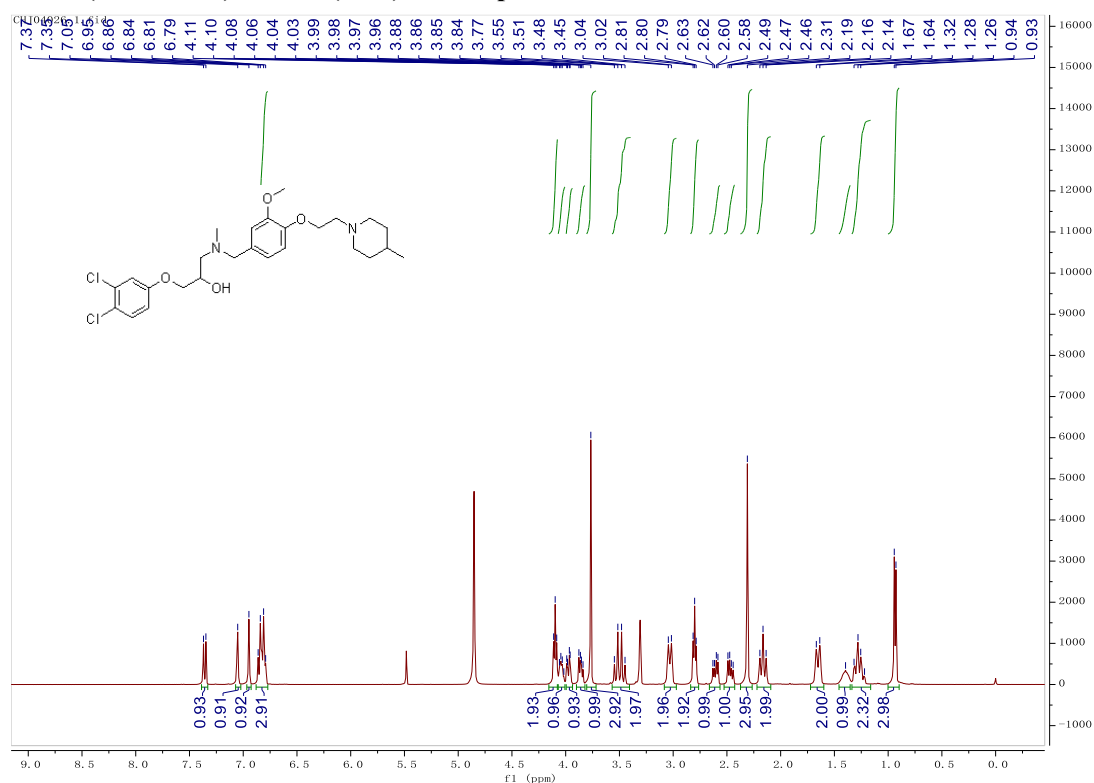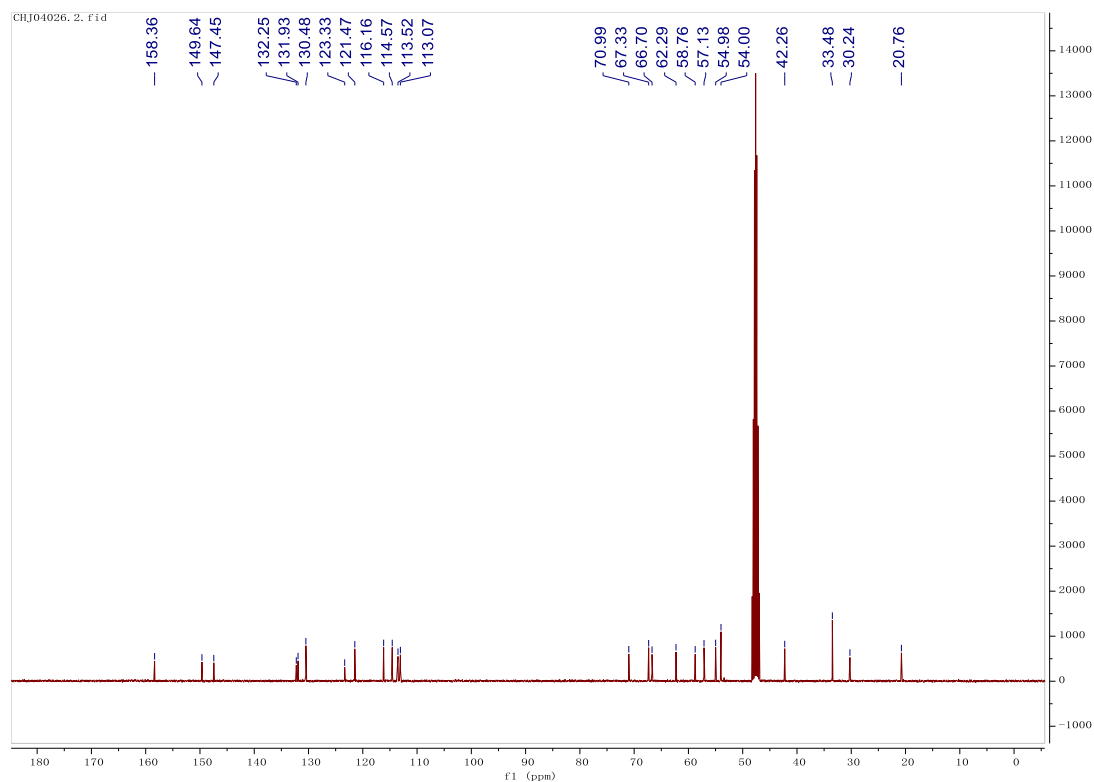



**NMR (<sup>1</sup>H and <sup>13</sup>C) and IR (KBr) of Compound CHJ04027:**

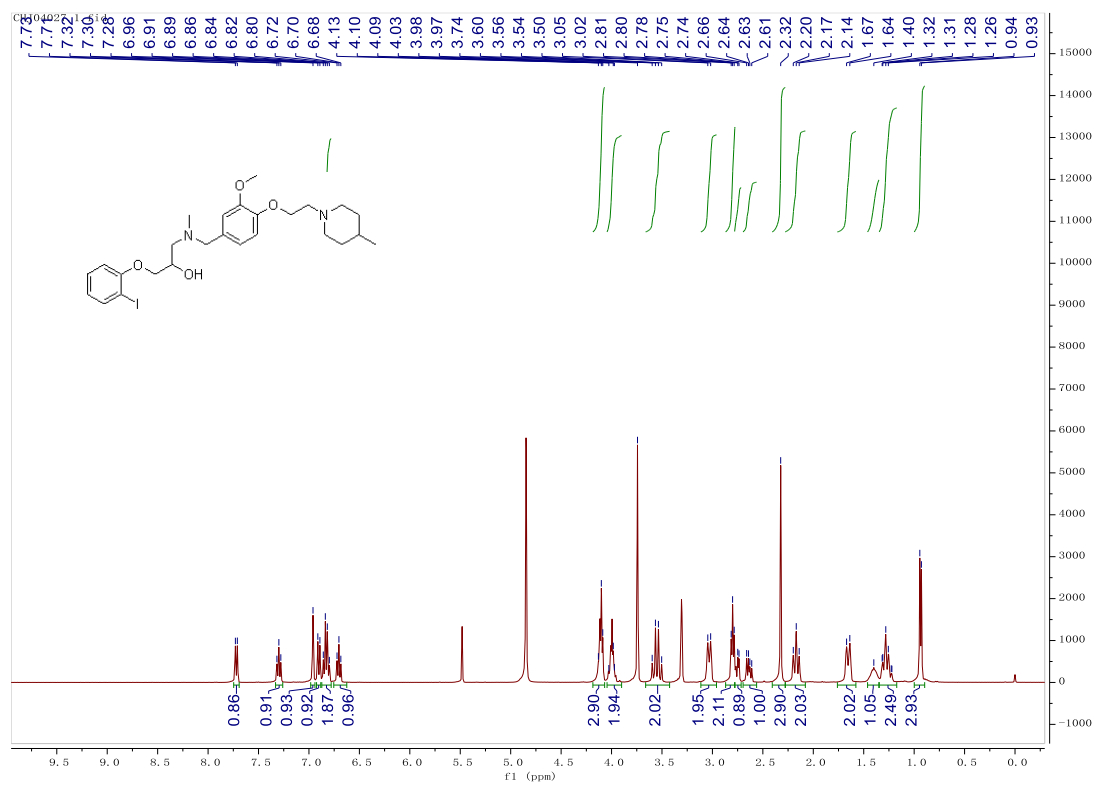

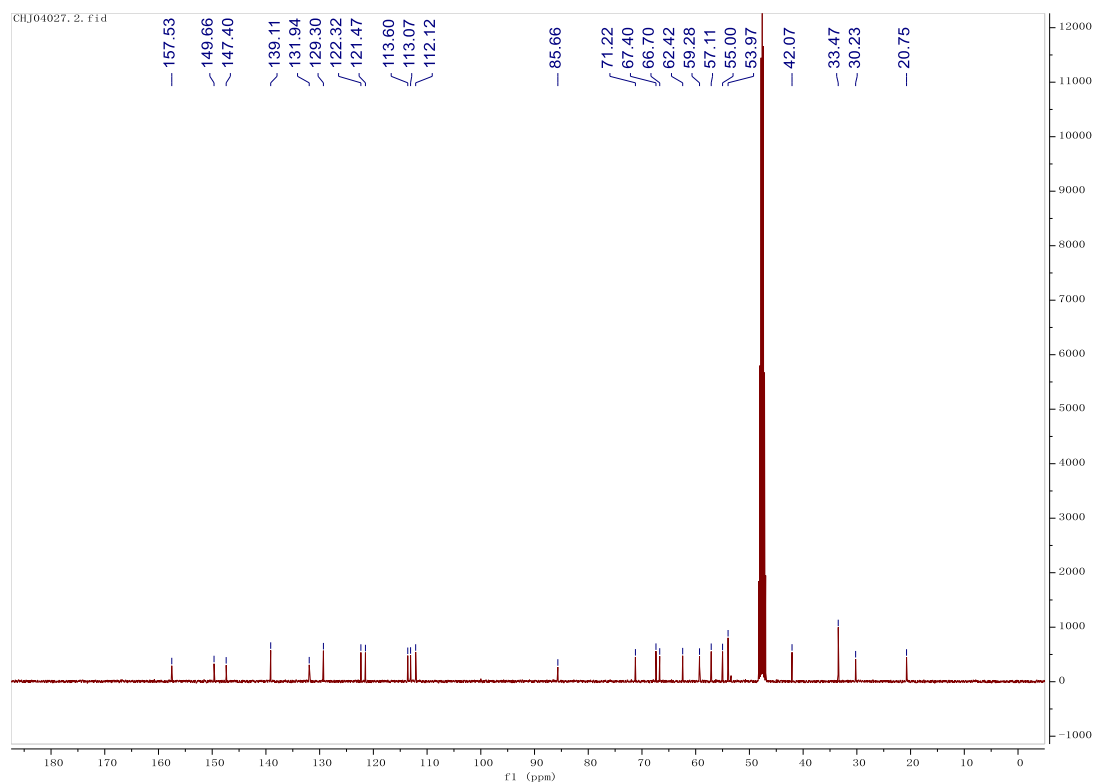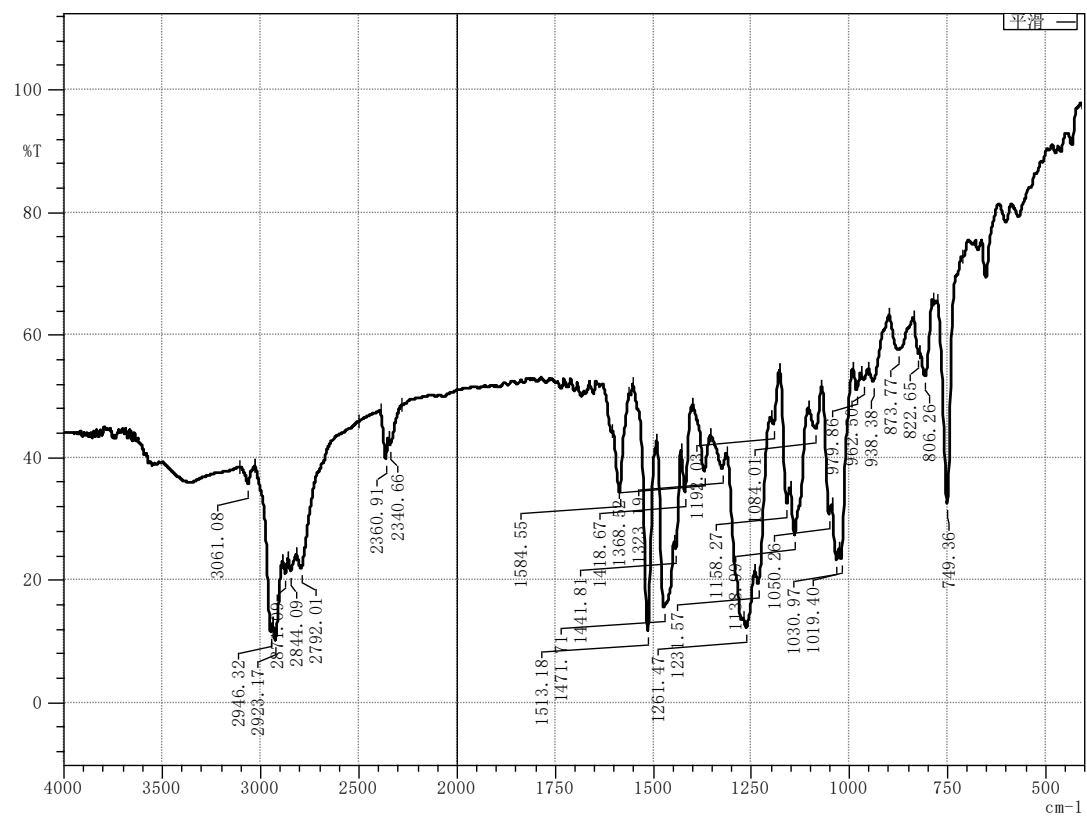

**NMR (<sup>1</sup>H and <sup>13</sup>C) and IR (KBr) of Compound CHJ04033:**

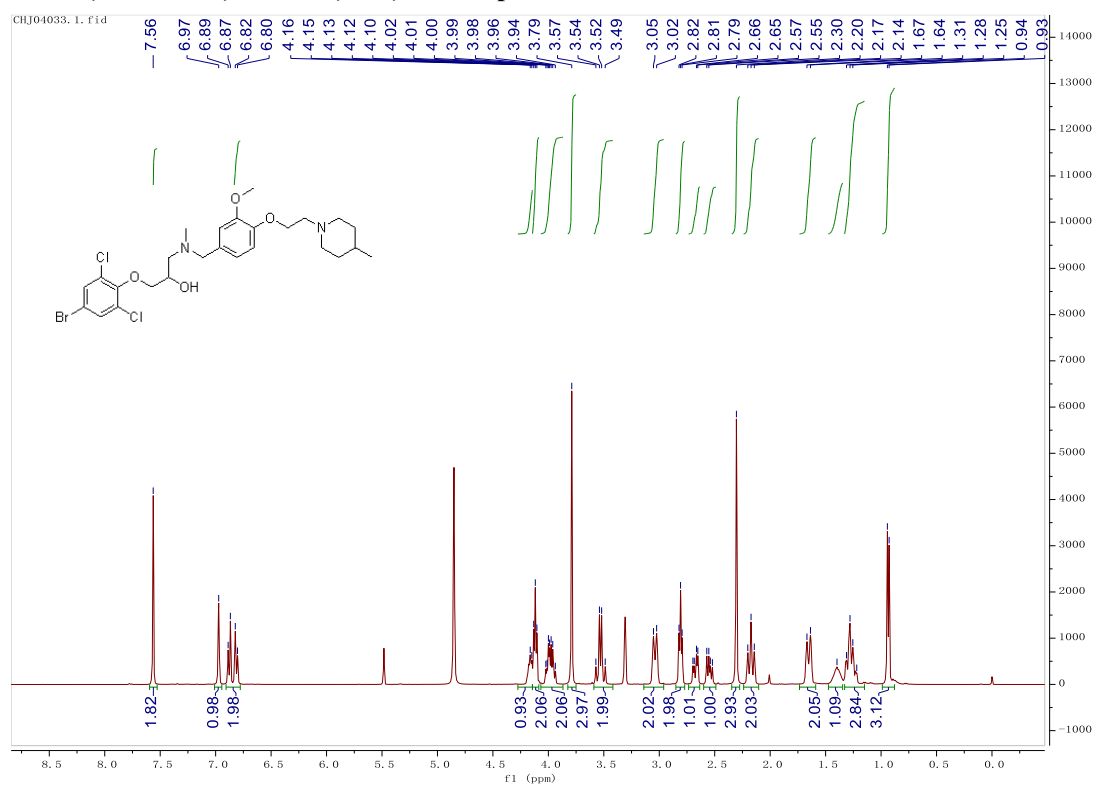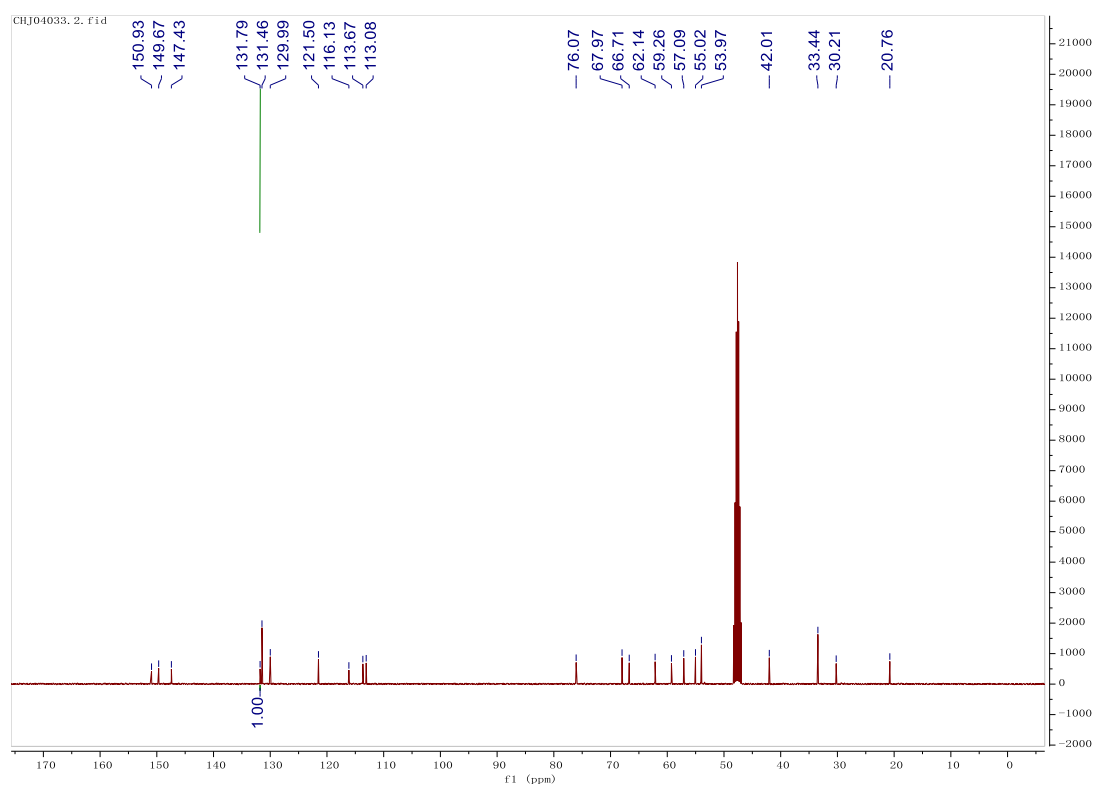

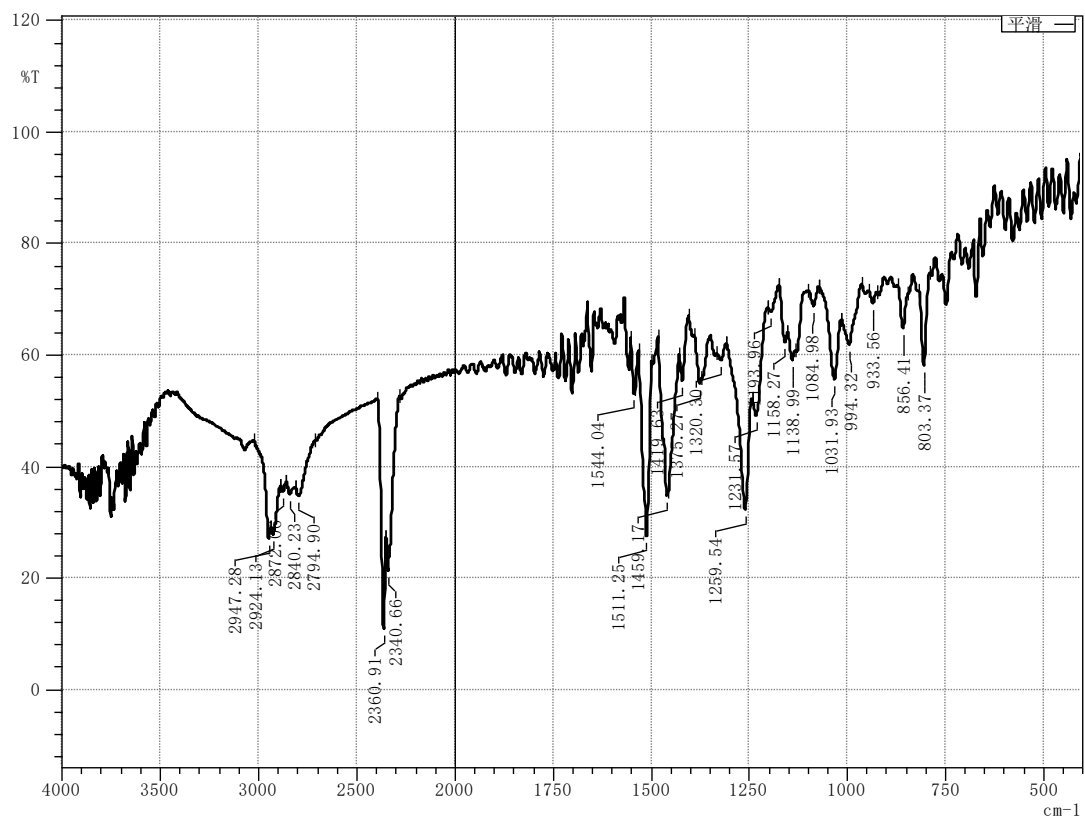

**NMR ( $^1\text{H}$  and  $^{13}\text{C}$ ) and IR (KBr) of Compound CHJ04034:**

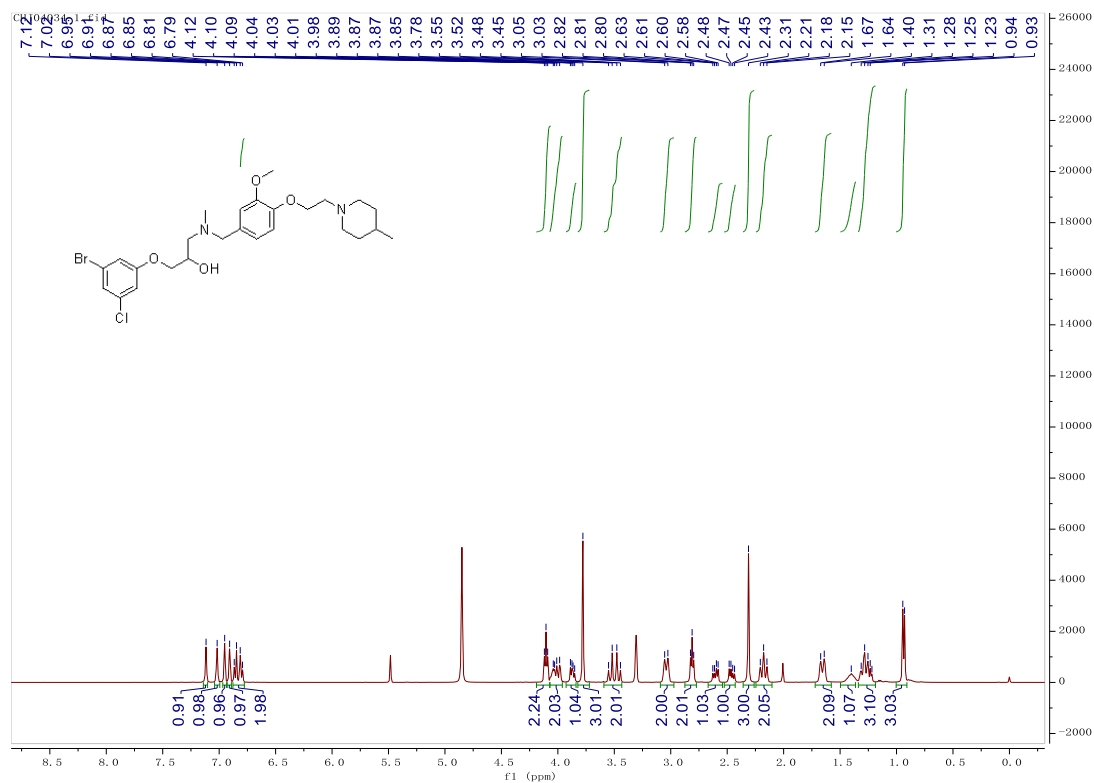



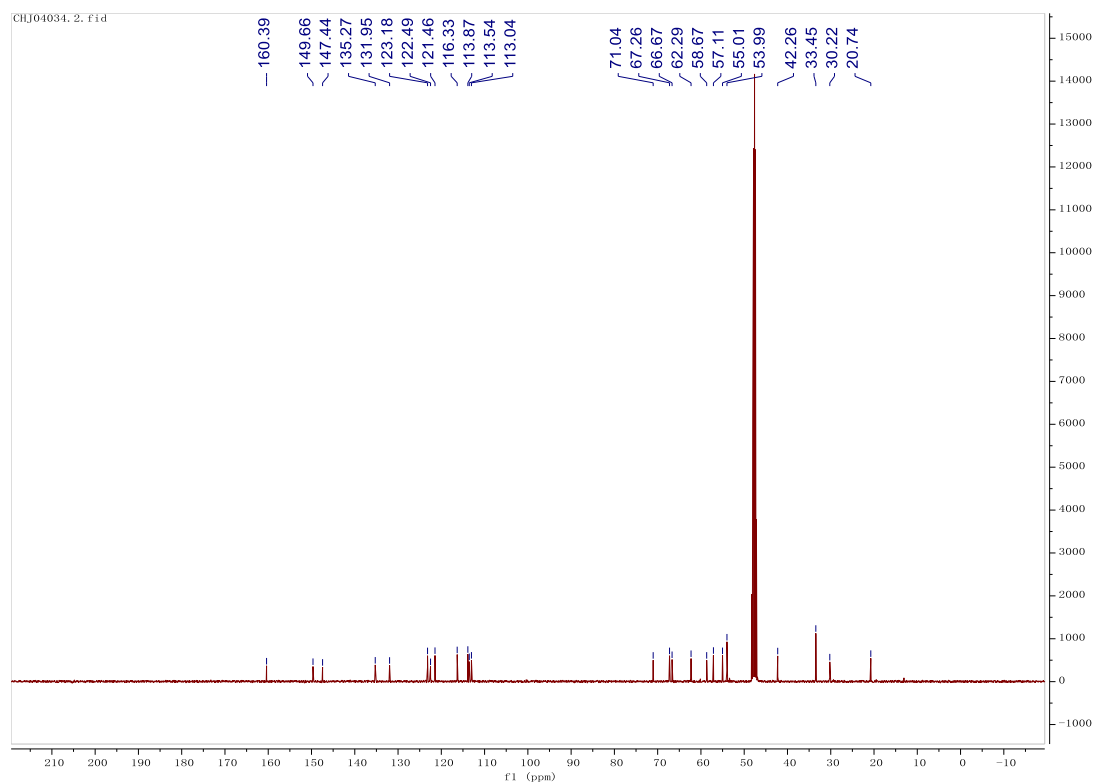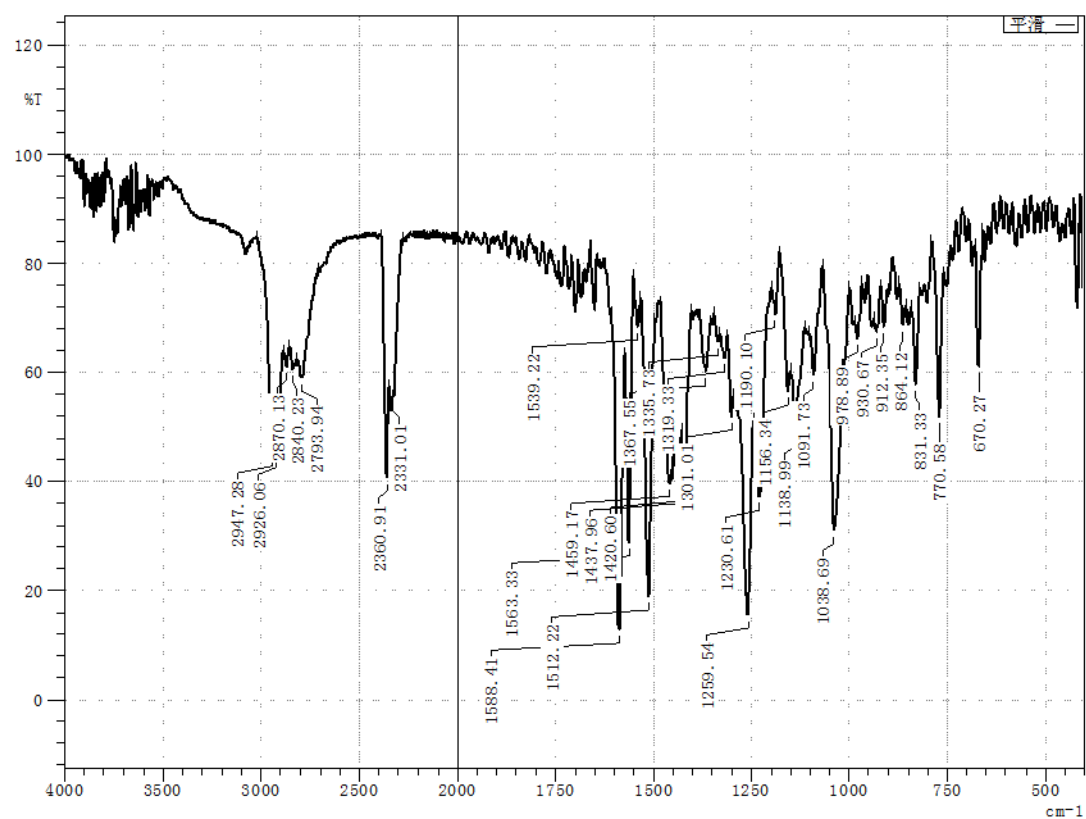

# NMR (<sup>1</sup>H and <sup>13</sup>C) and IR (KBr) of Compound CHJ04036:

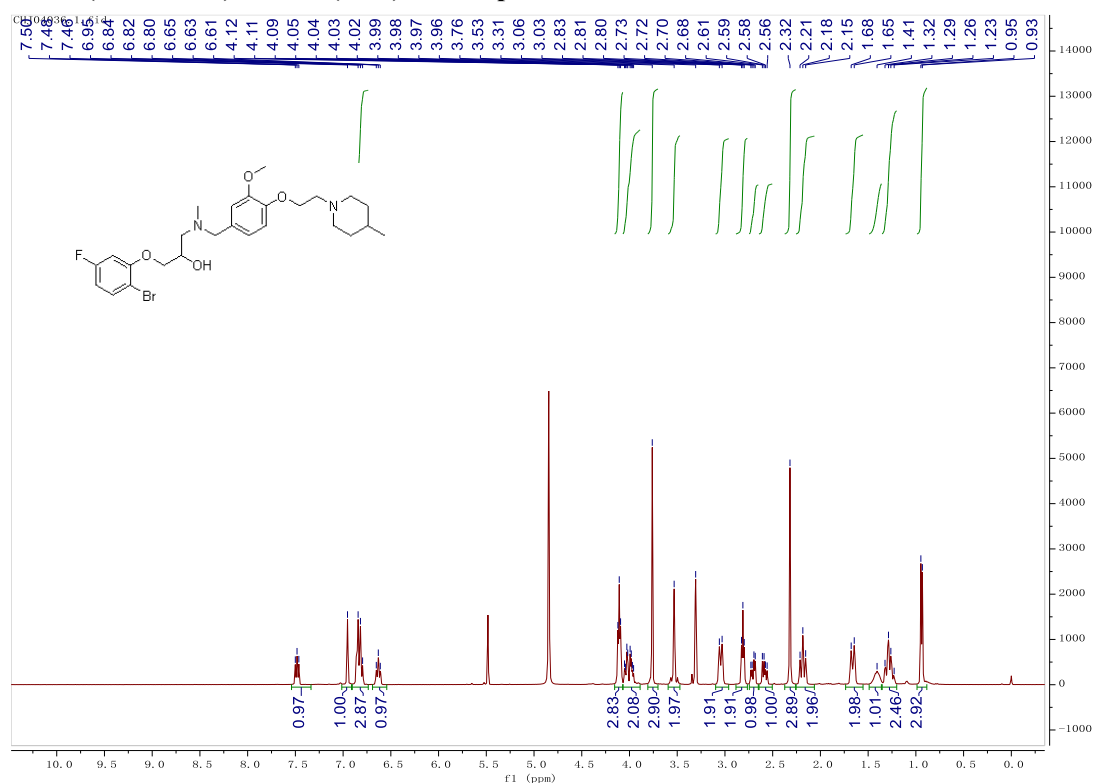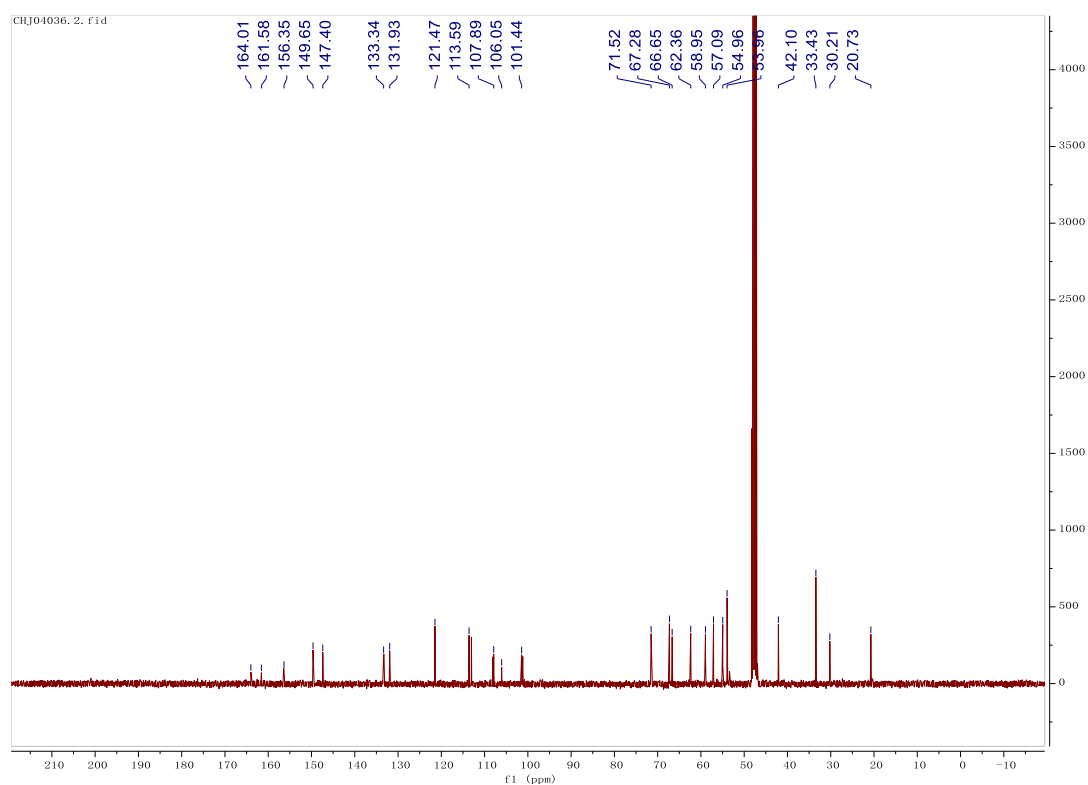

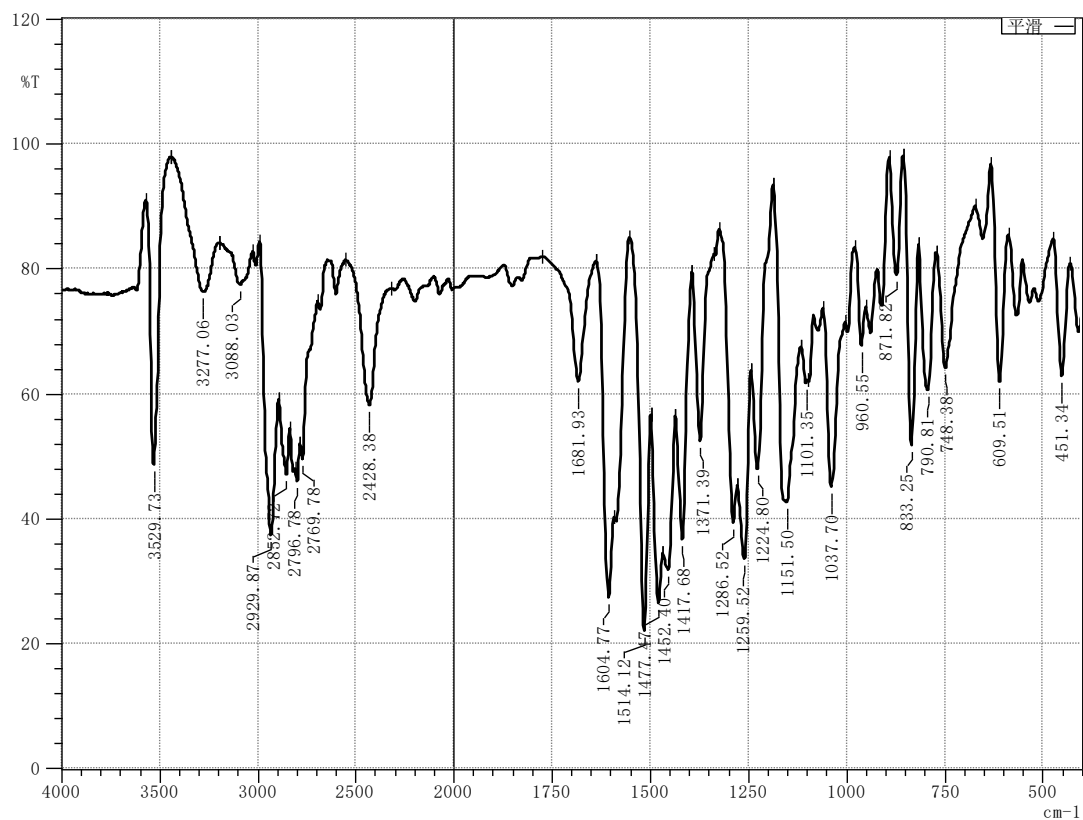

**NMR ( $^1\text{H}$  and  $^{13}\text{C}$ ) and IR (KBr) of Compound CHJ04058:**

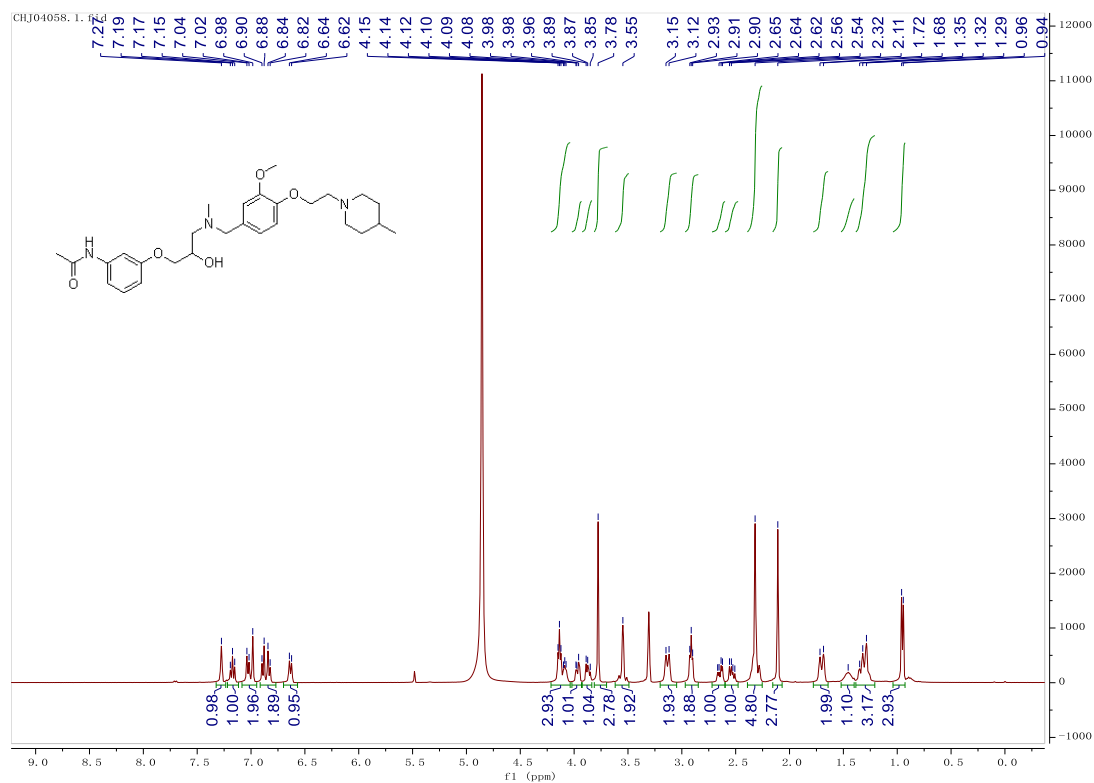

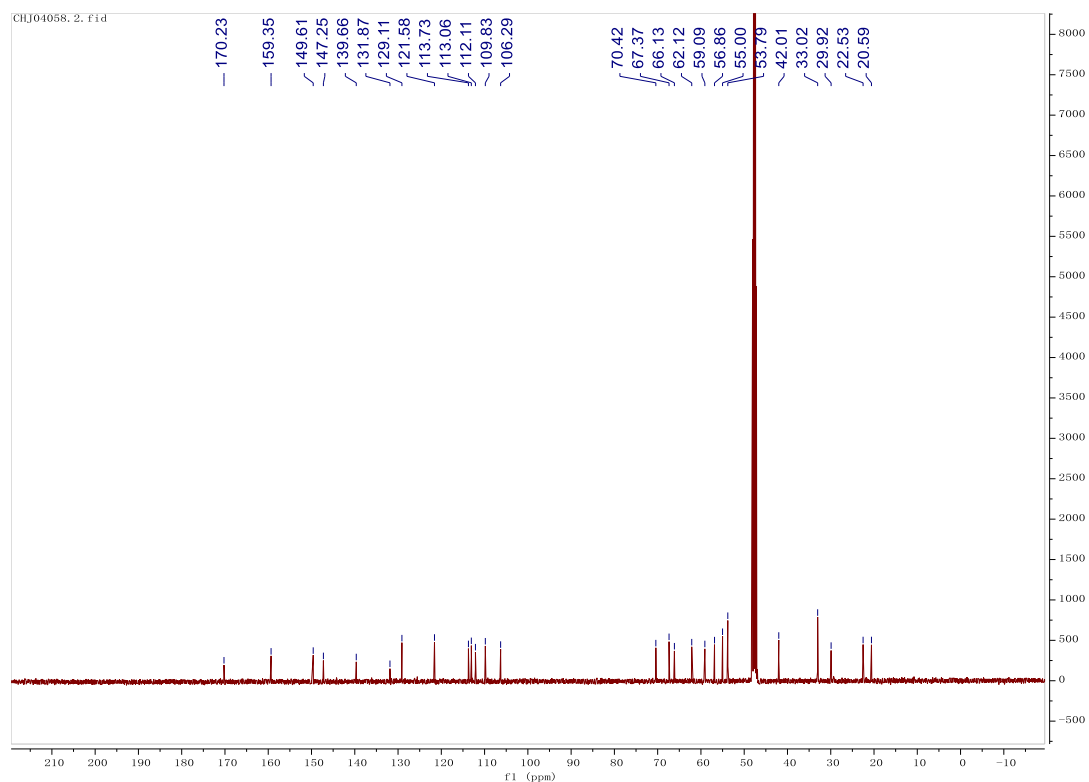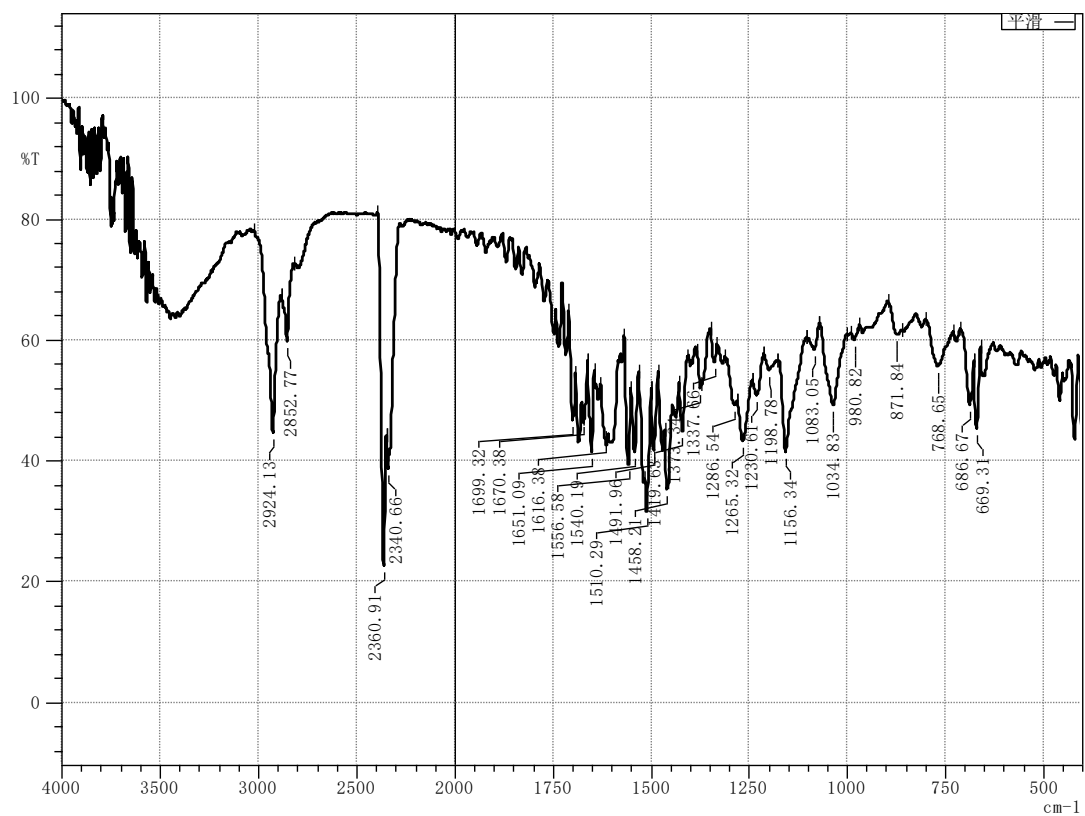

# **NMR (<sup>1</sup>H and <sup>13</sup>C) and IR (KBr) of Compound CHJ04059:**

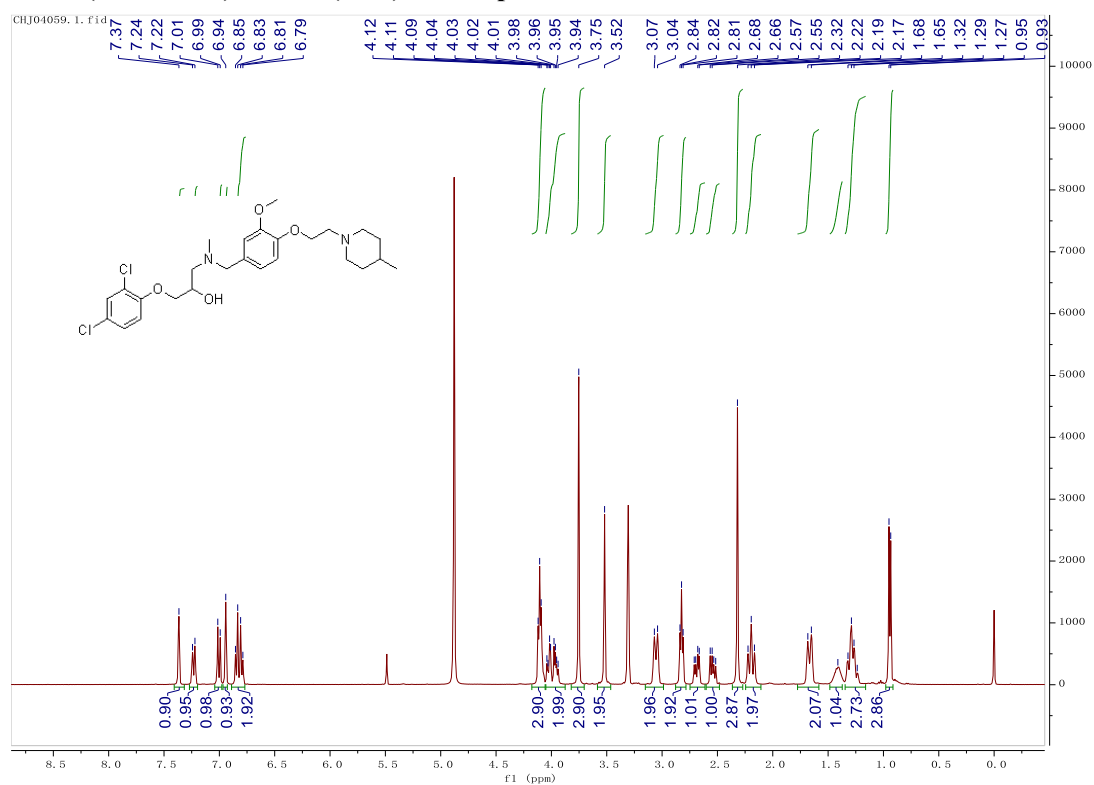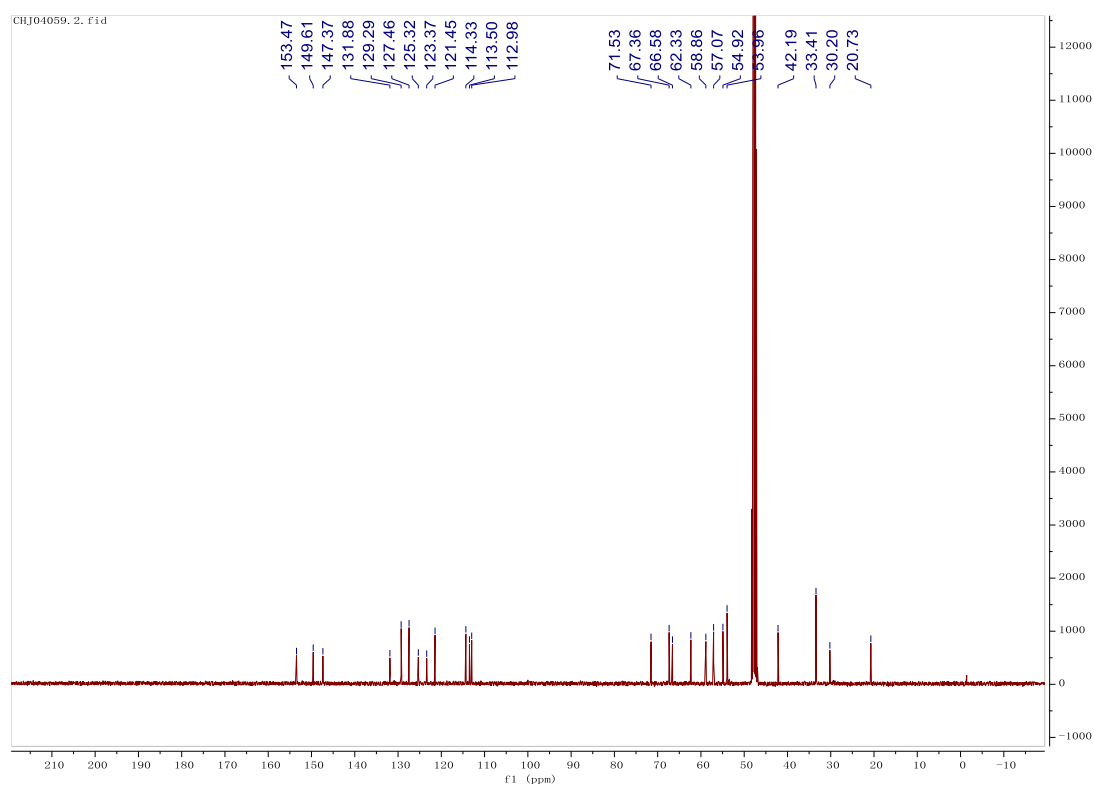

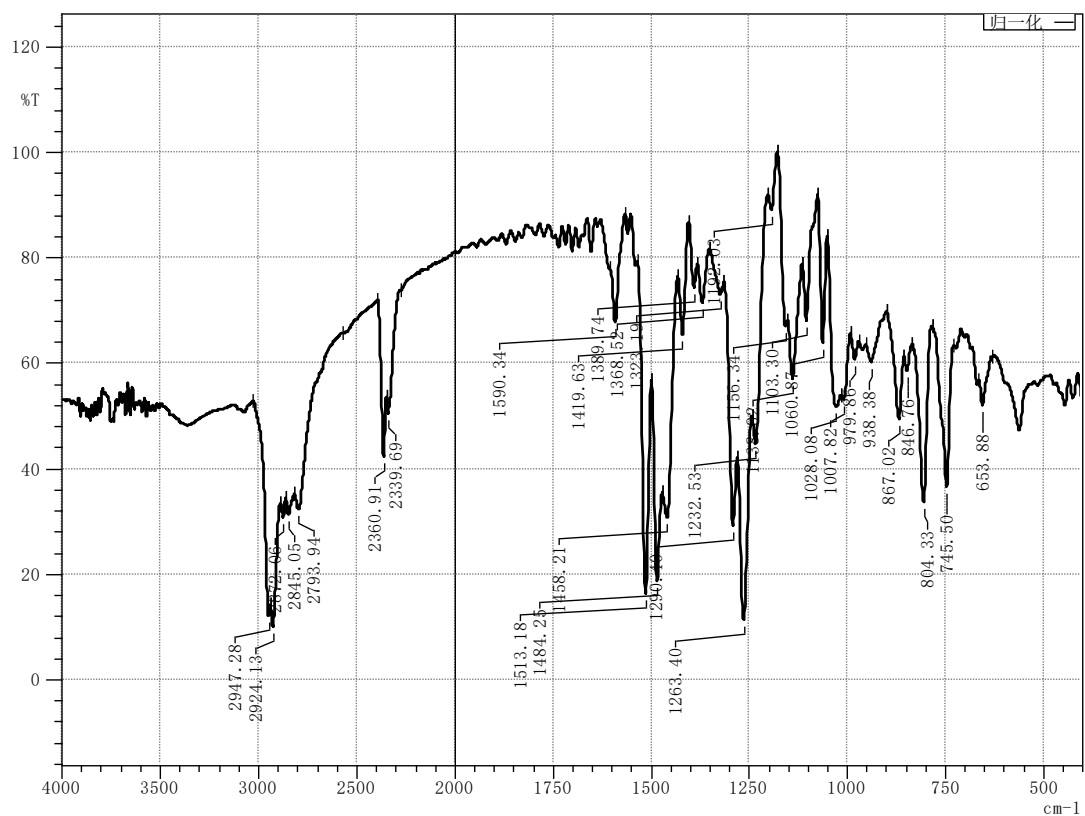

**NMR ( $^1\text{H}$  and  $^{13}\text{C}$ ) and IR (KBr) of Compound CHJ04060:**

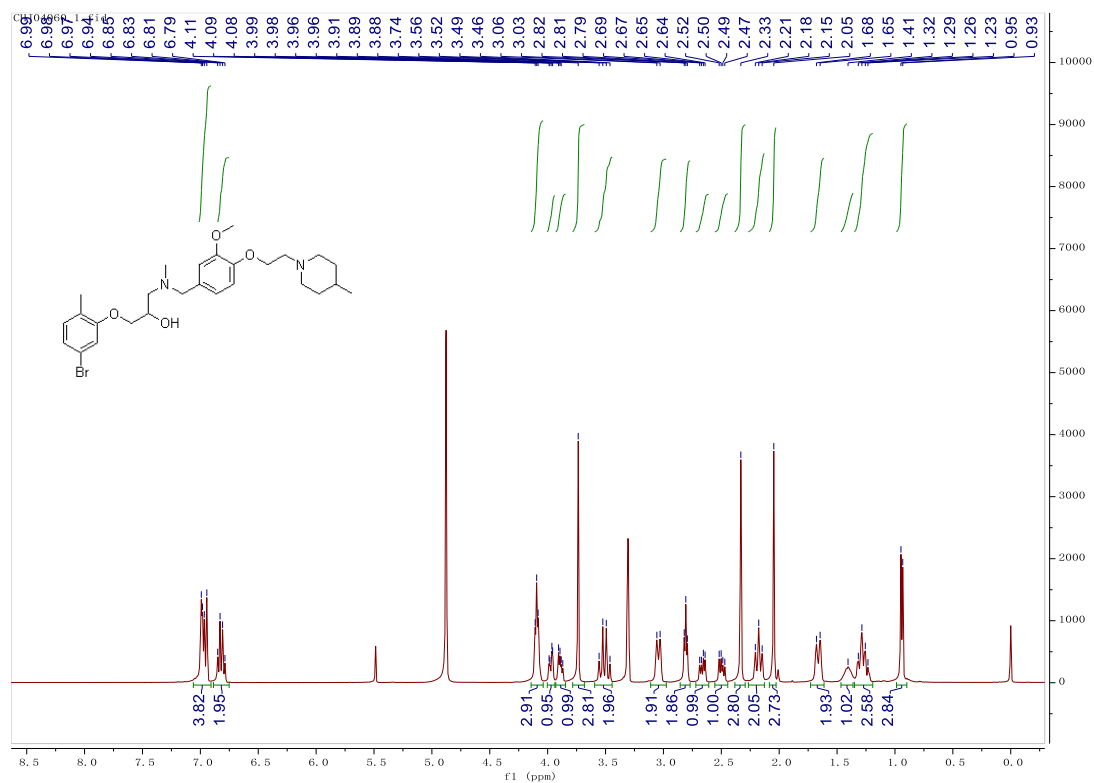

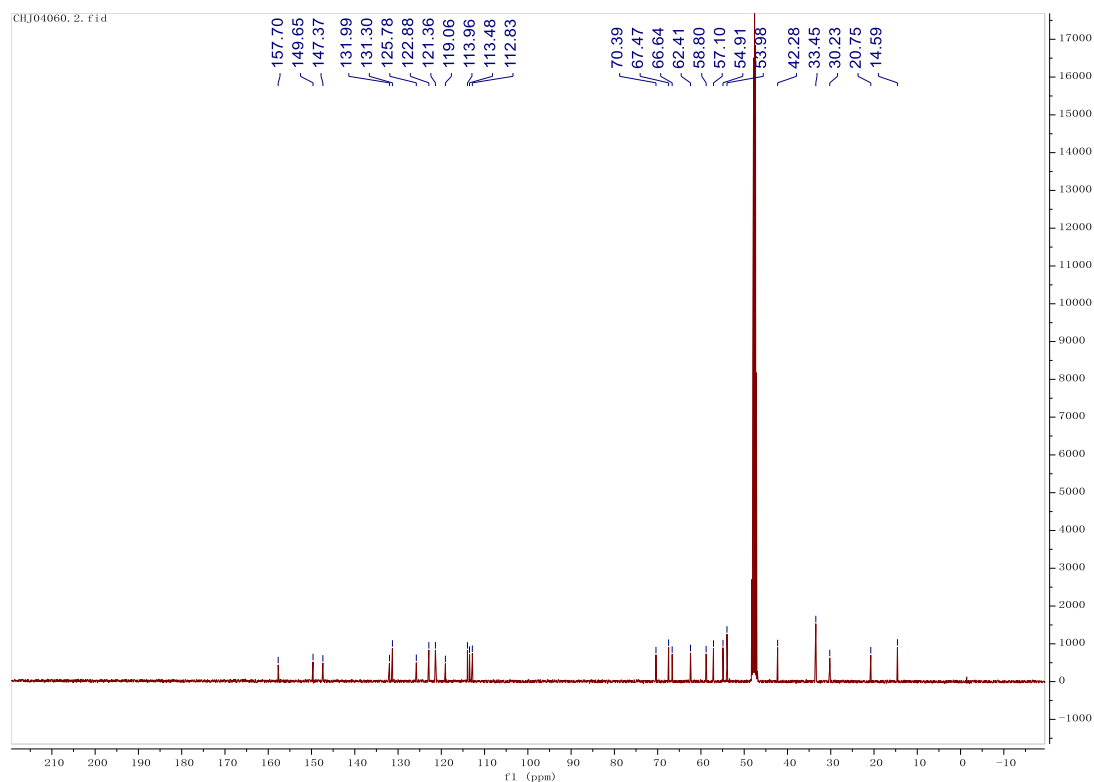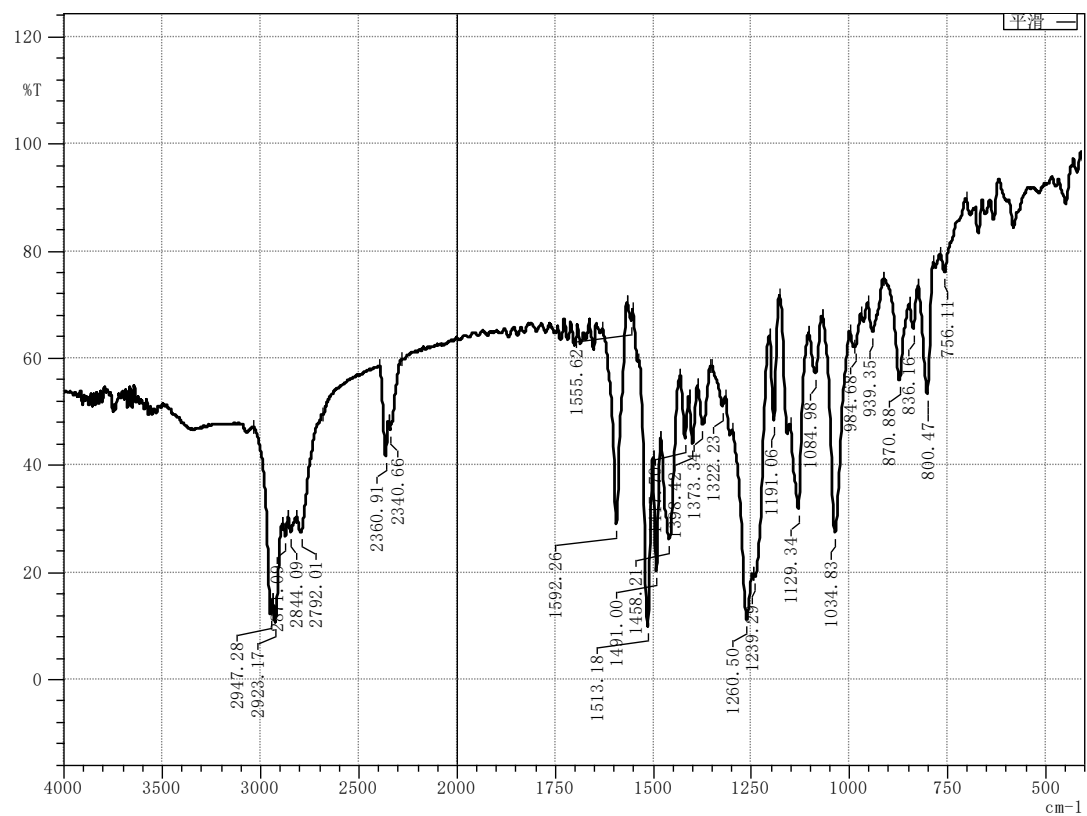

# **NMR (<sup>1</sup>H and <sup>13</sup>C) and IR (KBr) of Compound CHJ04061:**

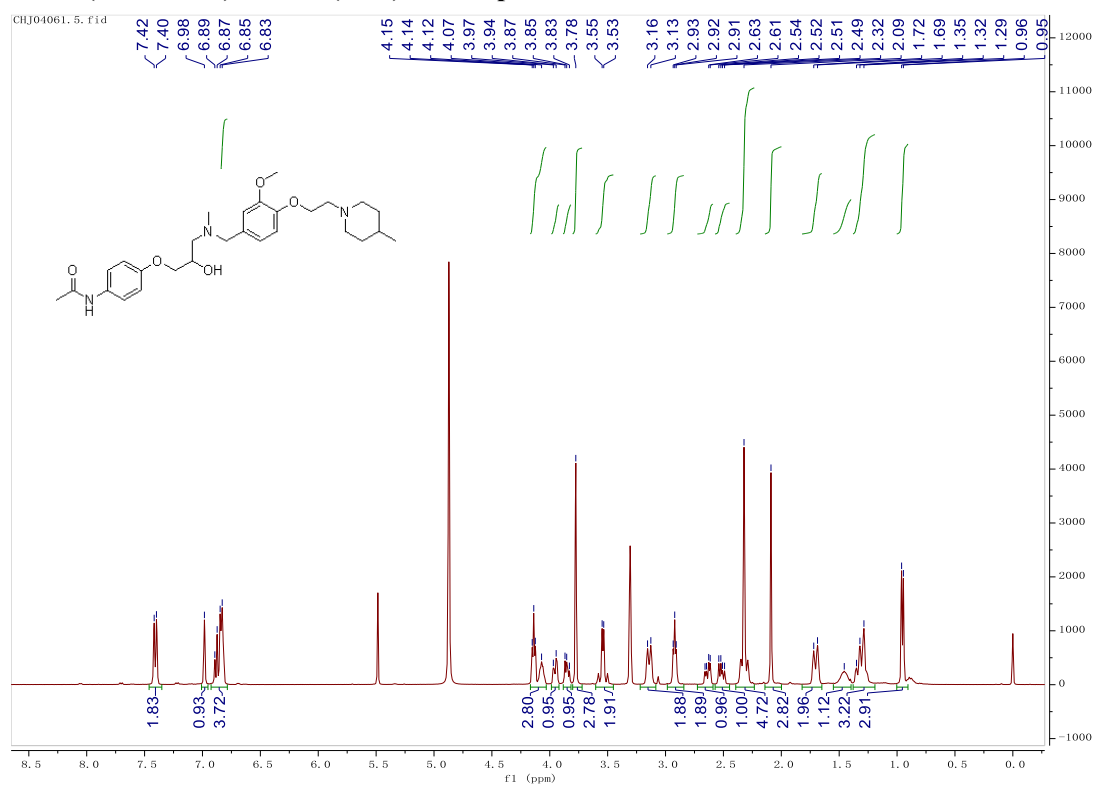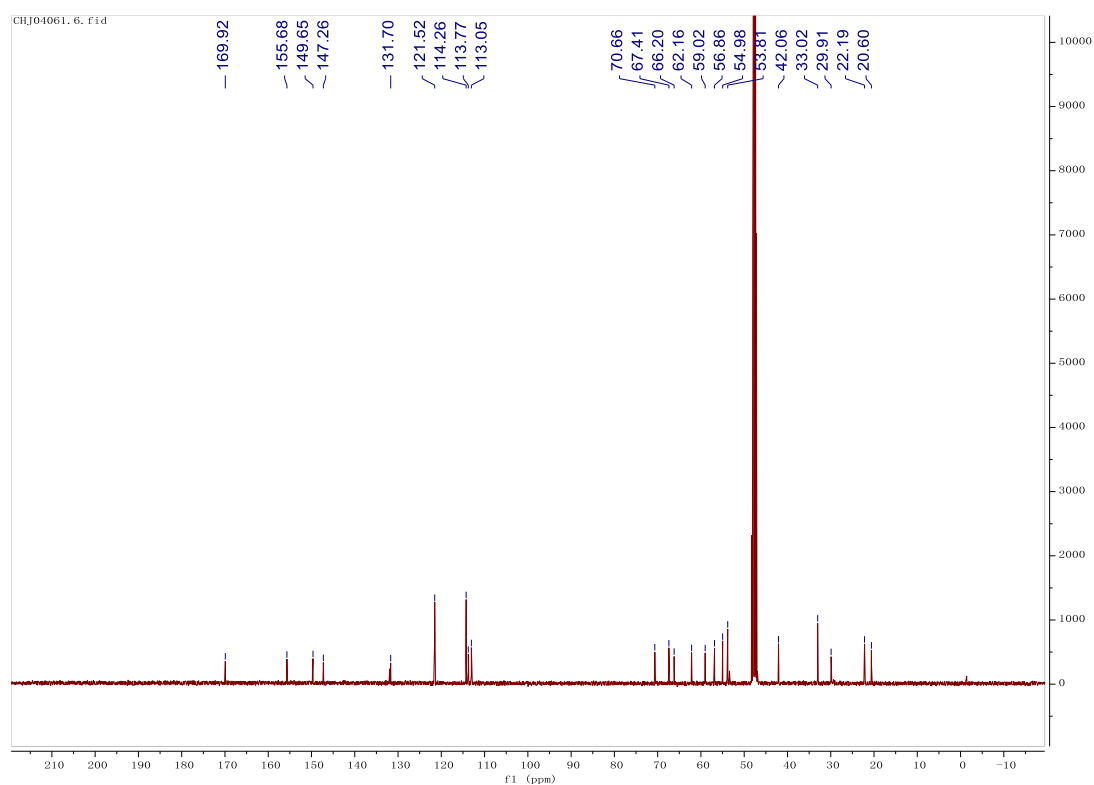



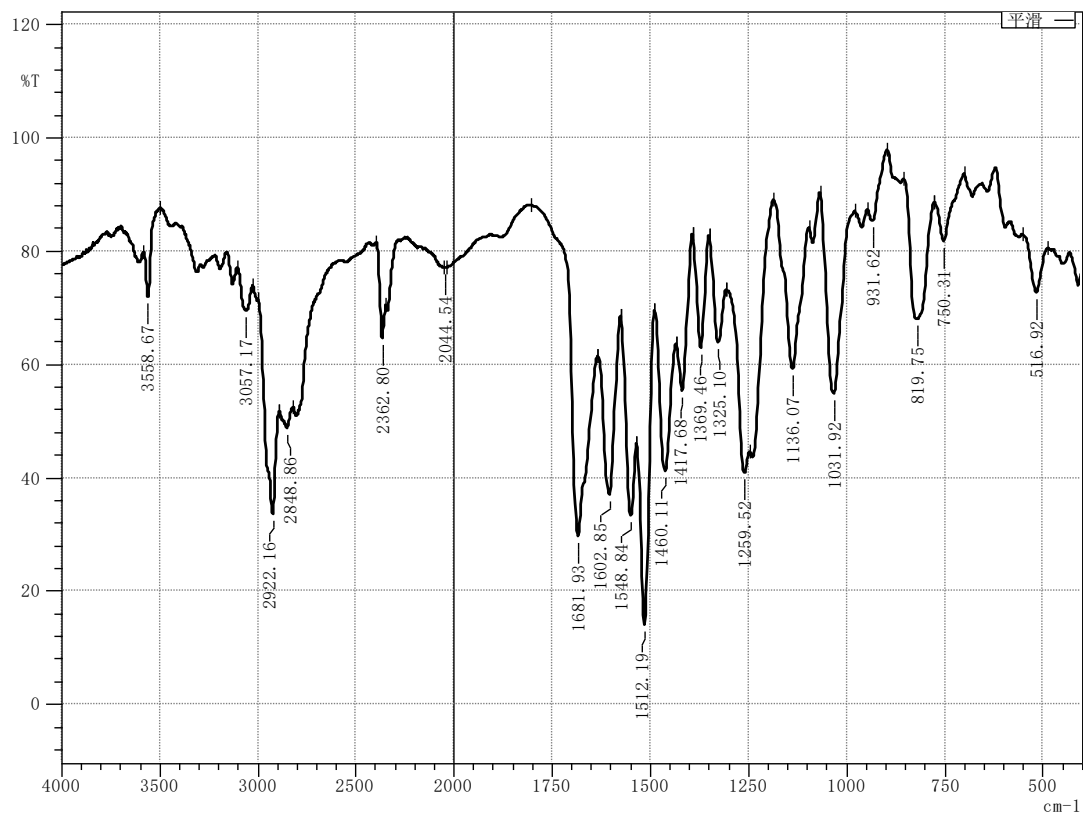

**NMR ( $^1\text{H}$  and  $^{13}\text{C}$ ) and IR (KBr) of Compound CHJ04082:**

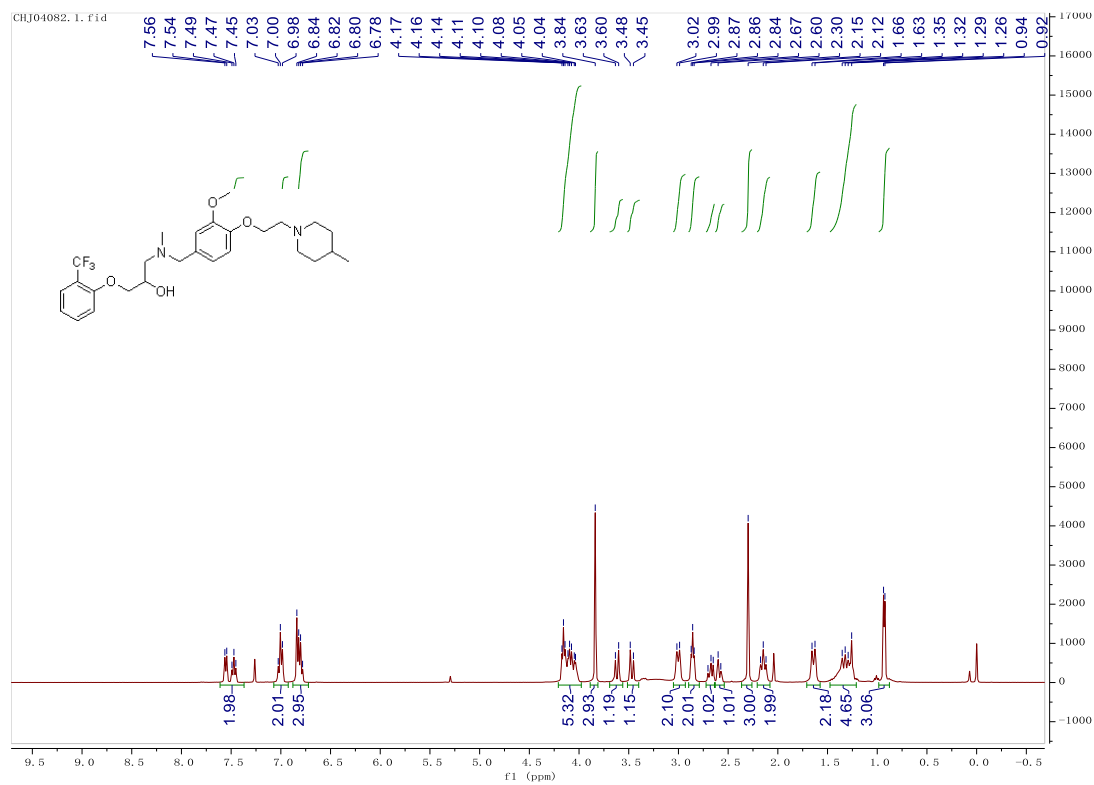

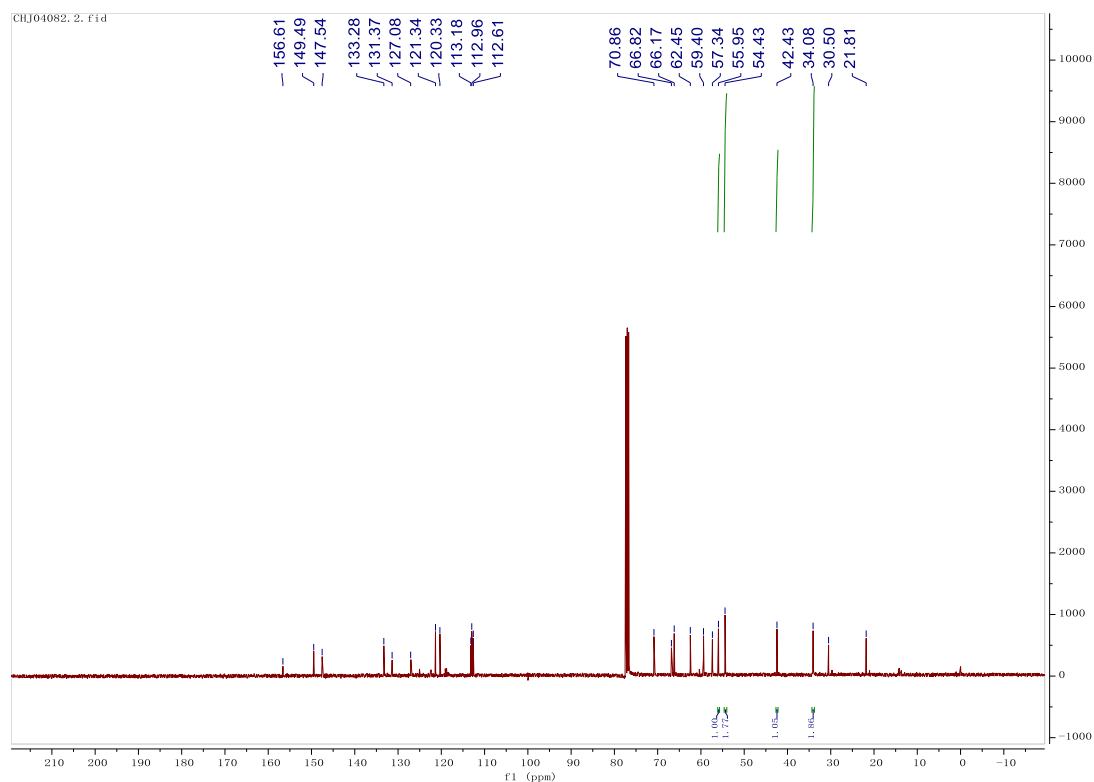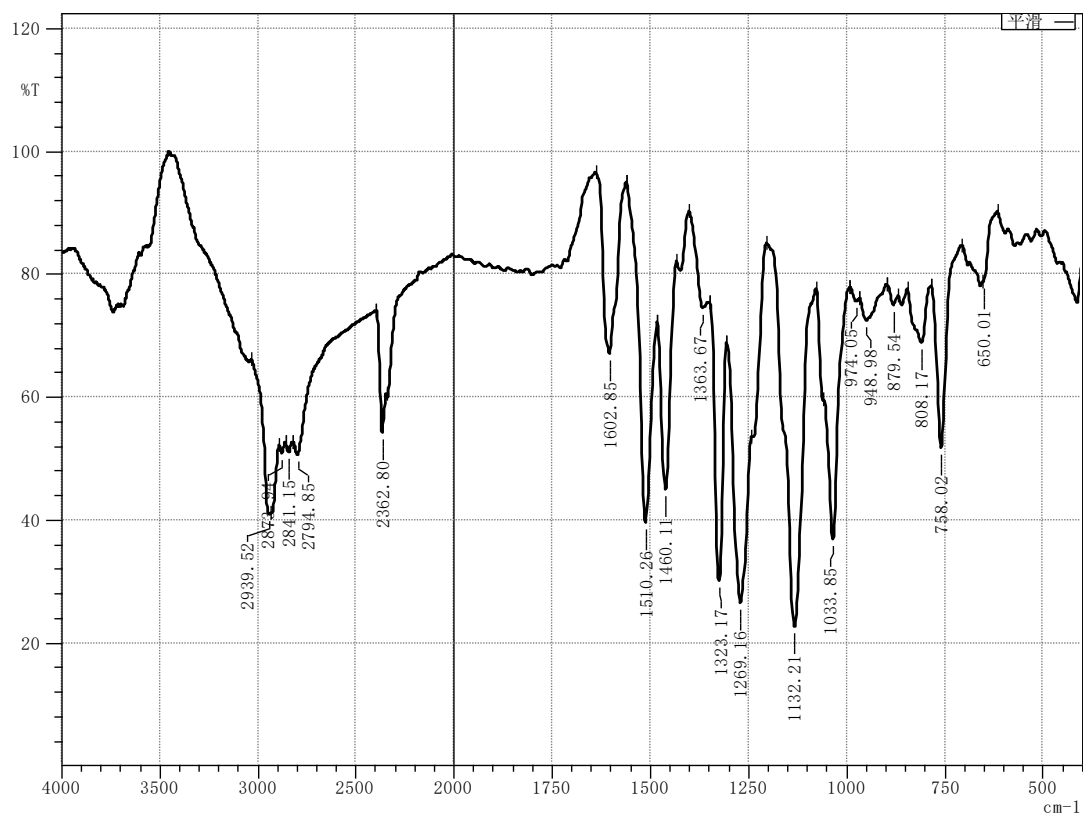

# **NMR (<sup>1</sup>H and <sup>13</sup>C) and IR (KBr) of Compound CHJ04083:**

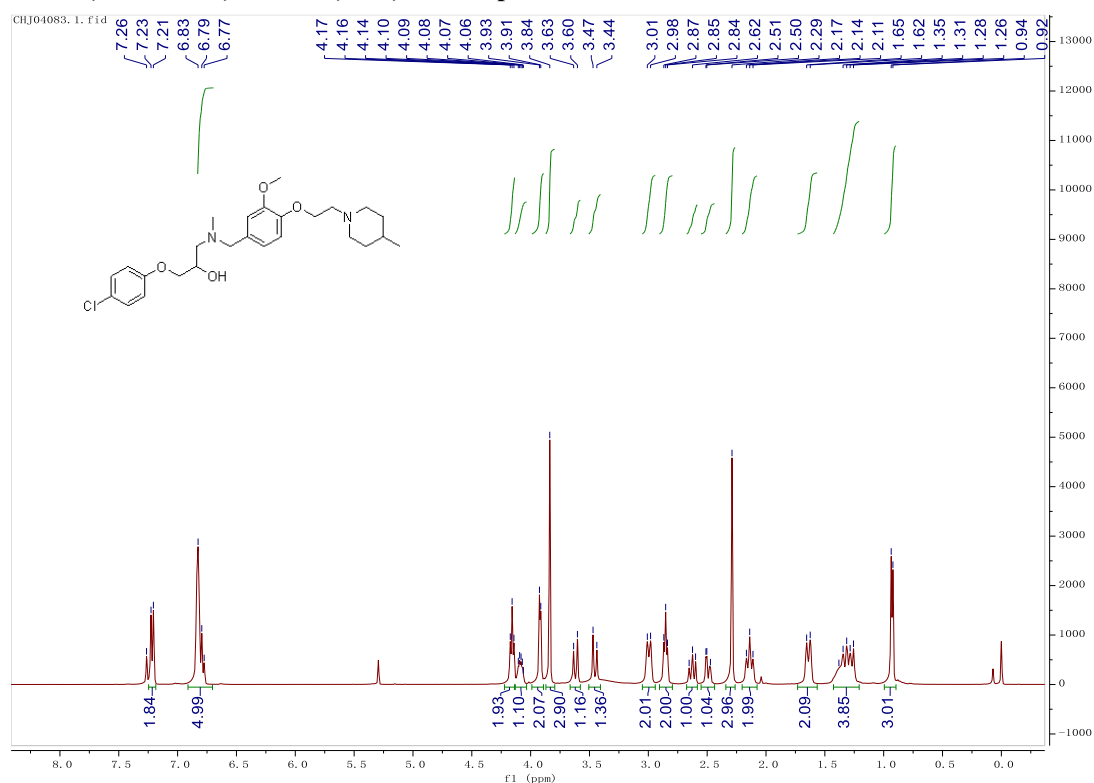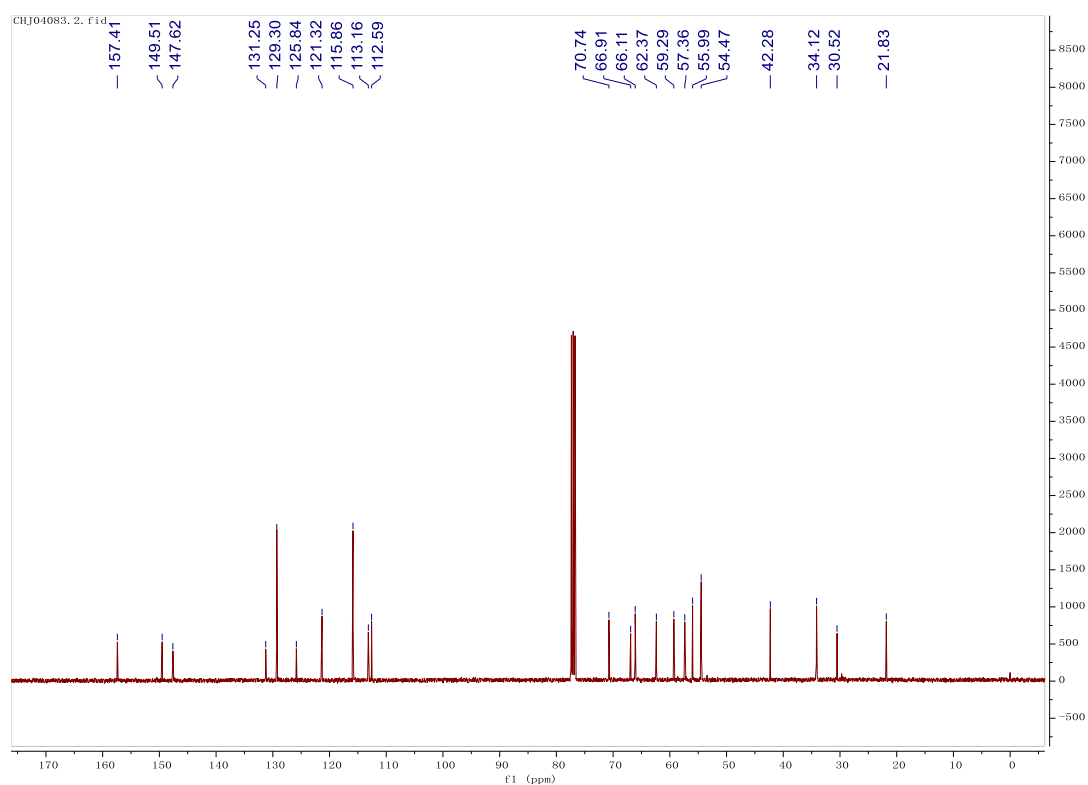

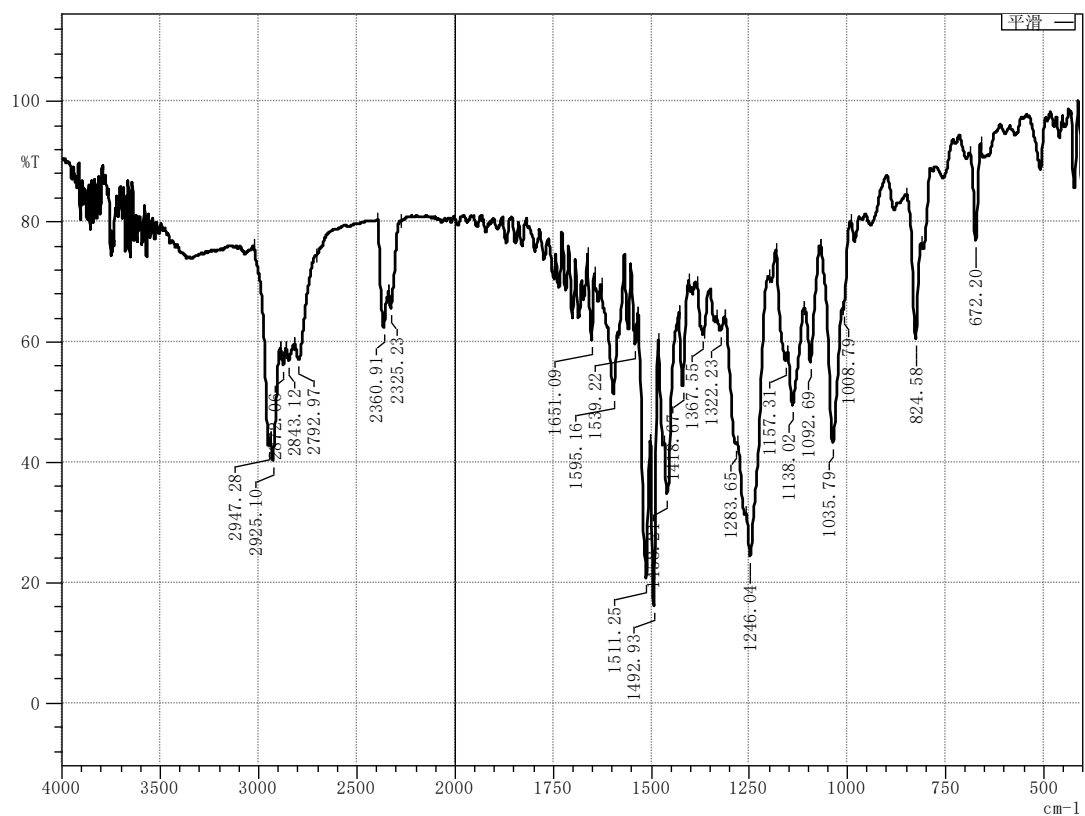

**NMR (<sup>1</sup>H and <sup>13</sup>C) and IR (KBr) of Compound CHJ04084:**

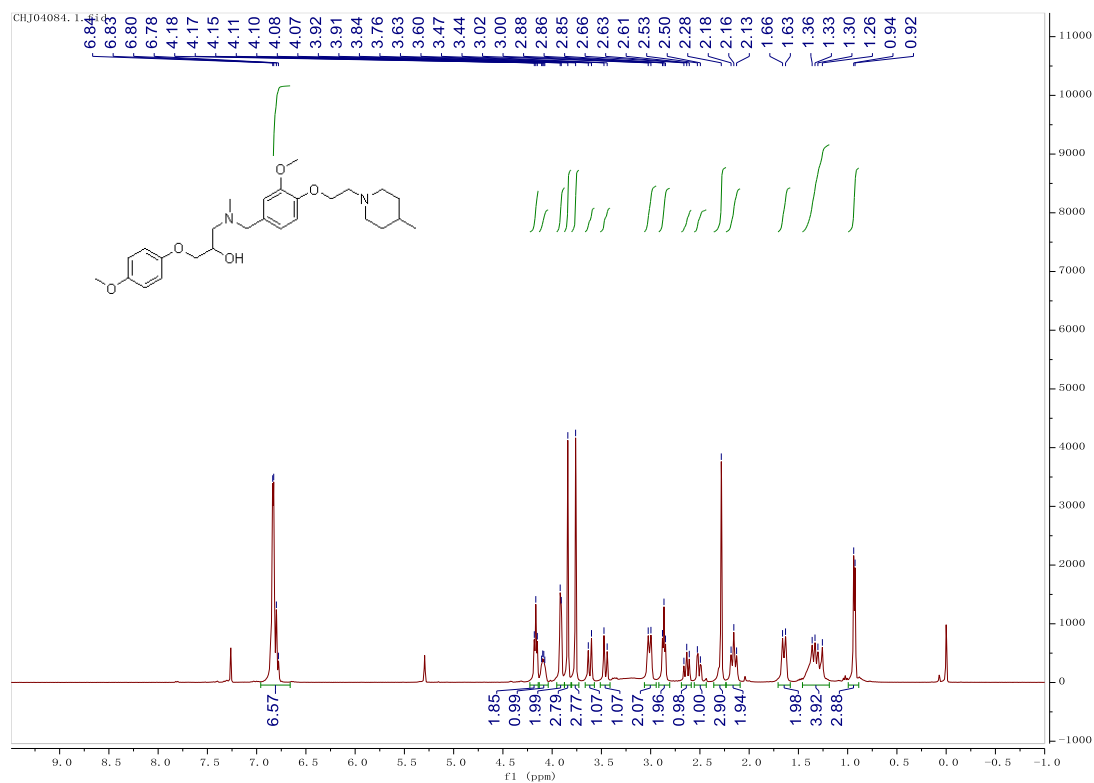

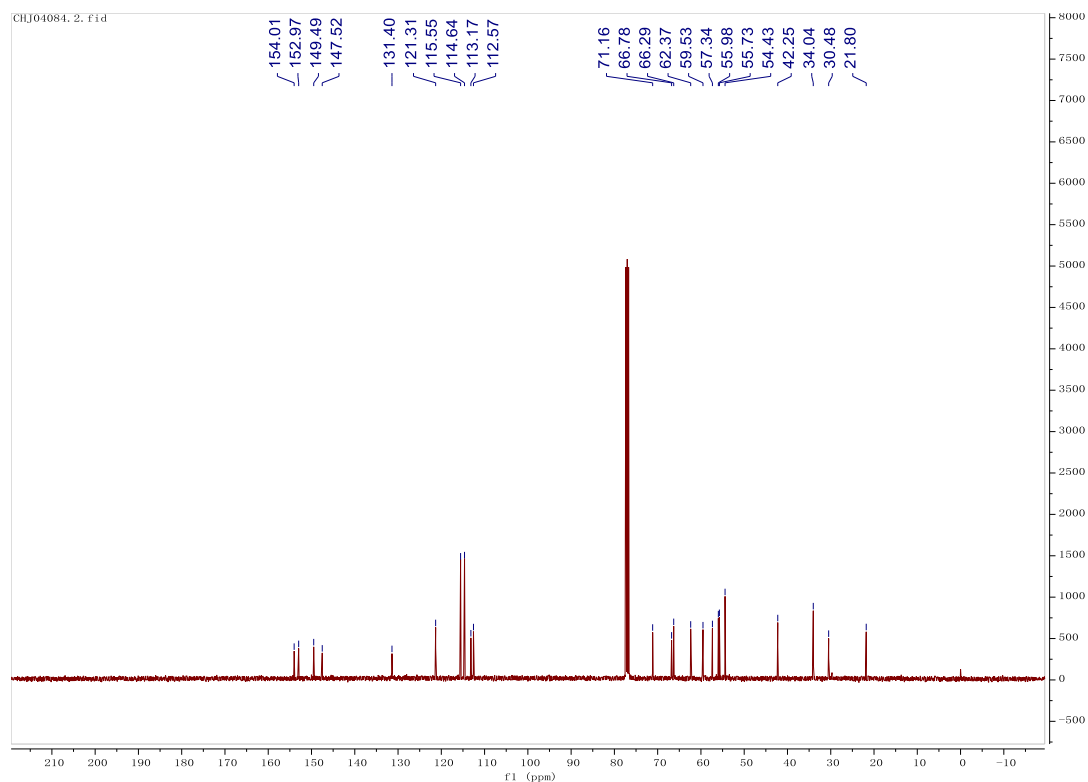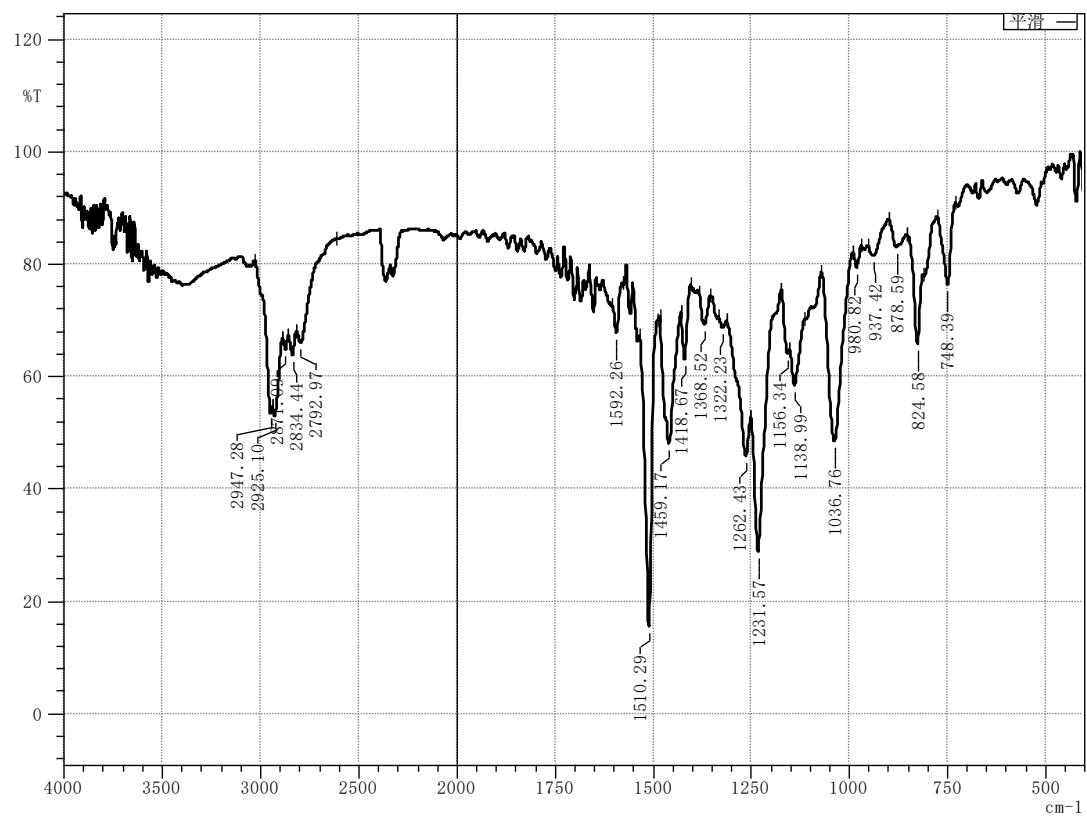

# **NMR (<sup>1</sup>H and <sup>13</sup>C) and IR (KBr) of Compound CHJ04085:**

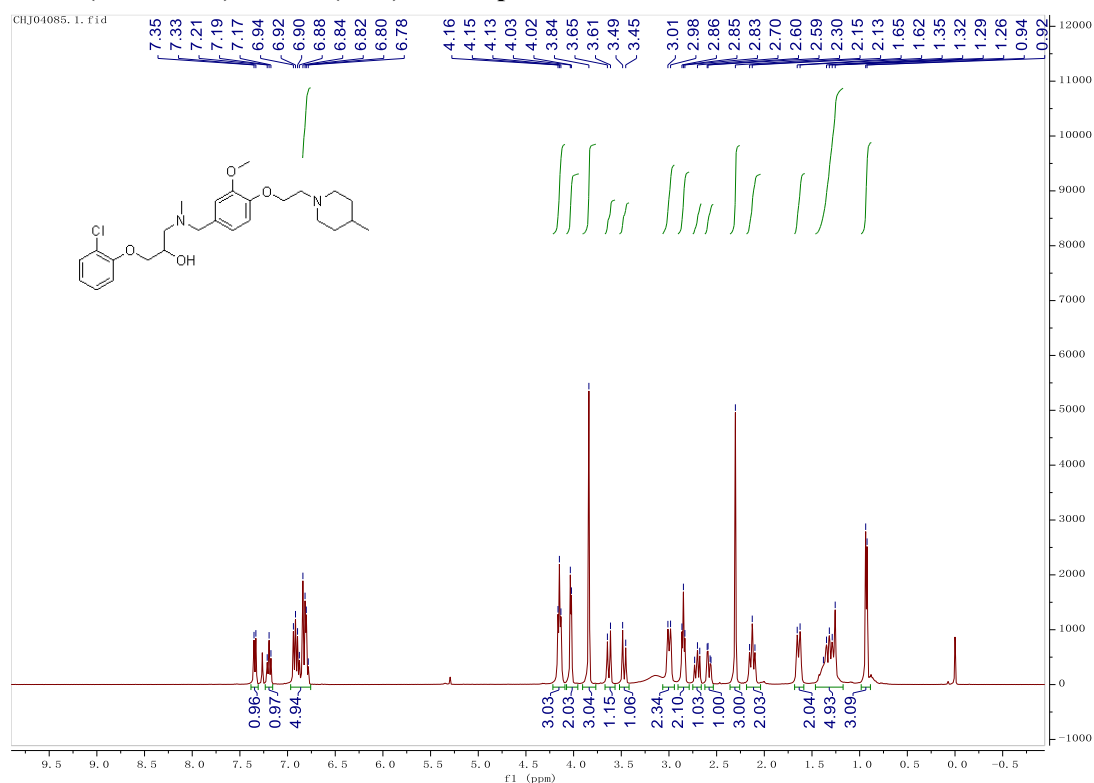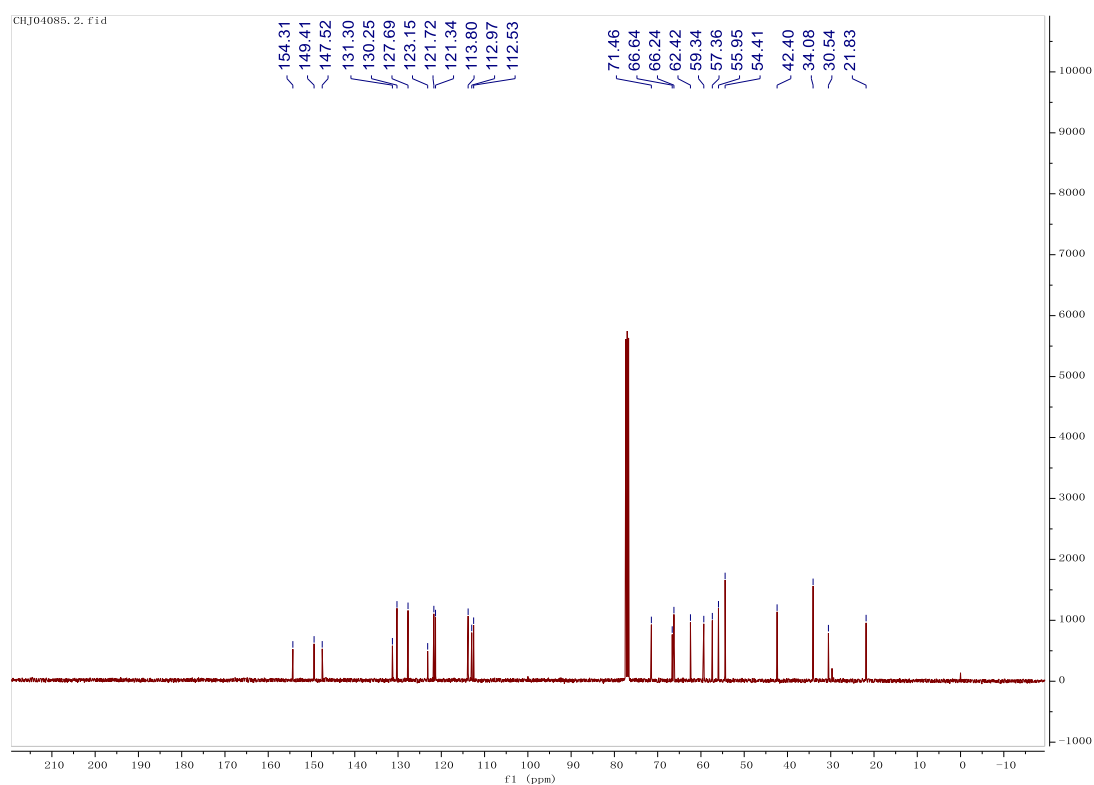

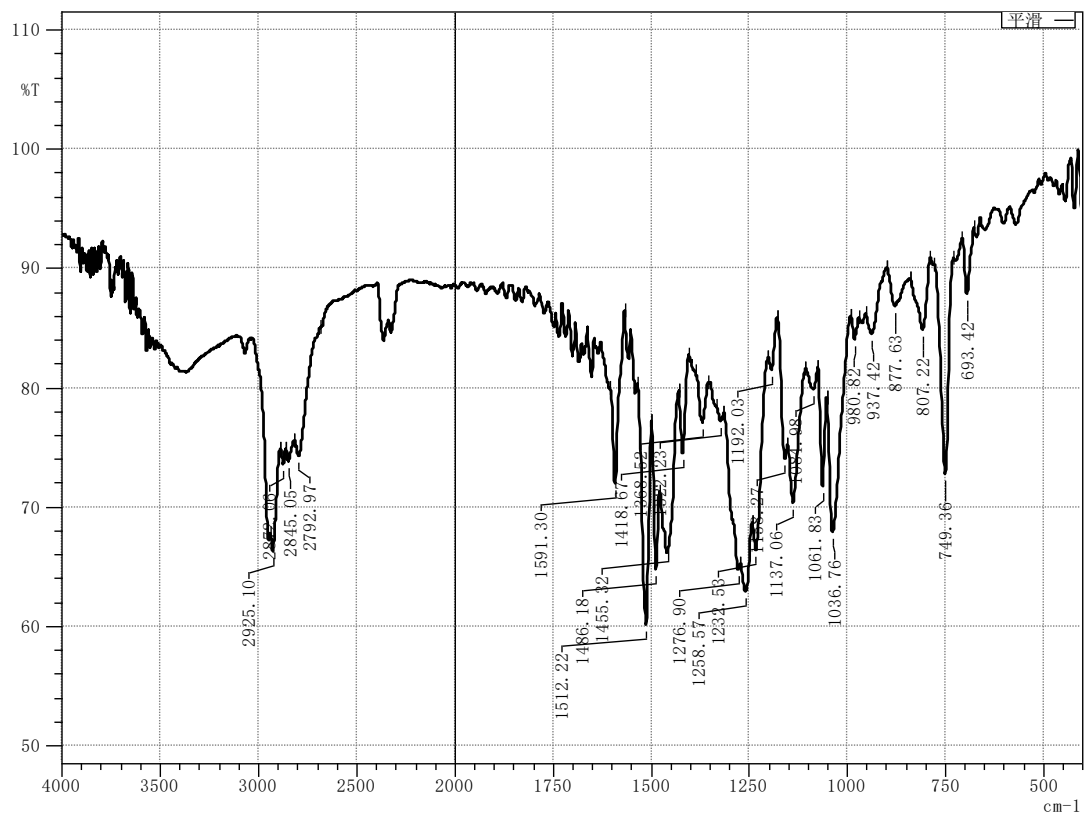

**NMR (<sup>1</sup>H and <sup>13</sup>C) and IR (KBr) of Compound CHJ04086:**

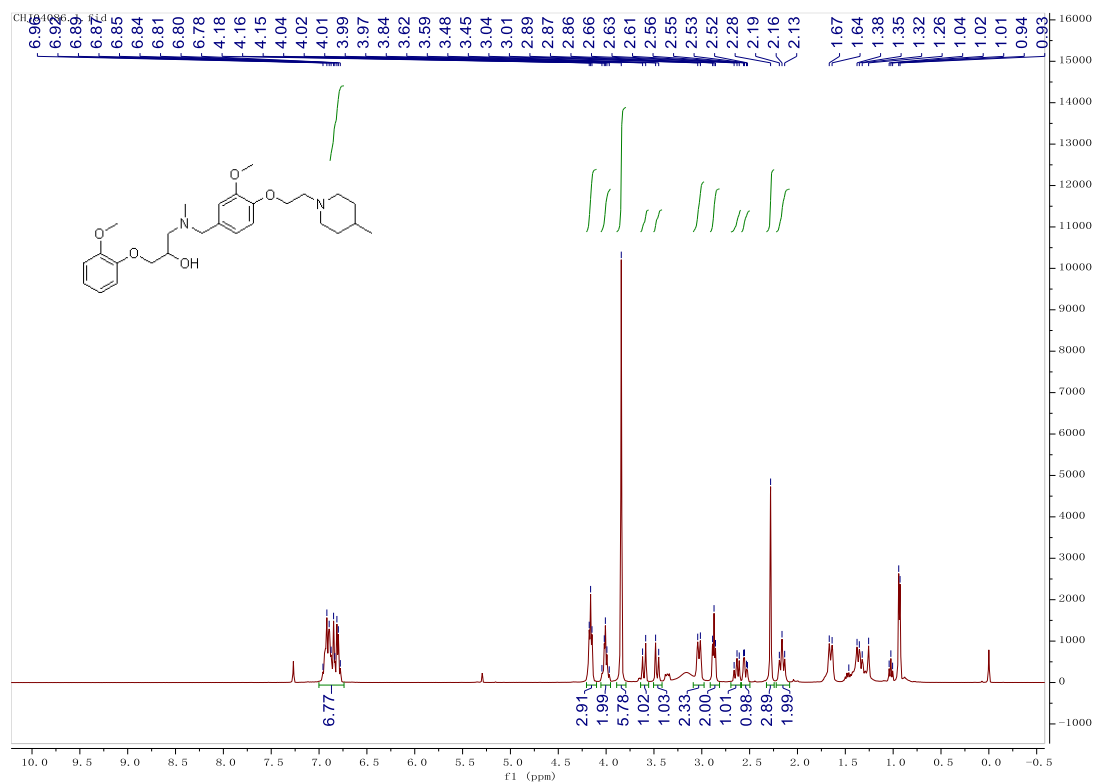

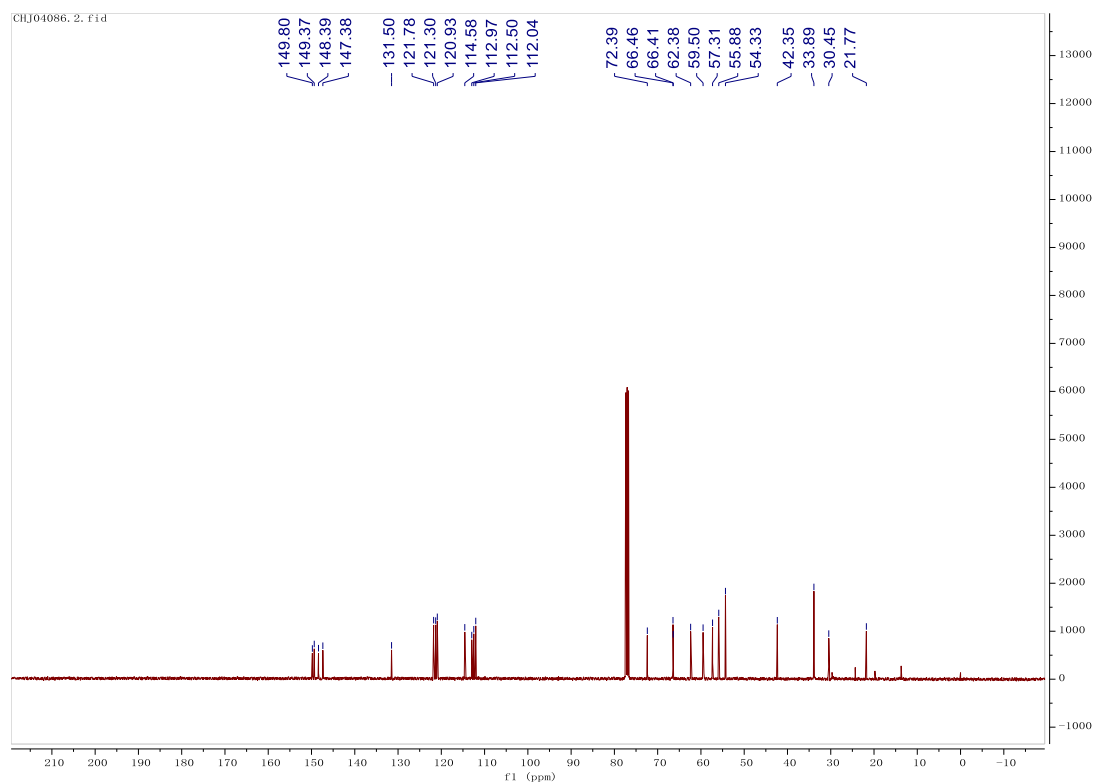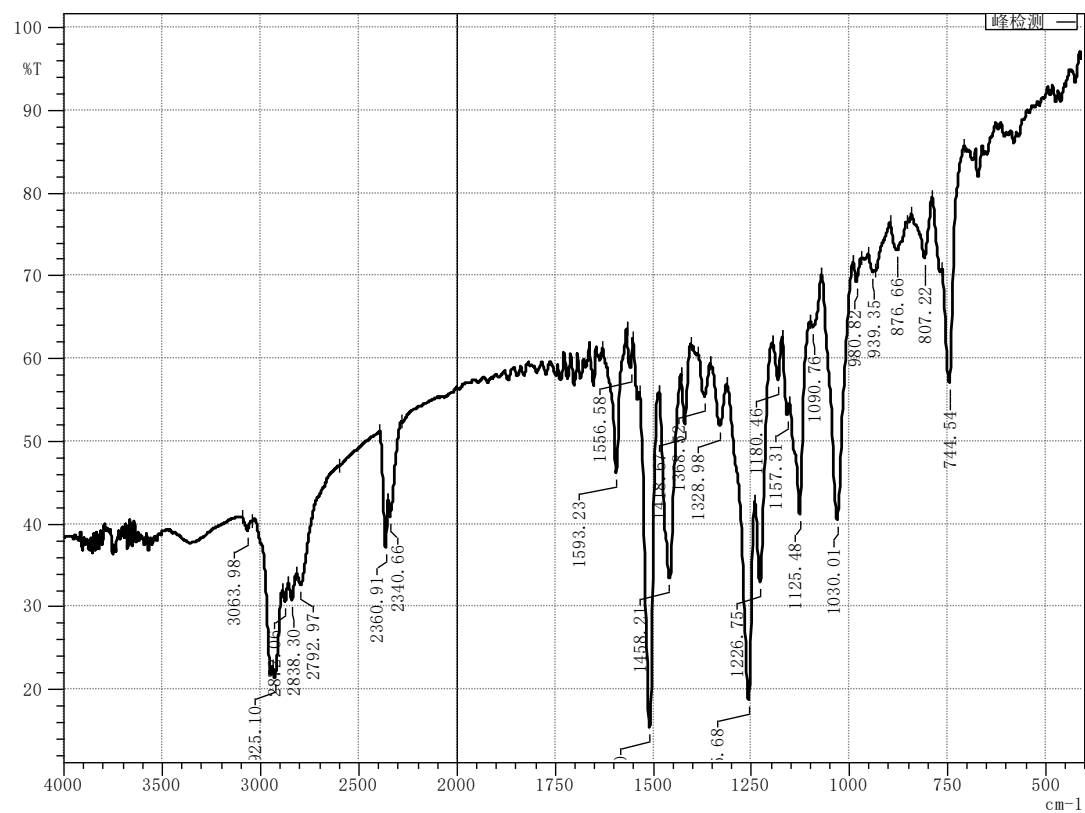



# **NMR (<sup>1</sup>H and <sup>13</sup>C) and IR (KBr) of Compound CHJ04064:**

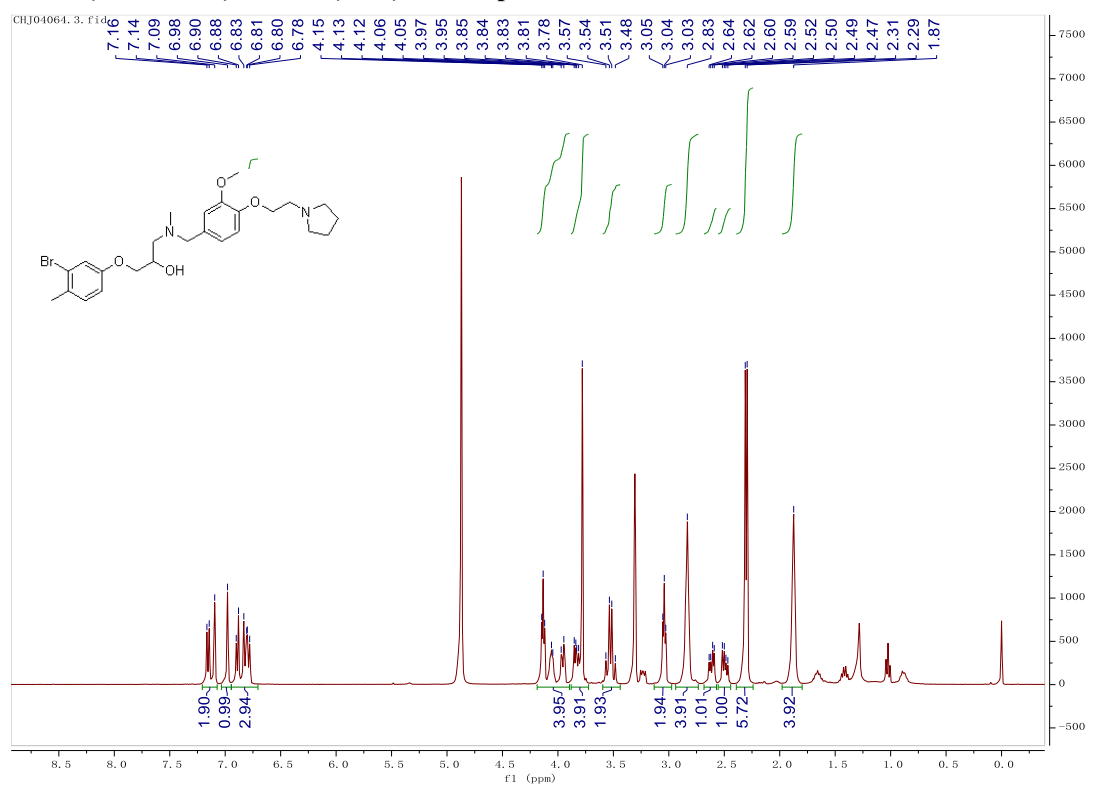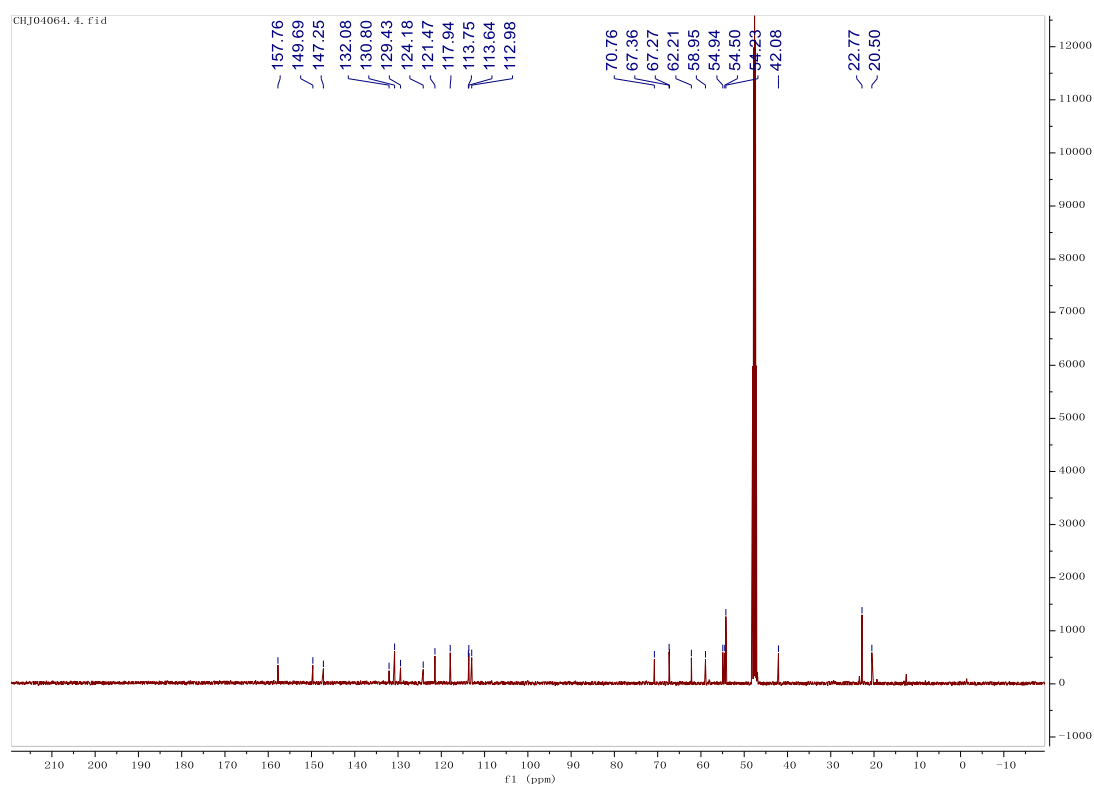

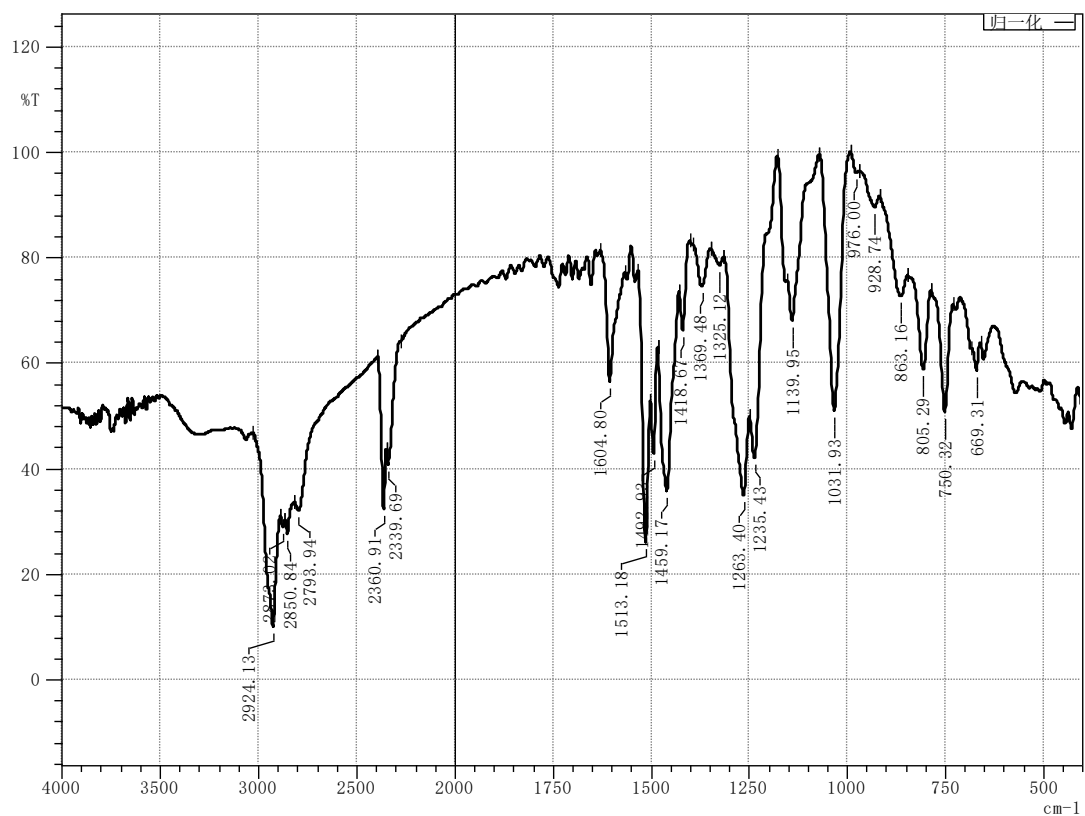

### NMR (<sup>1</sup>H and <sup>13</sup>C) and IR (KBr) of Compound CHJ04065:

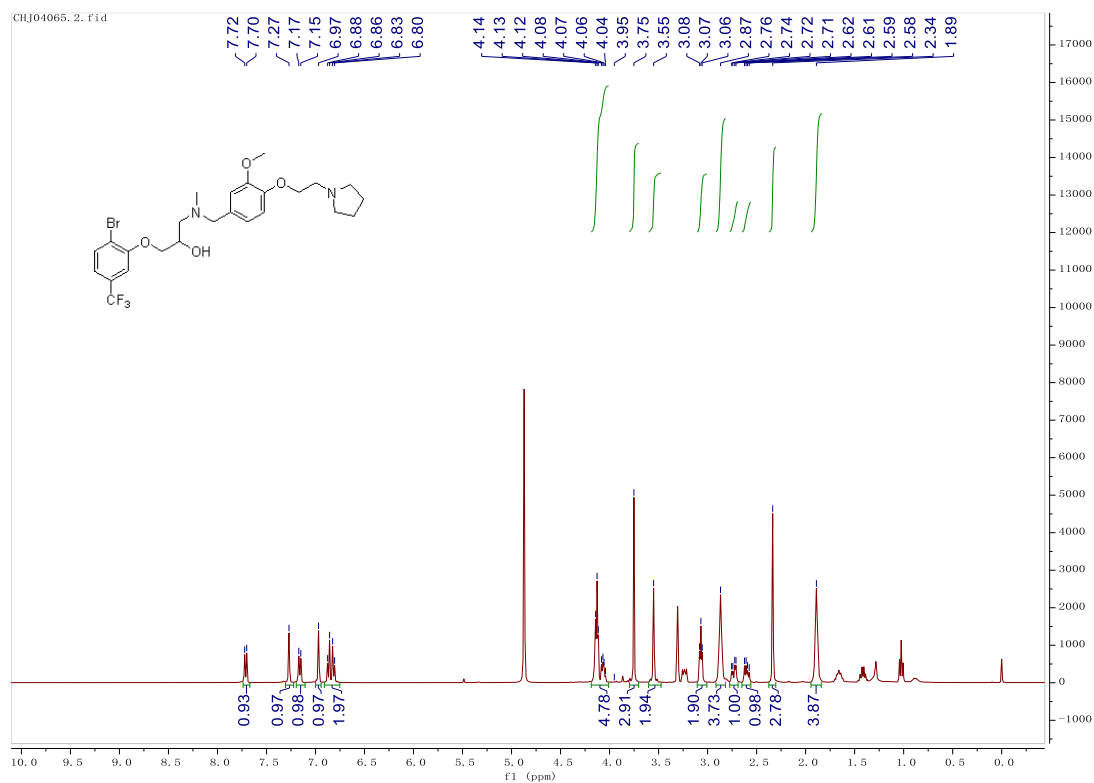

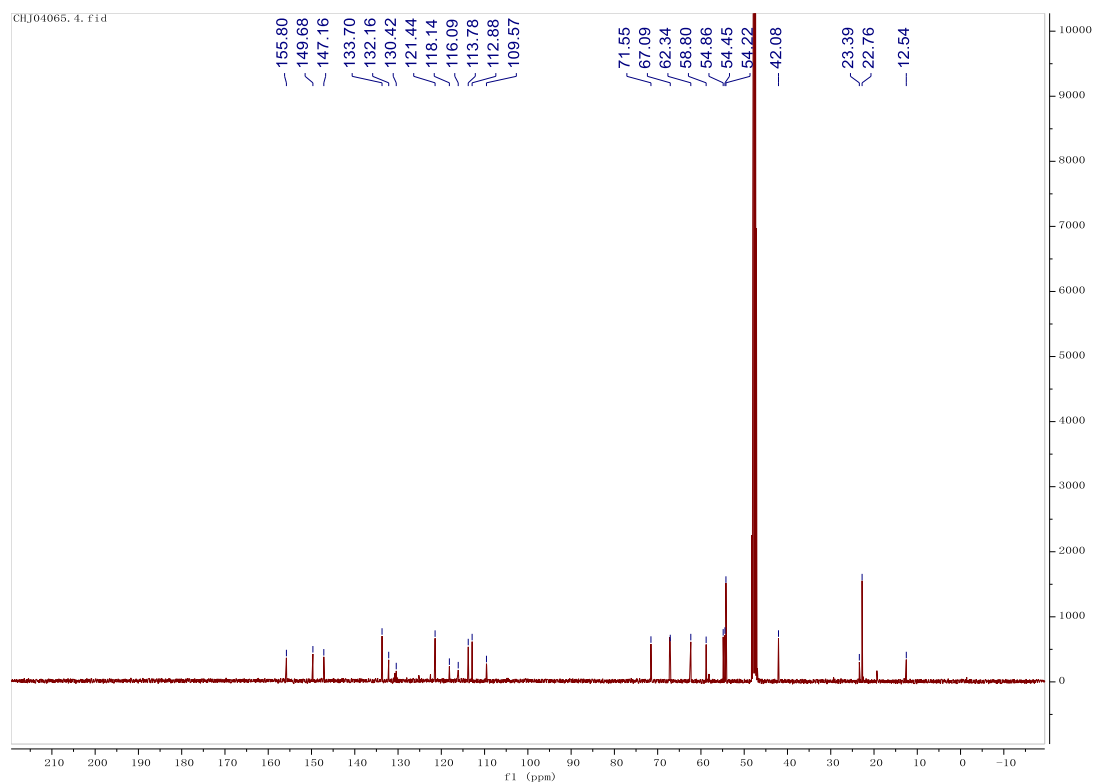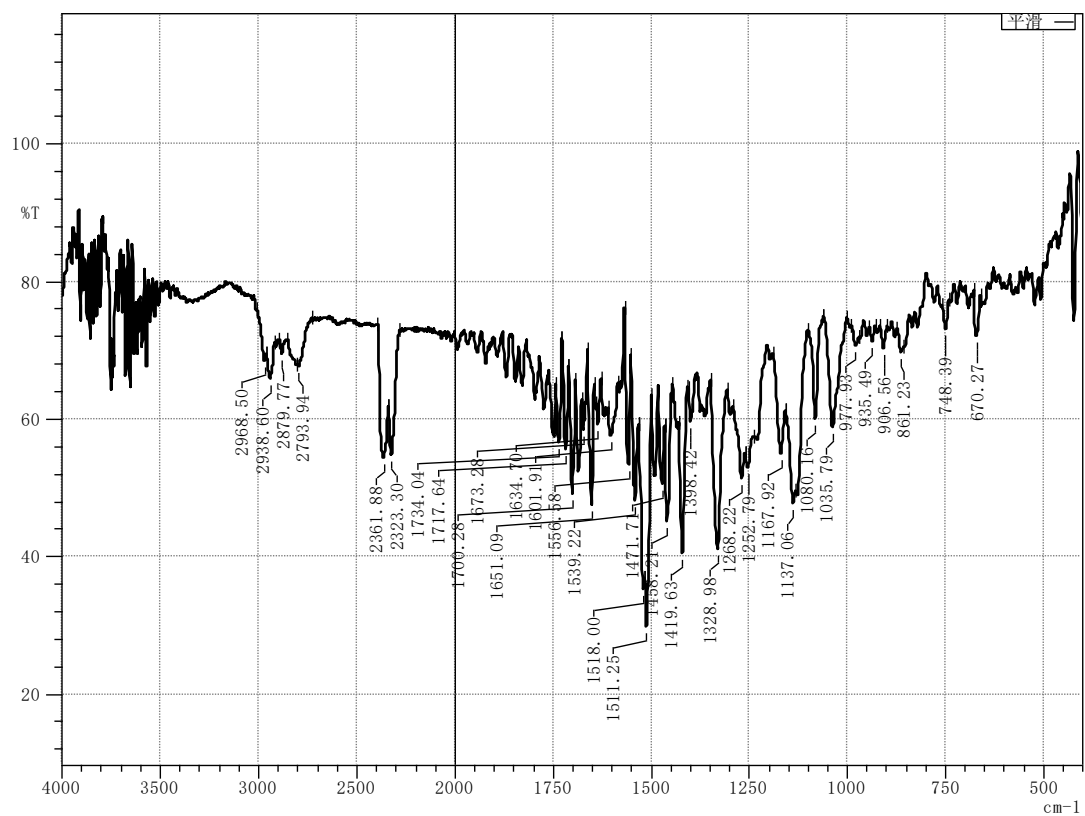

# **NMR (<sup>1</sup>H and <sup>13</sup>C) and IR (KBr) of Compound CHJ04066:**

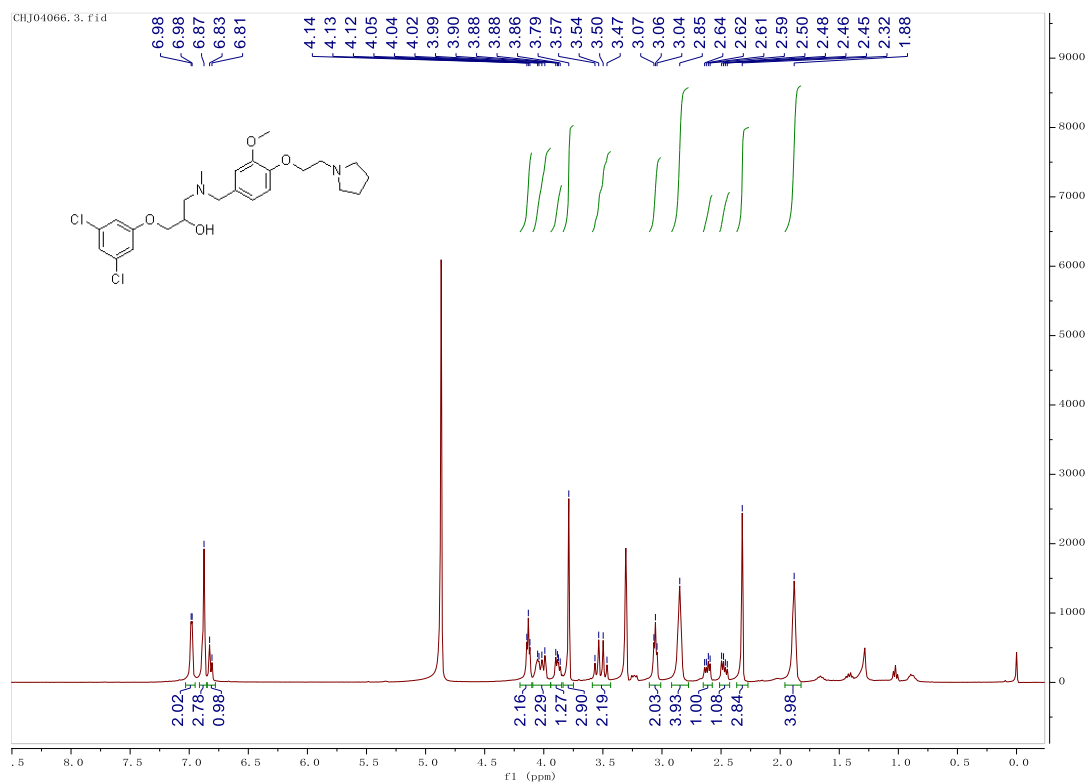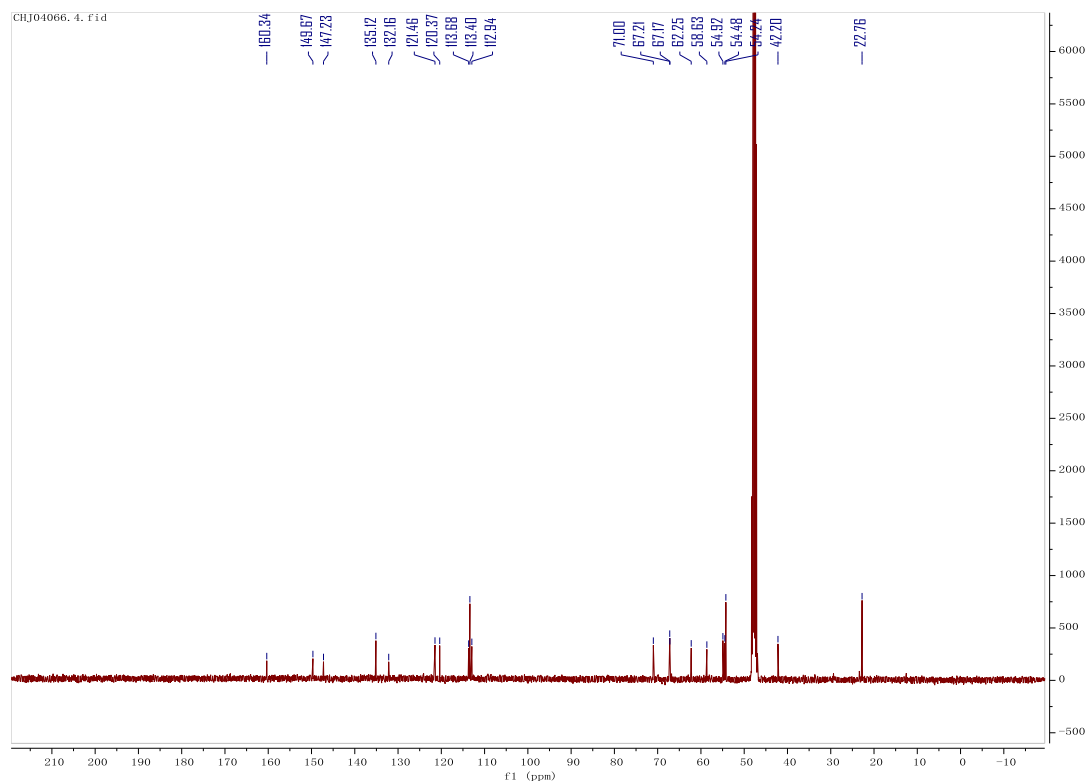

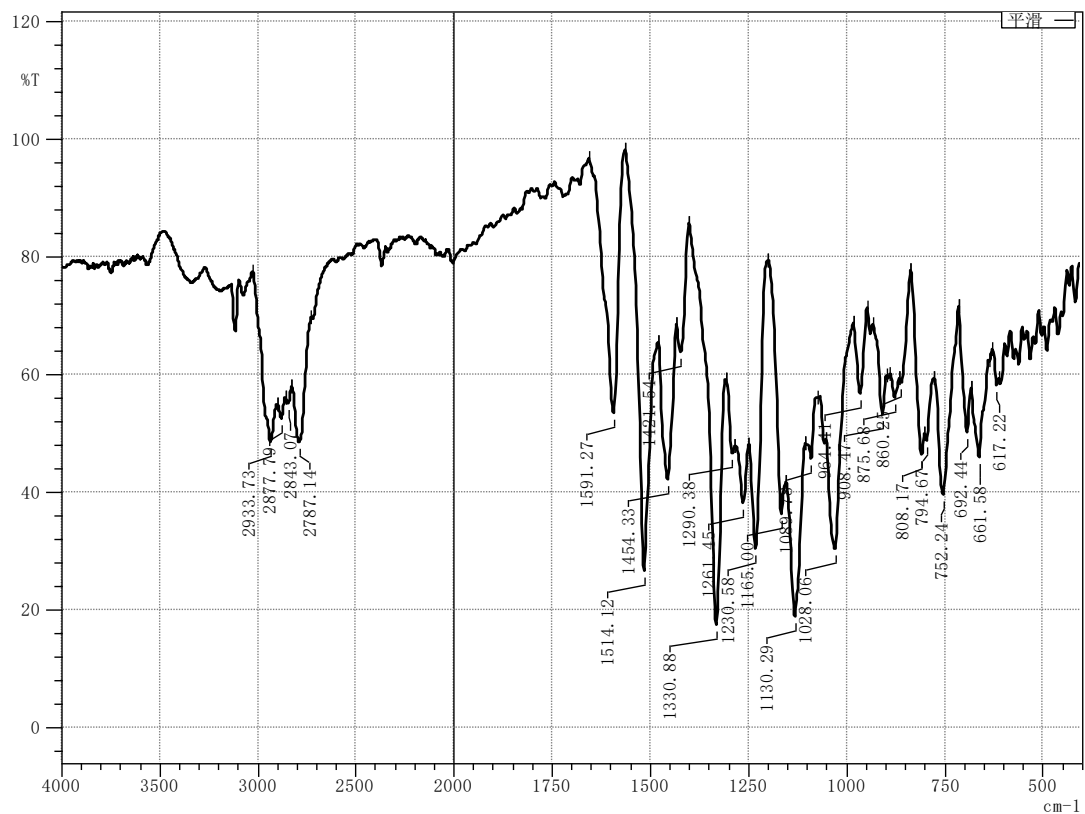

**NMR (<sup>1</sup>H and <sup>13</sup>C) and IR (KBr) of Compound CHJ04068:**

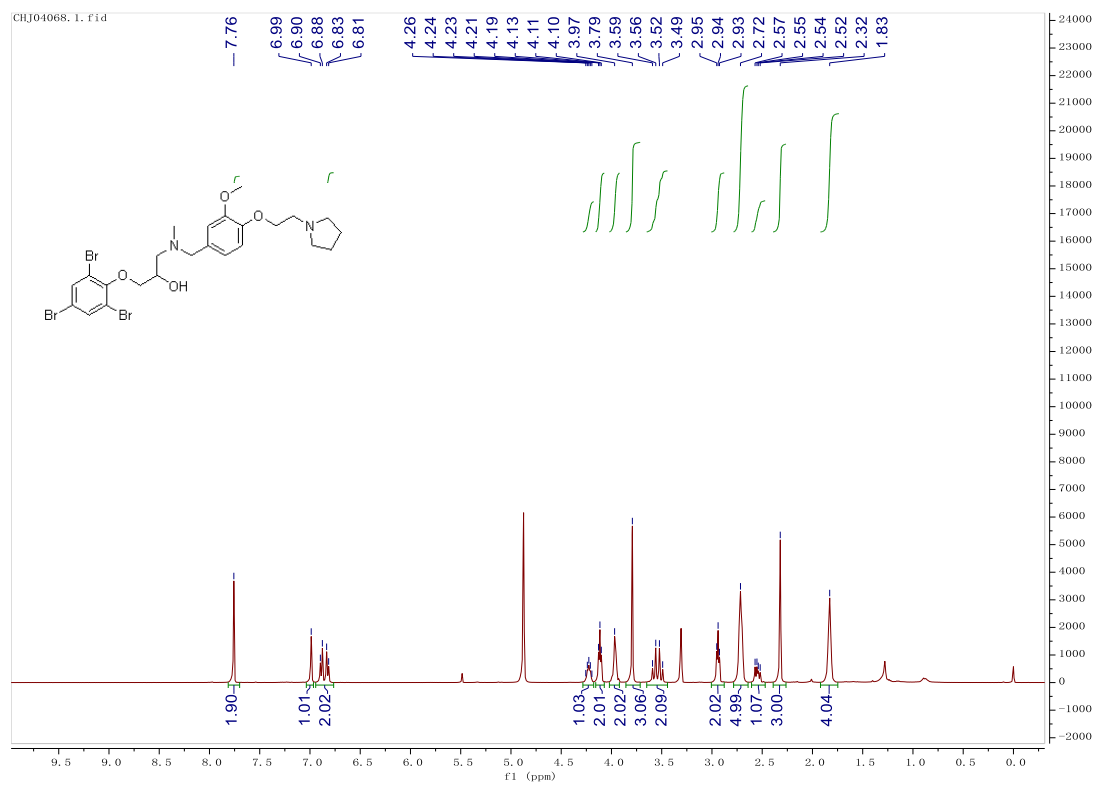

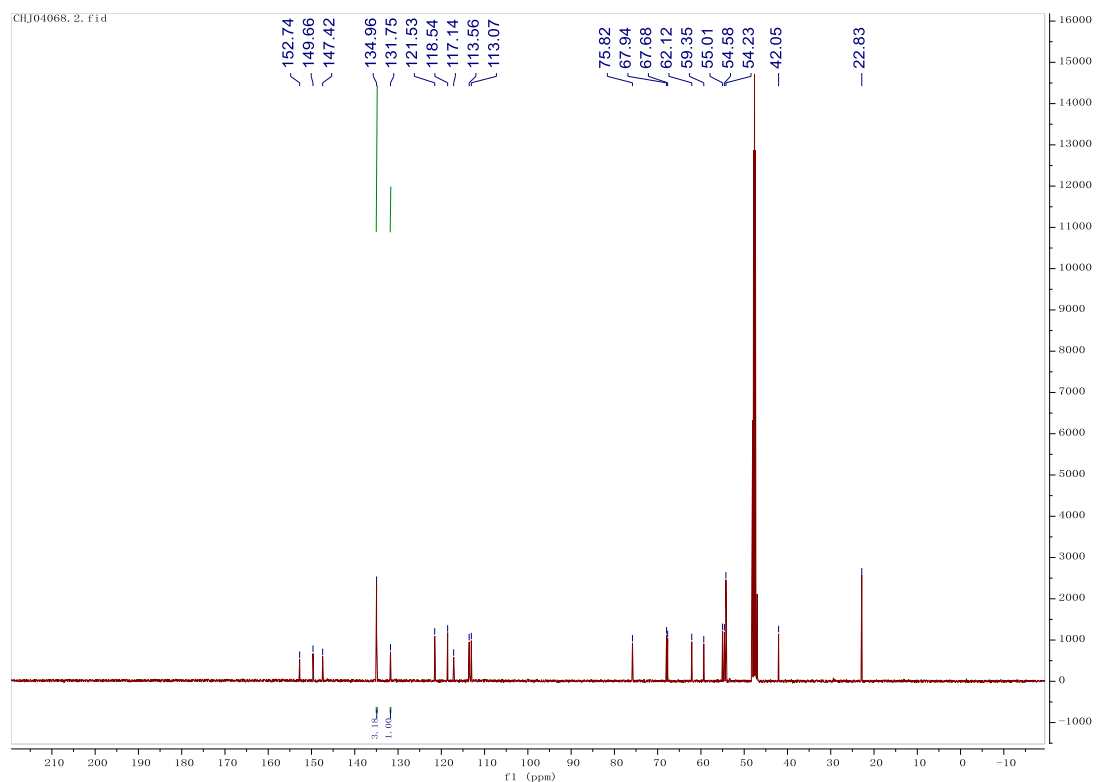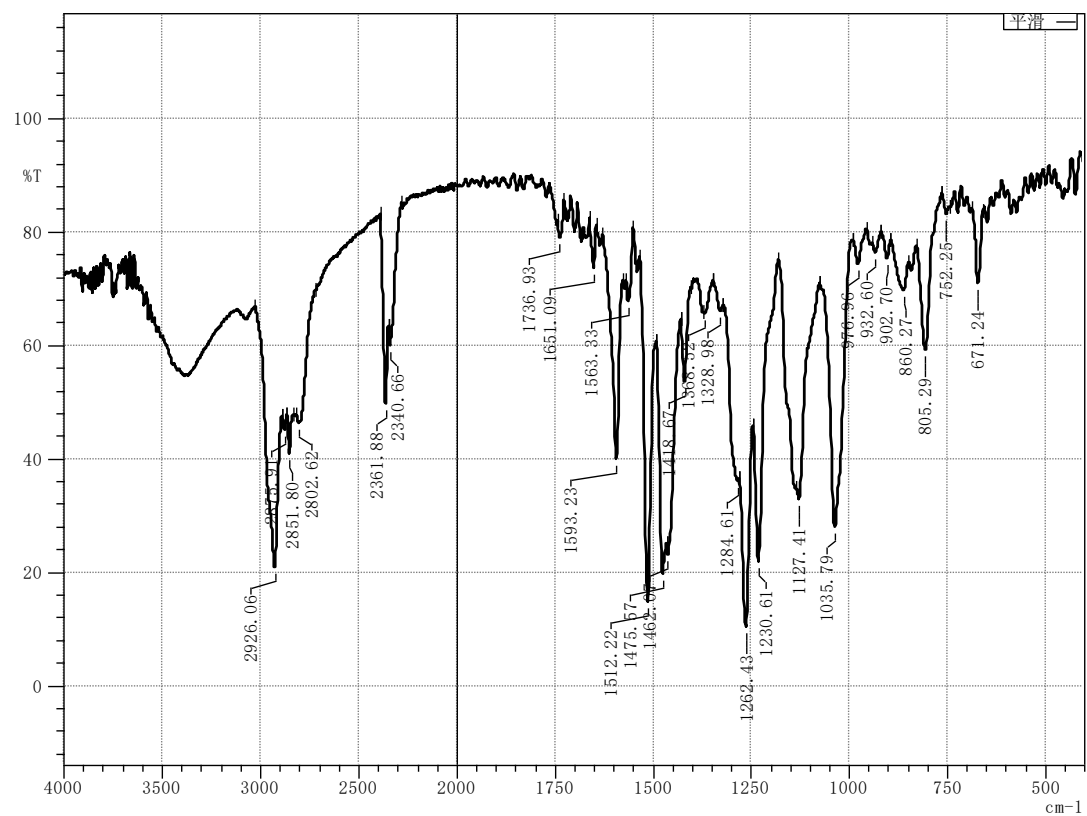

# **NMR (<sup>1</sup>H and <sup>13</sup>C) and IR (KBr) of Compound CHJ04072:**

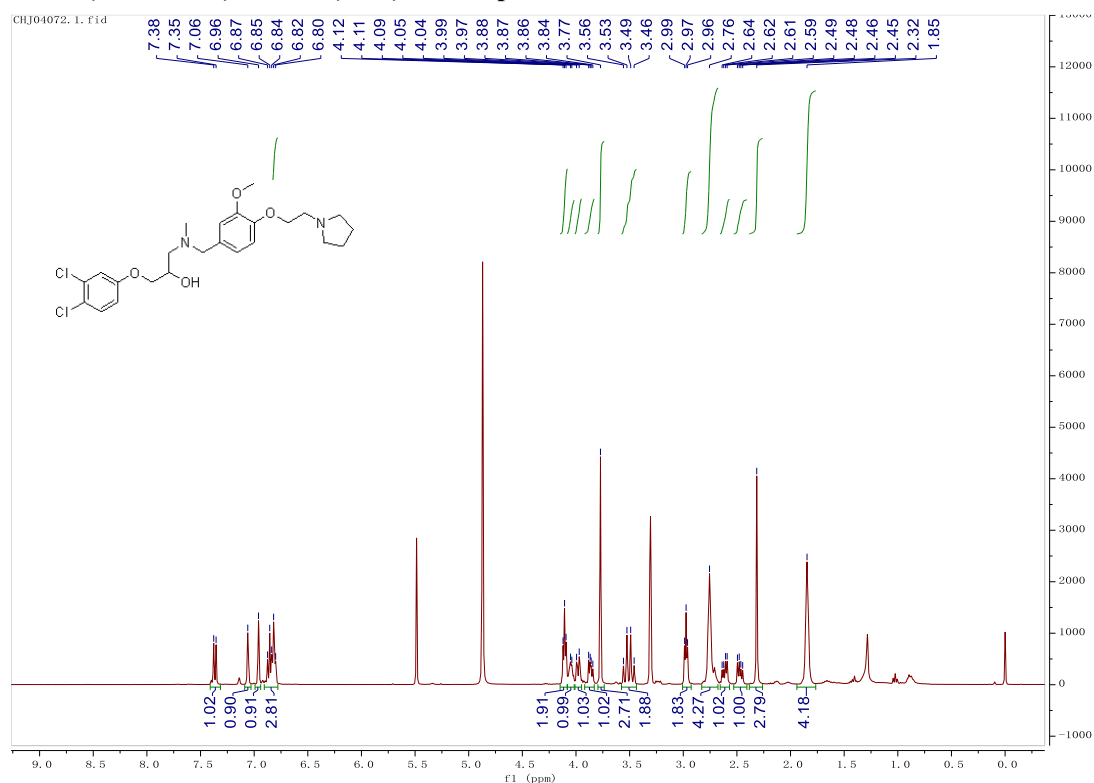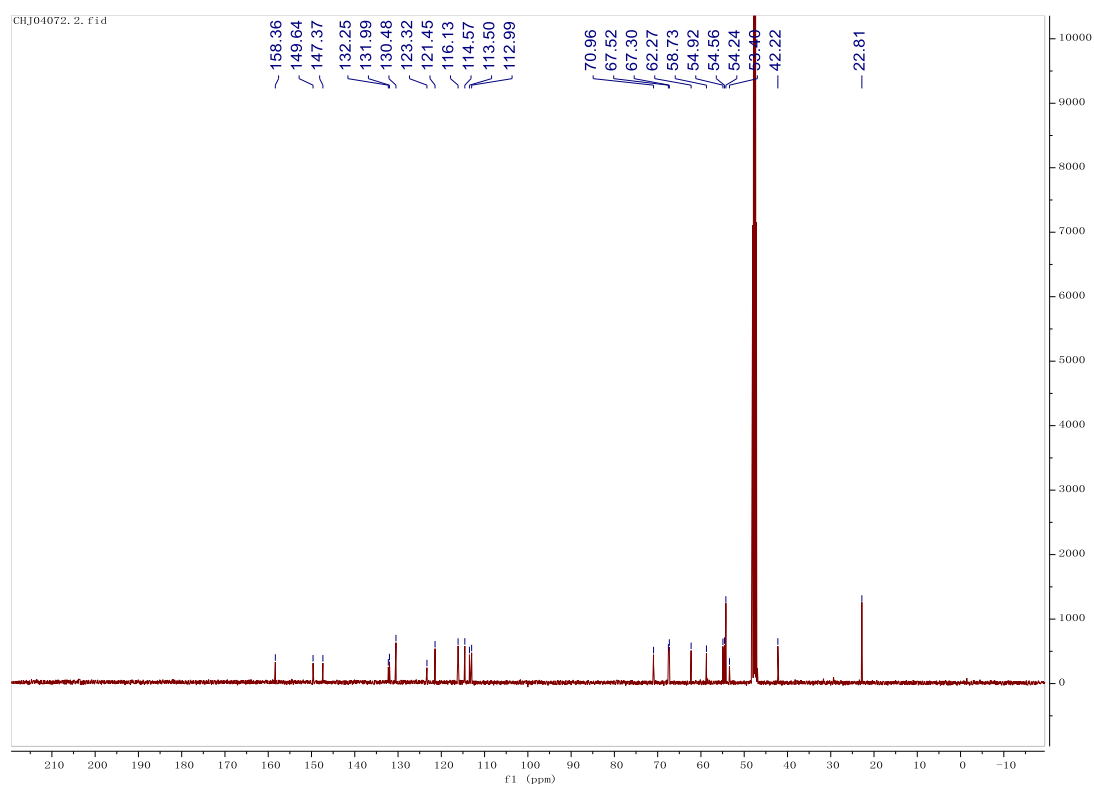

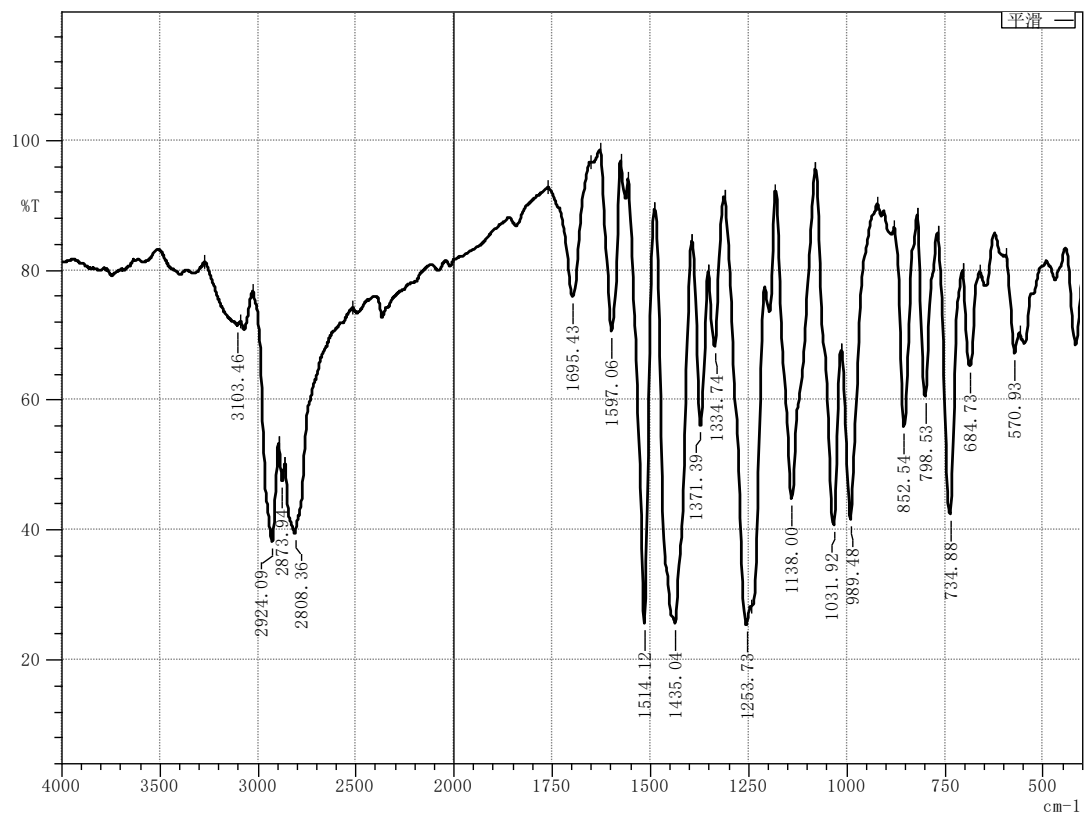

**NMR (<sup>1</sup>H and <sup>13</sup>C) and IR (KBr) of Compound CHJ04089:**

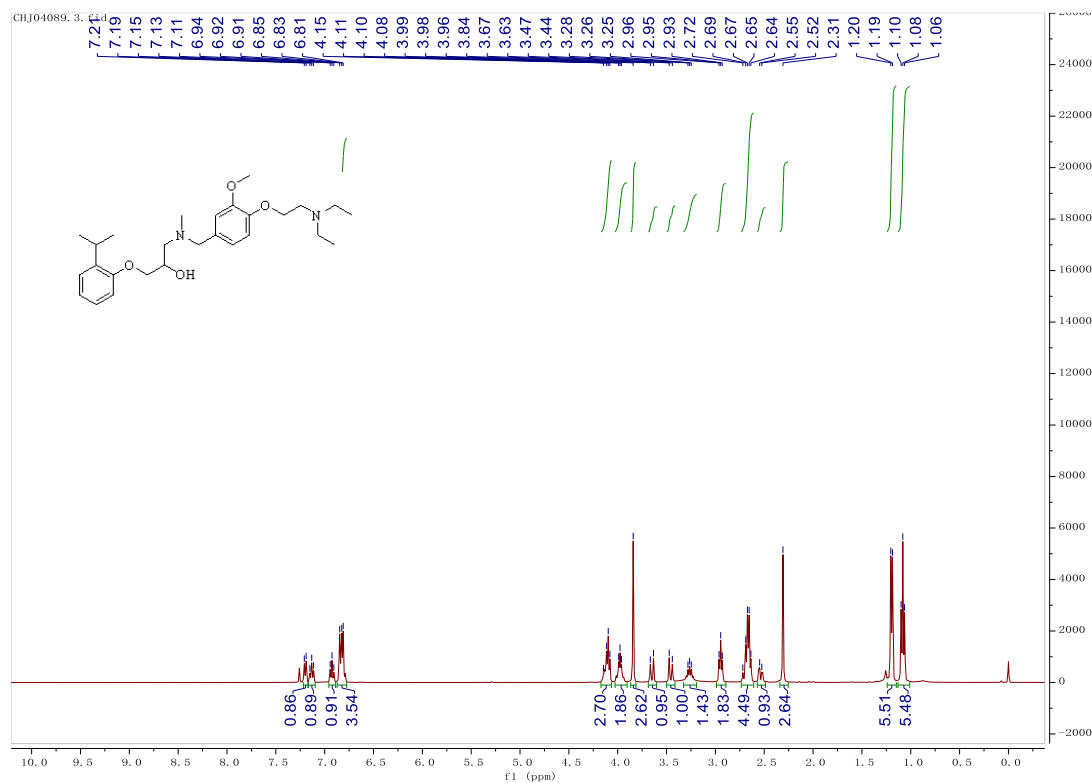



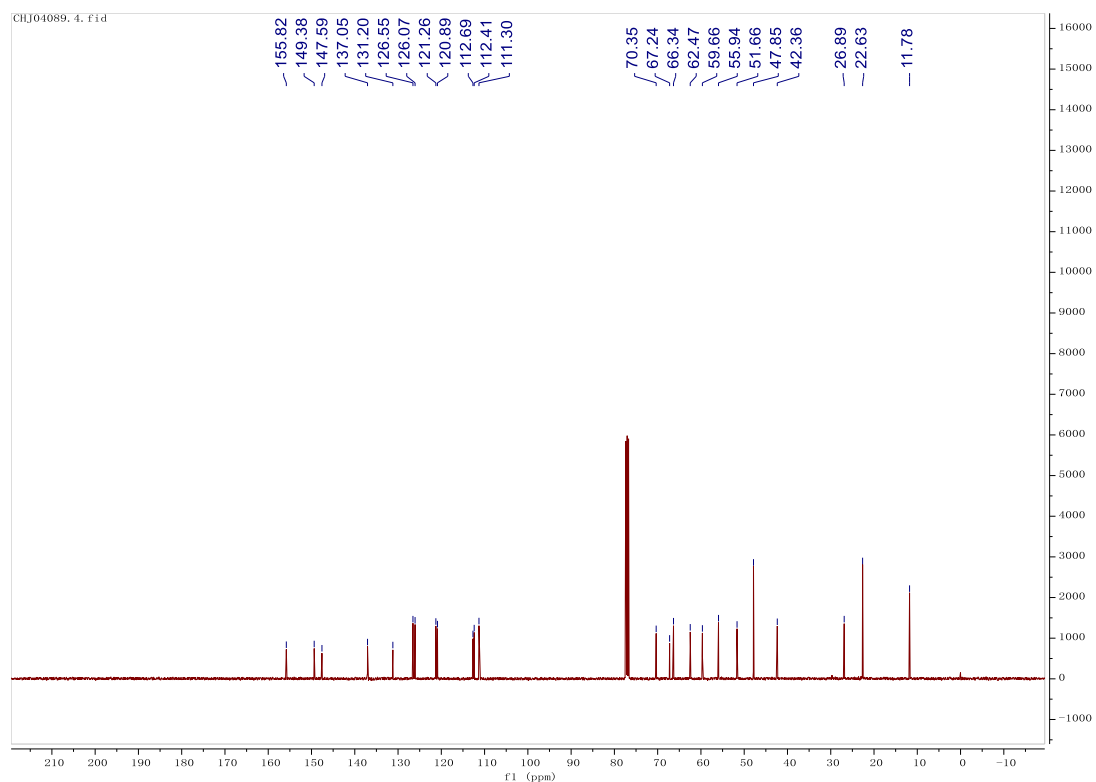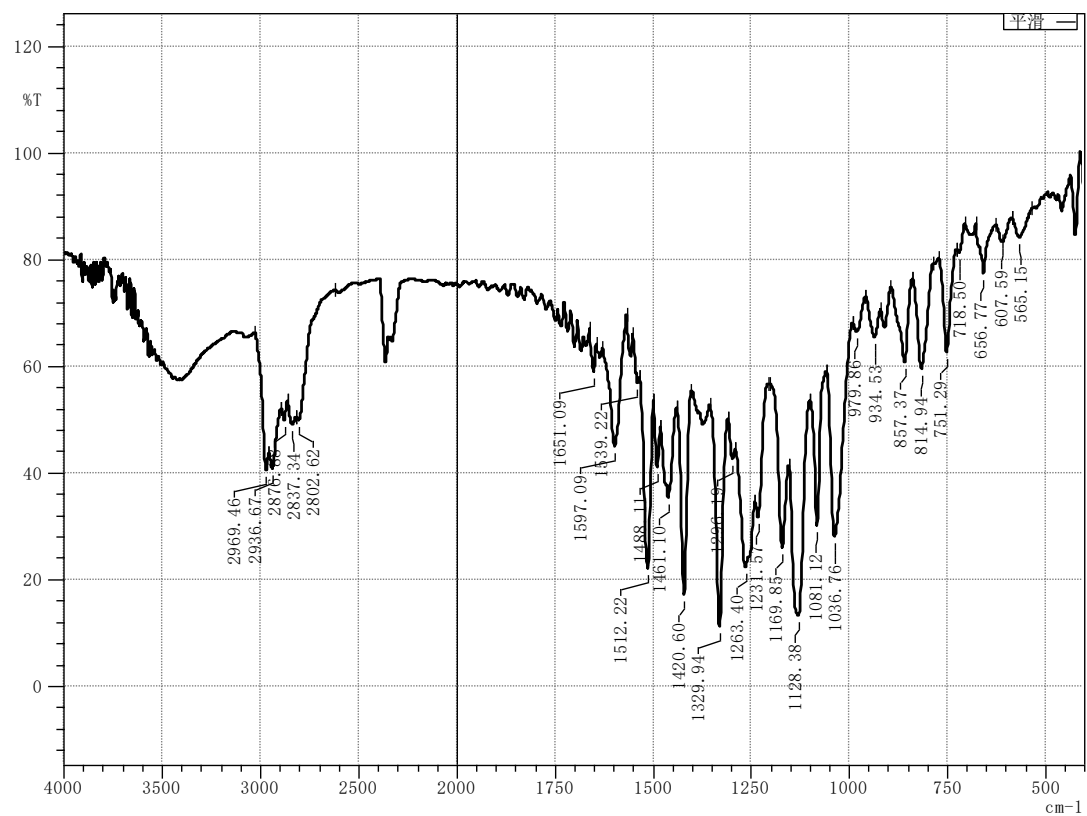

# **NMR (<sup>1</sup>H and <sup>13</sup>C) and IR (KBr) of Compound CHJ04090:**

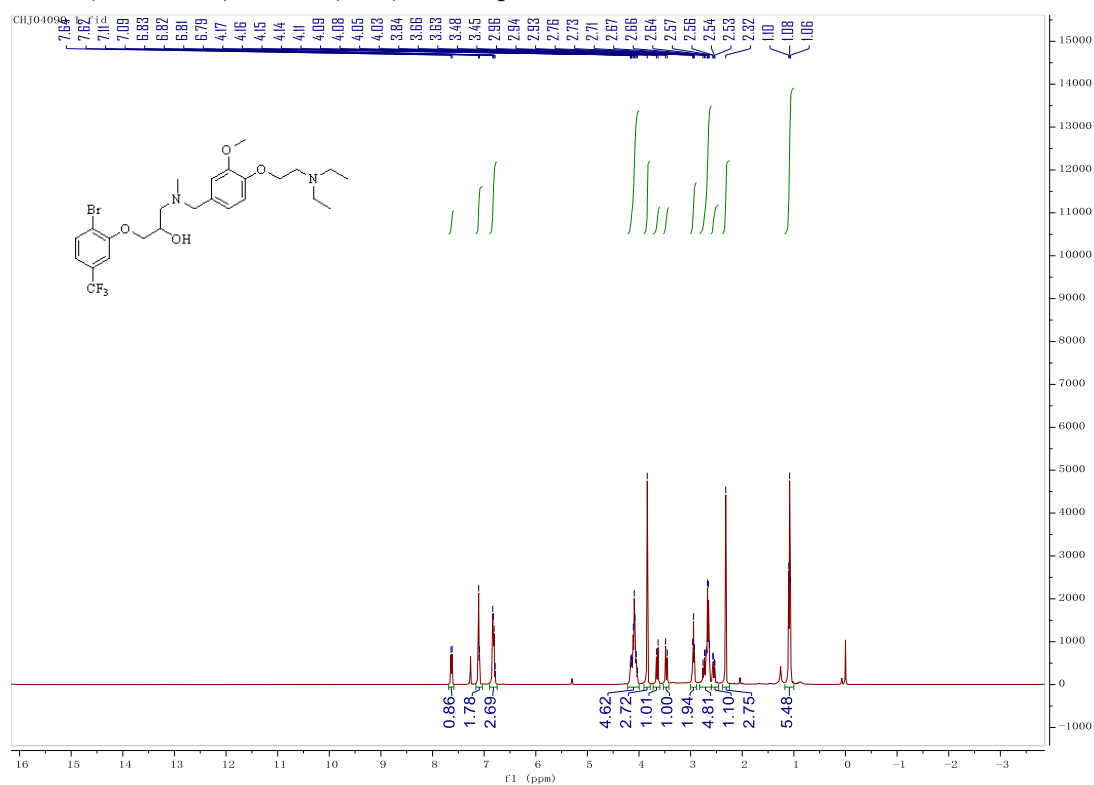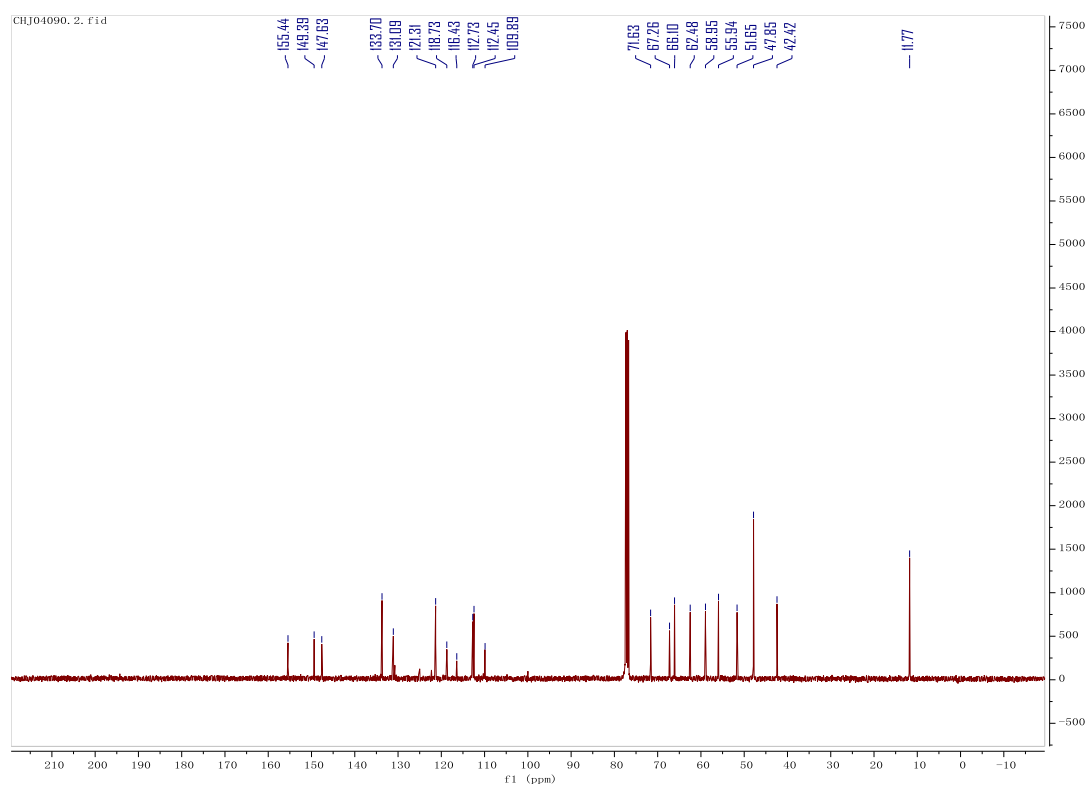

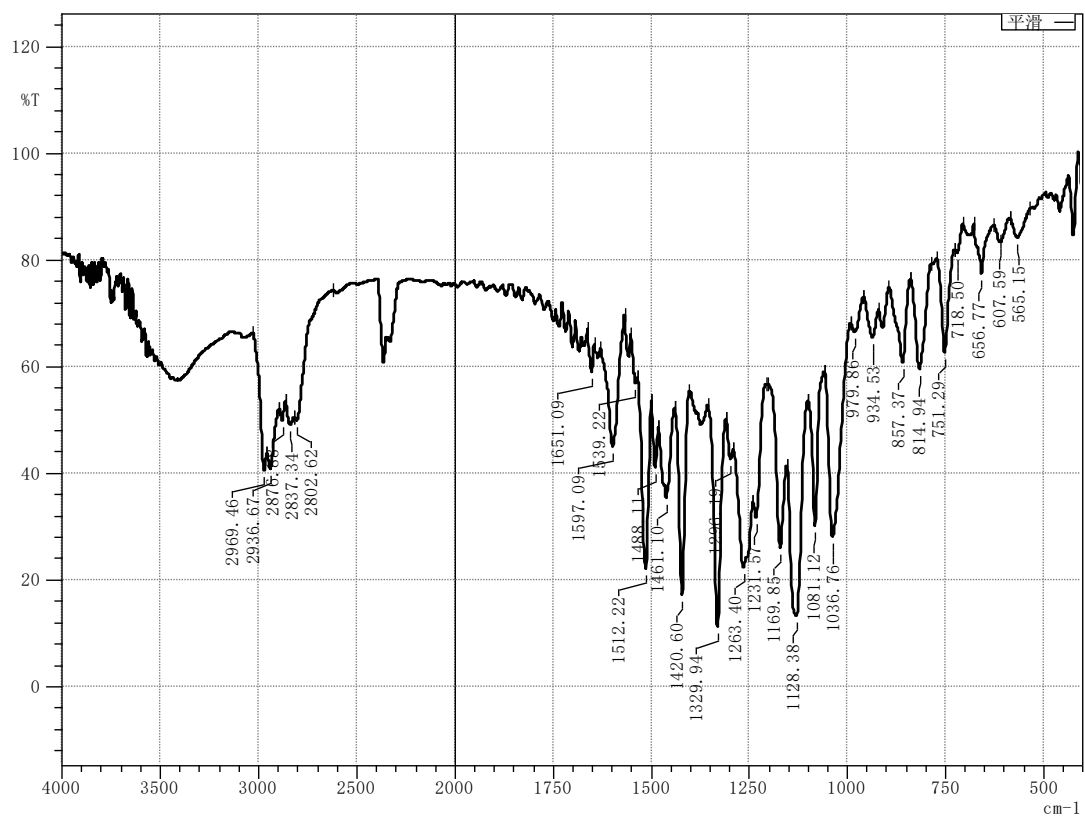

**NMR (<sup>1</sup>H and <sup>13</sup>C) and IR (KBr) of Compound CHJ04091:**

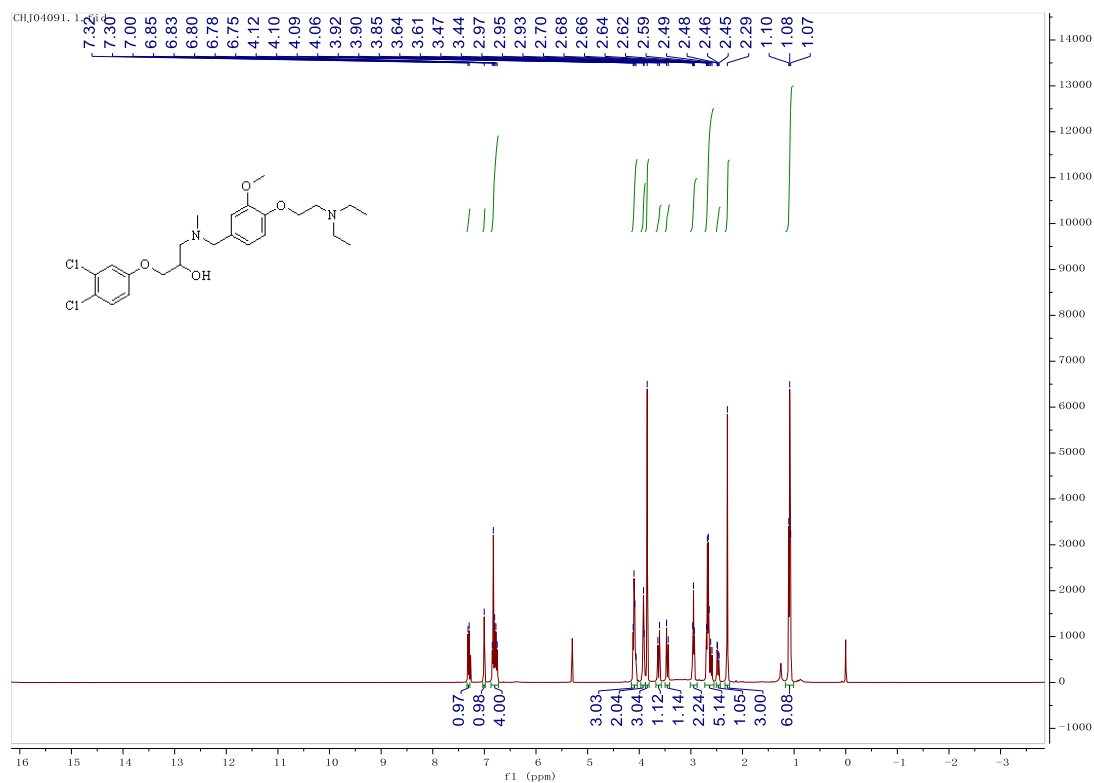

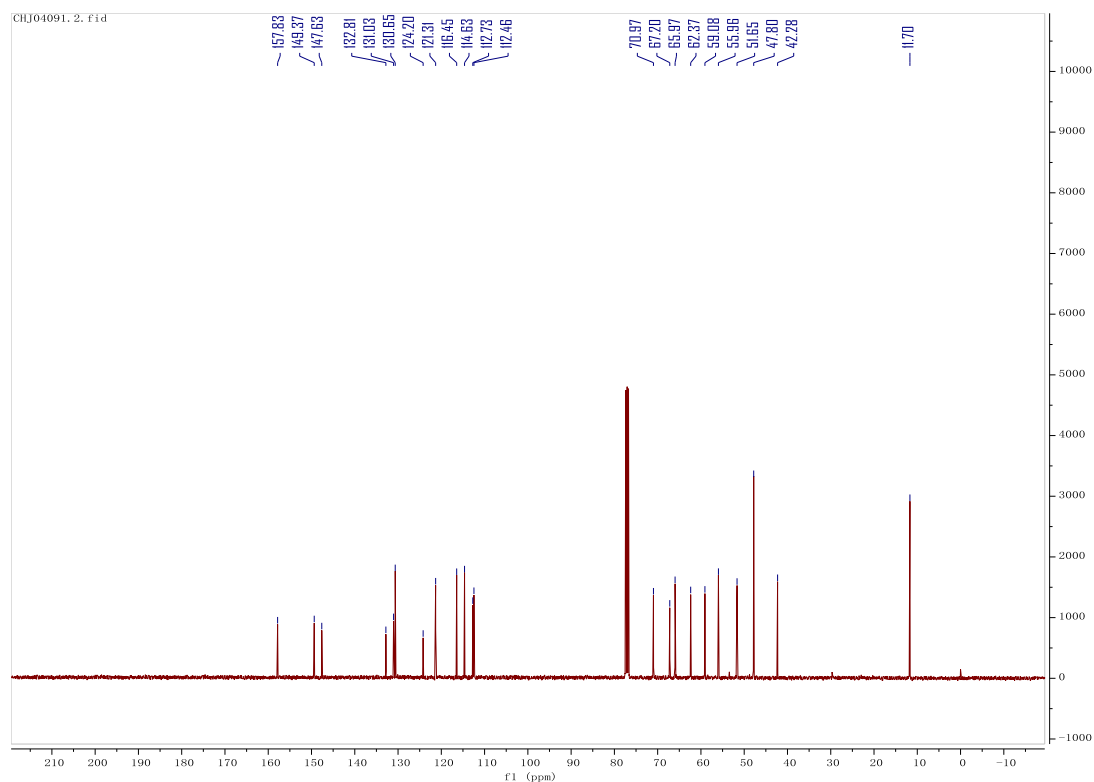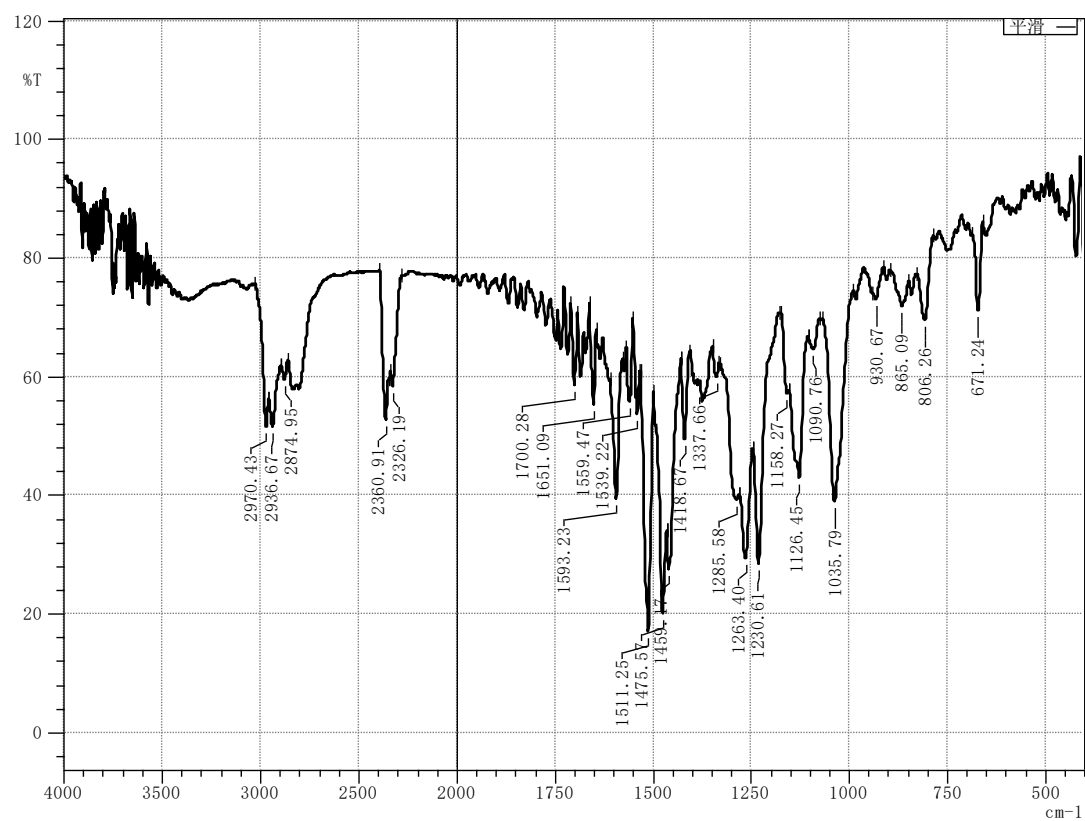

# **NMR (<sup>1</sup>H and <sup>13</sup>C) and IR (KBr) of Compound CHJ04092:**

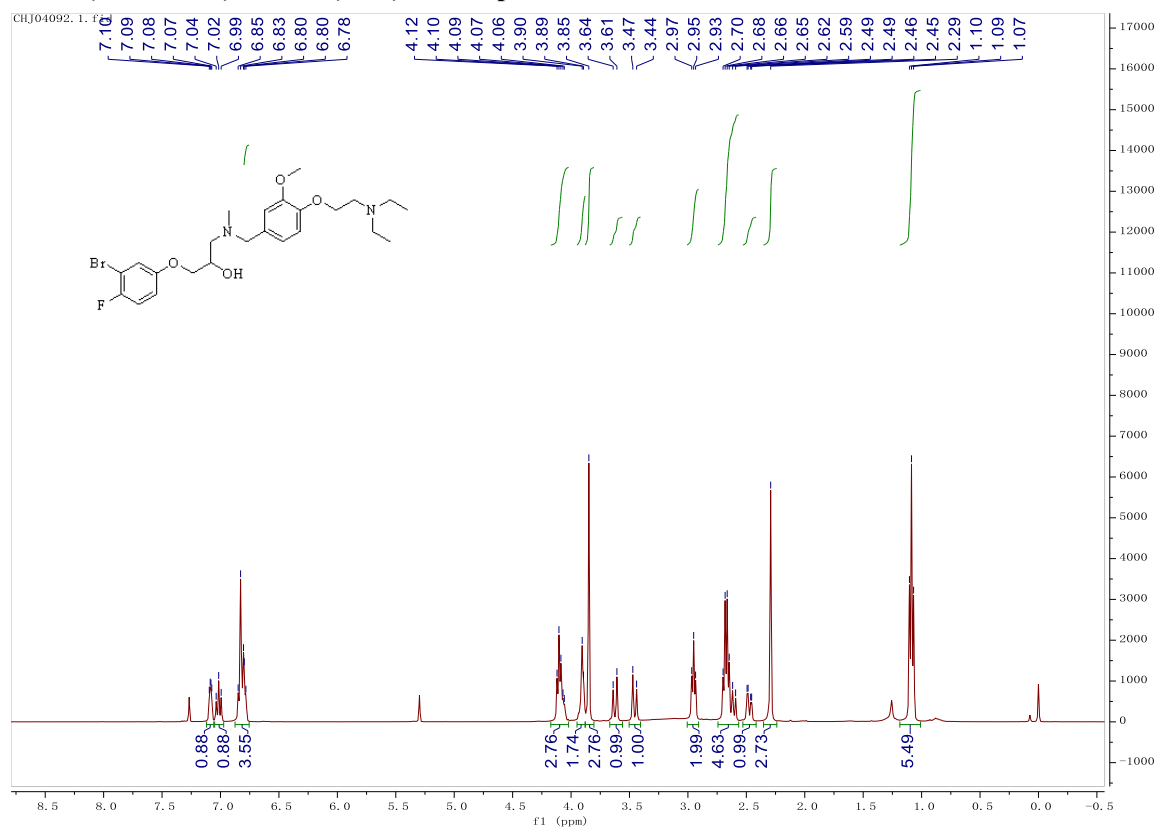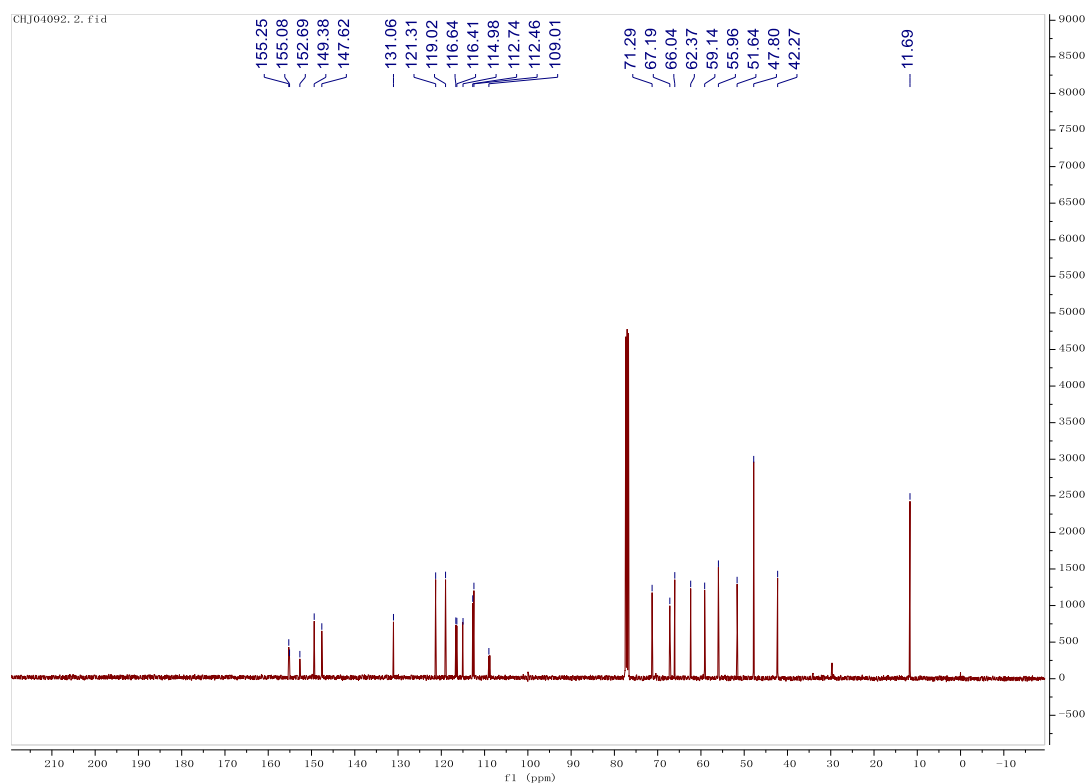

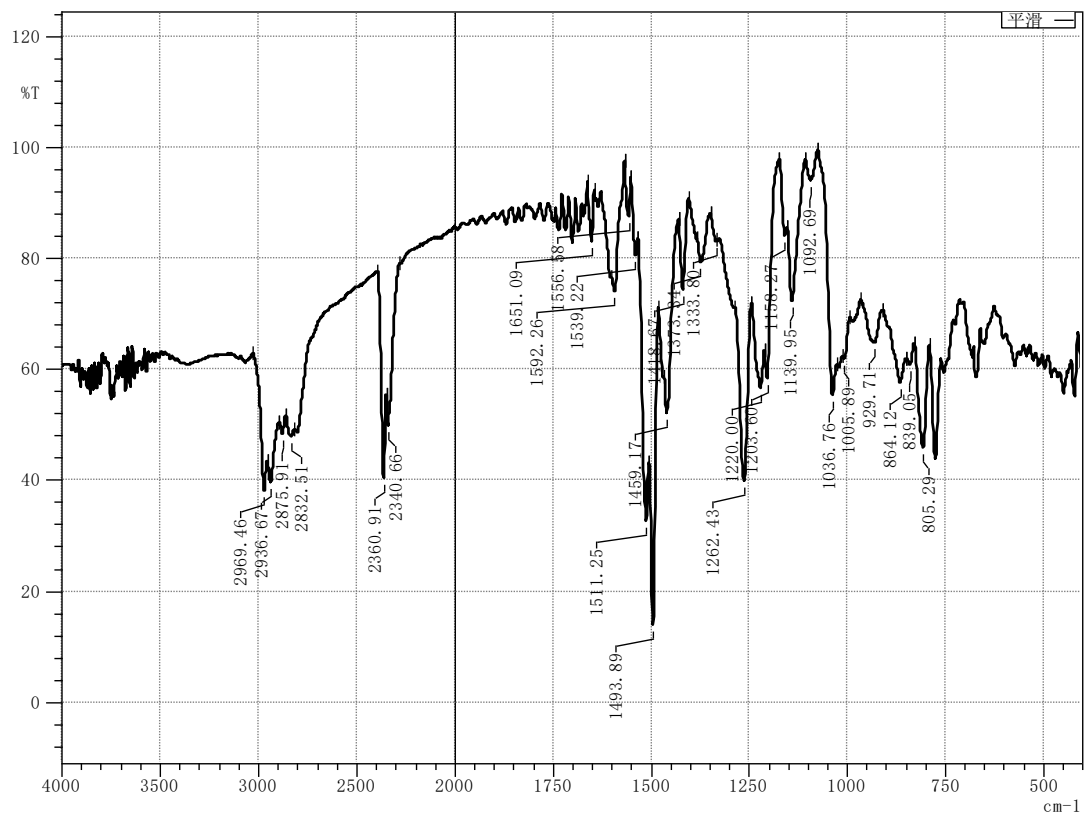

**NMR (<sup>1</sup>H and <sup>13</sup>C) and IR (KBr) of Compound CHJ04093:**

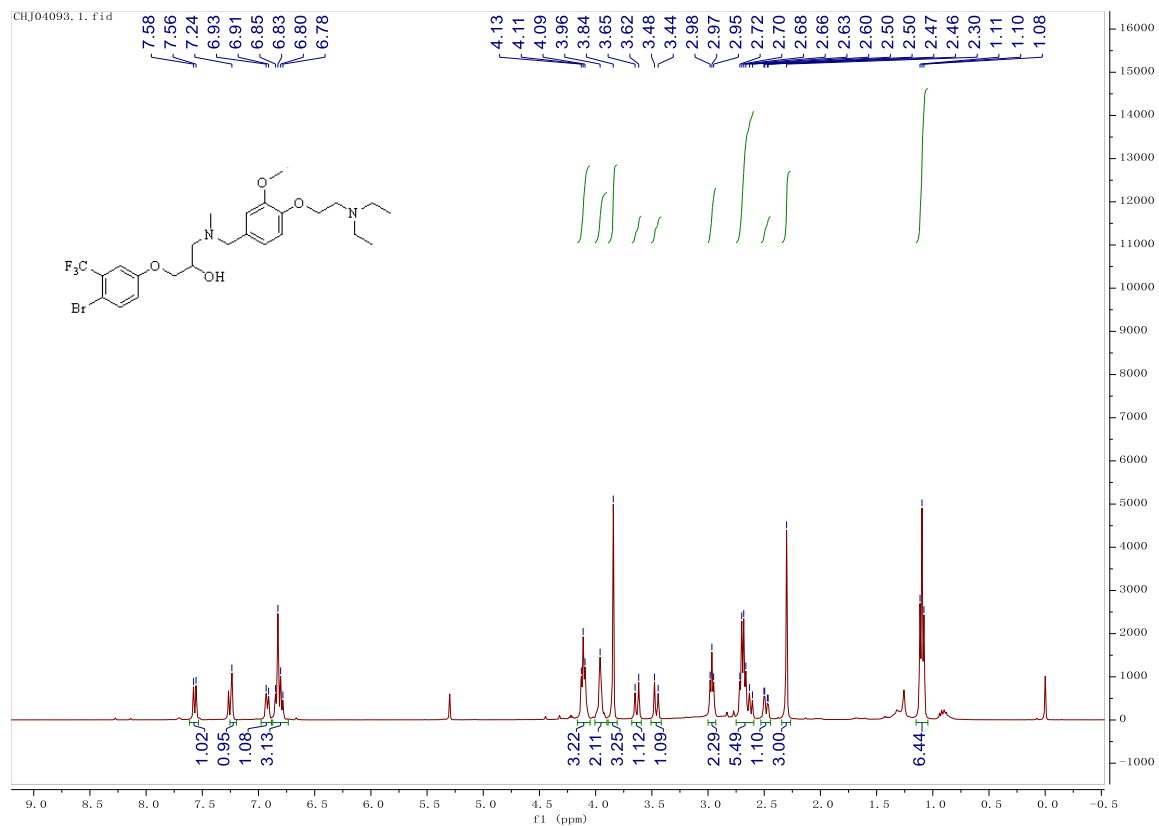

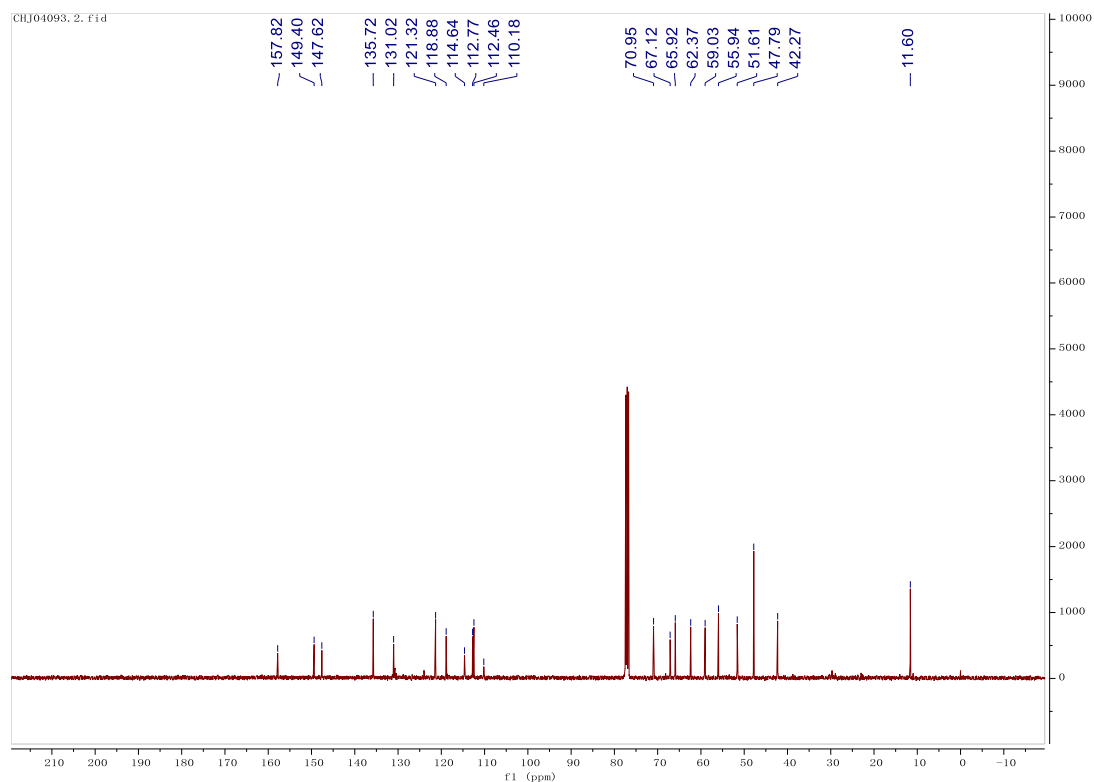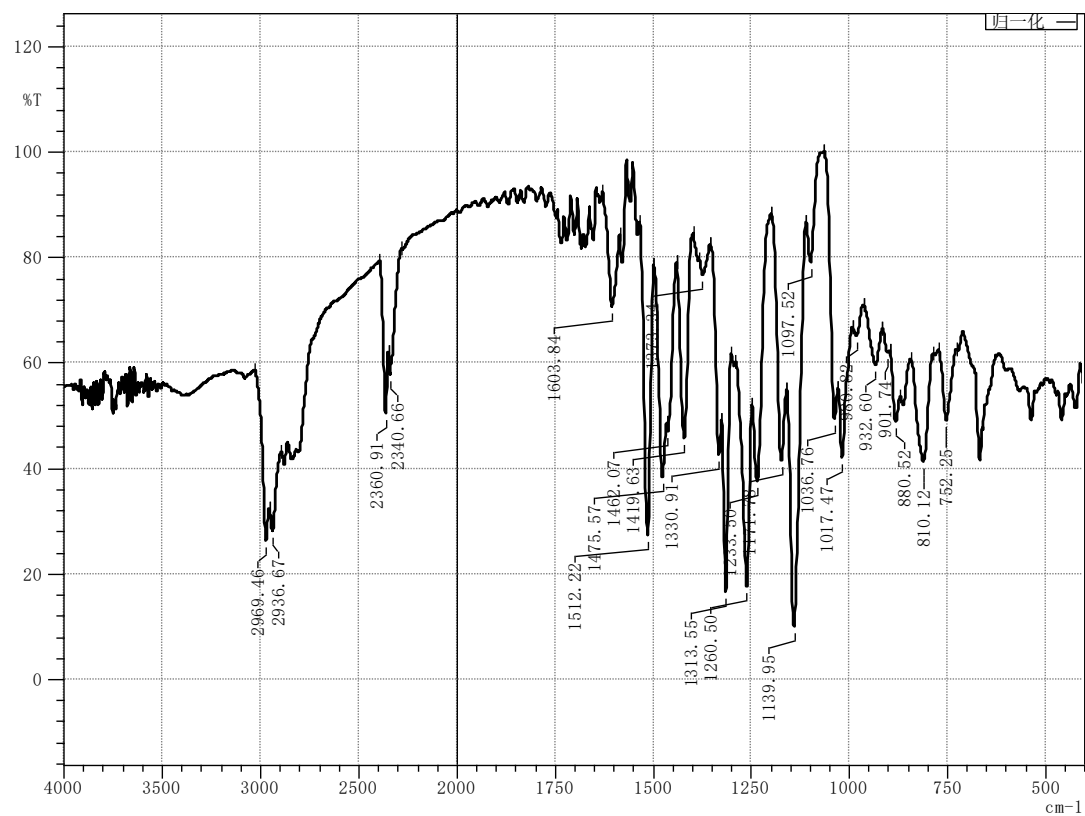

# **NMR (<sup>1</sup>H and <sup>13</sup>C) and IR (KBr) of Compound CHJ04094:**

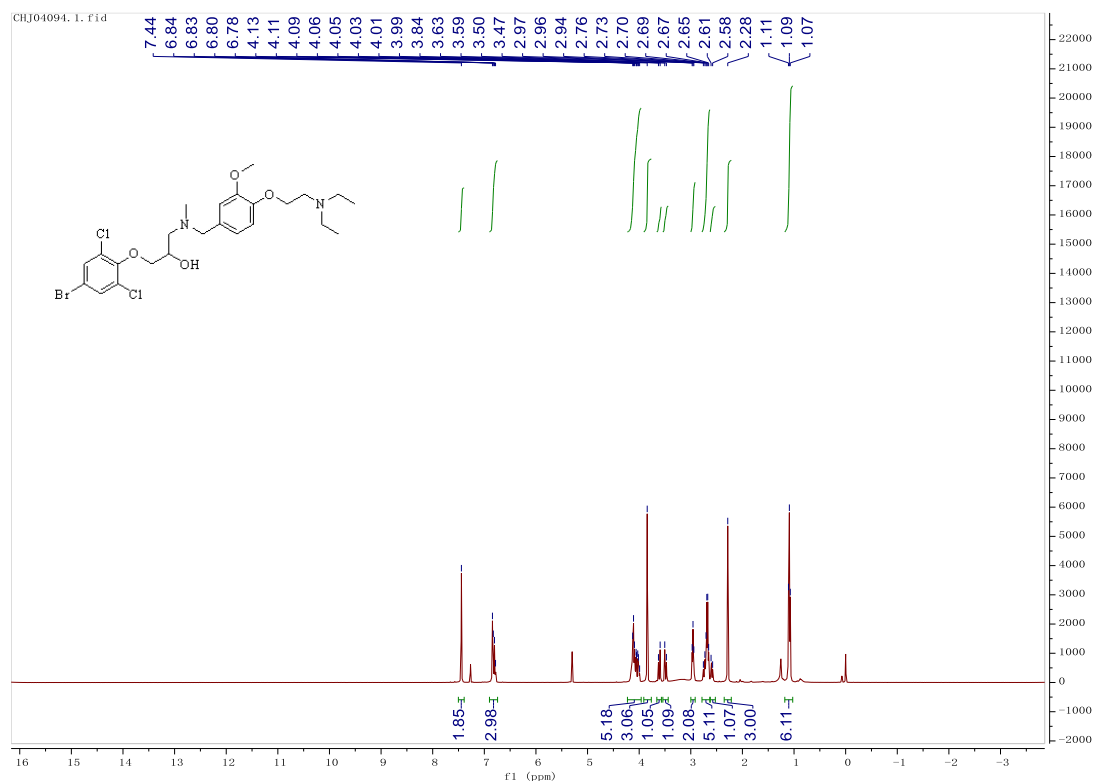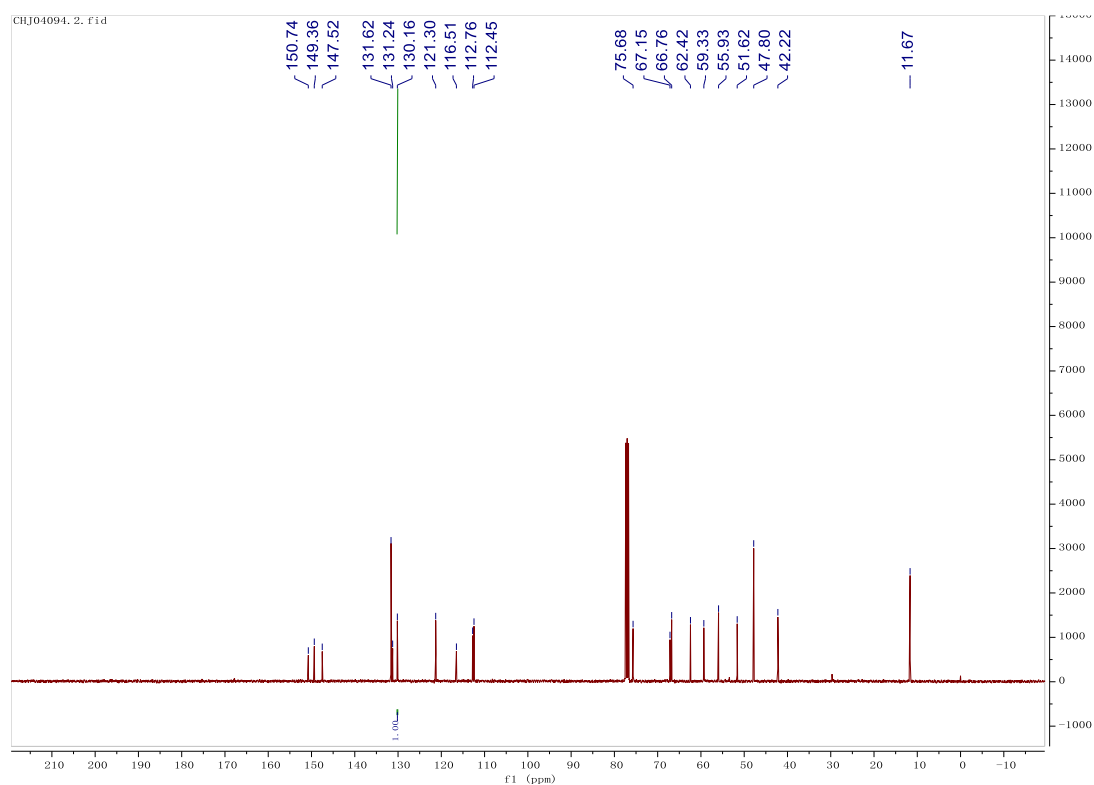



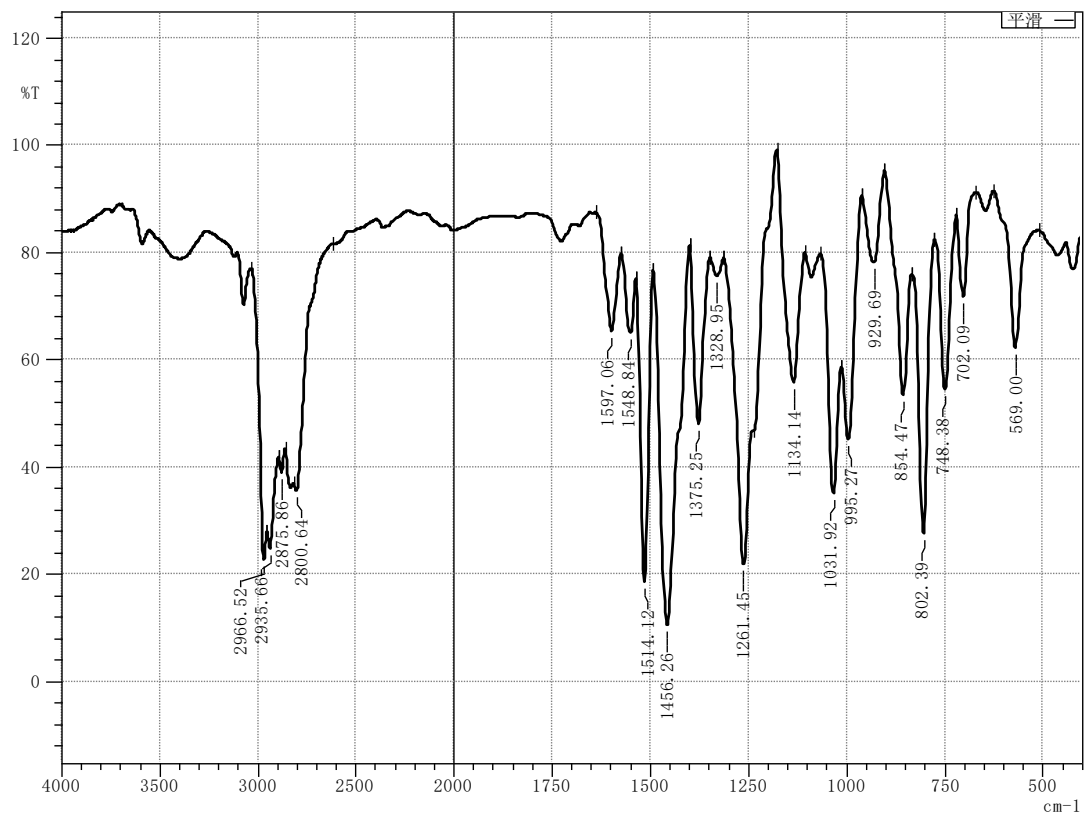

### NMR (<sup>1</sup>H and <sup>13</sup>C) and IR (KBr) of Compound CHJ04097:

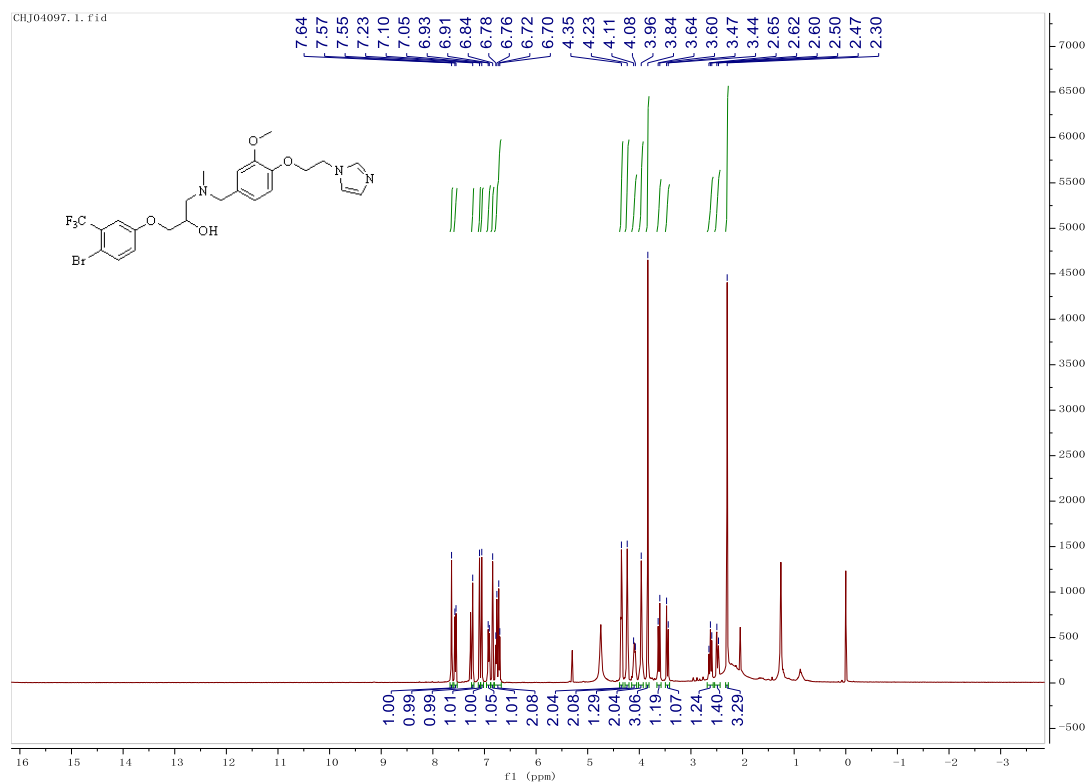

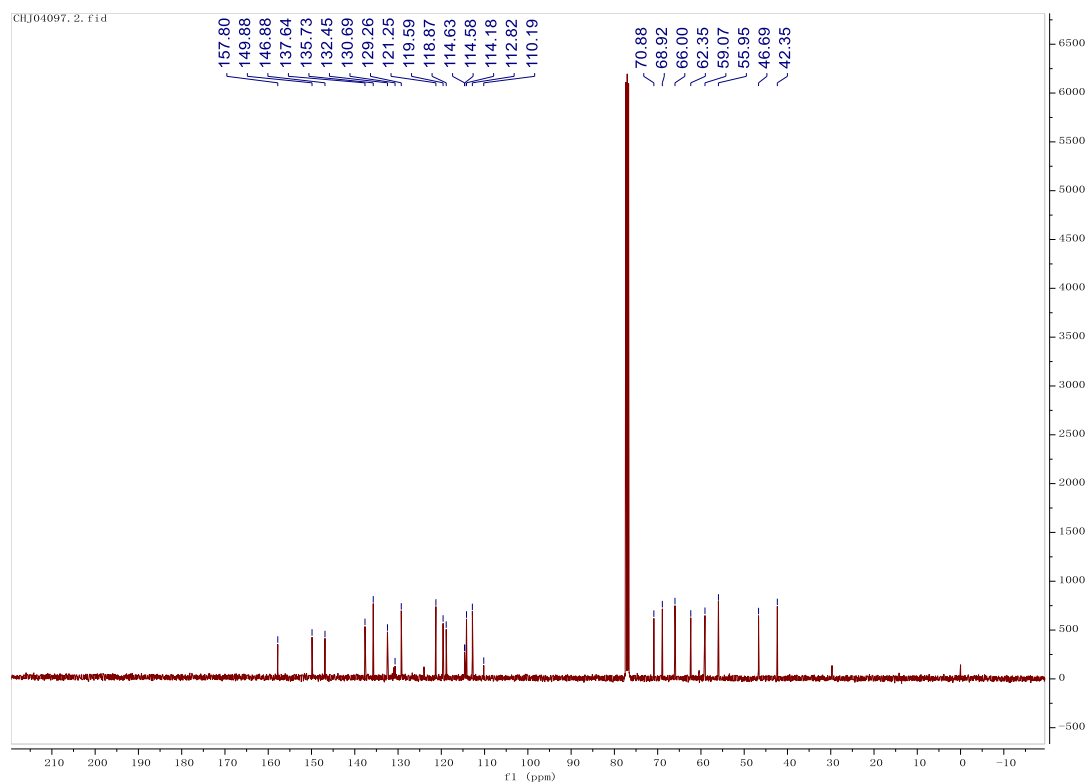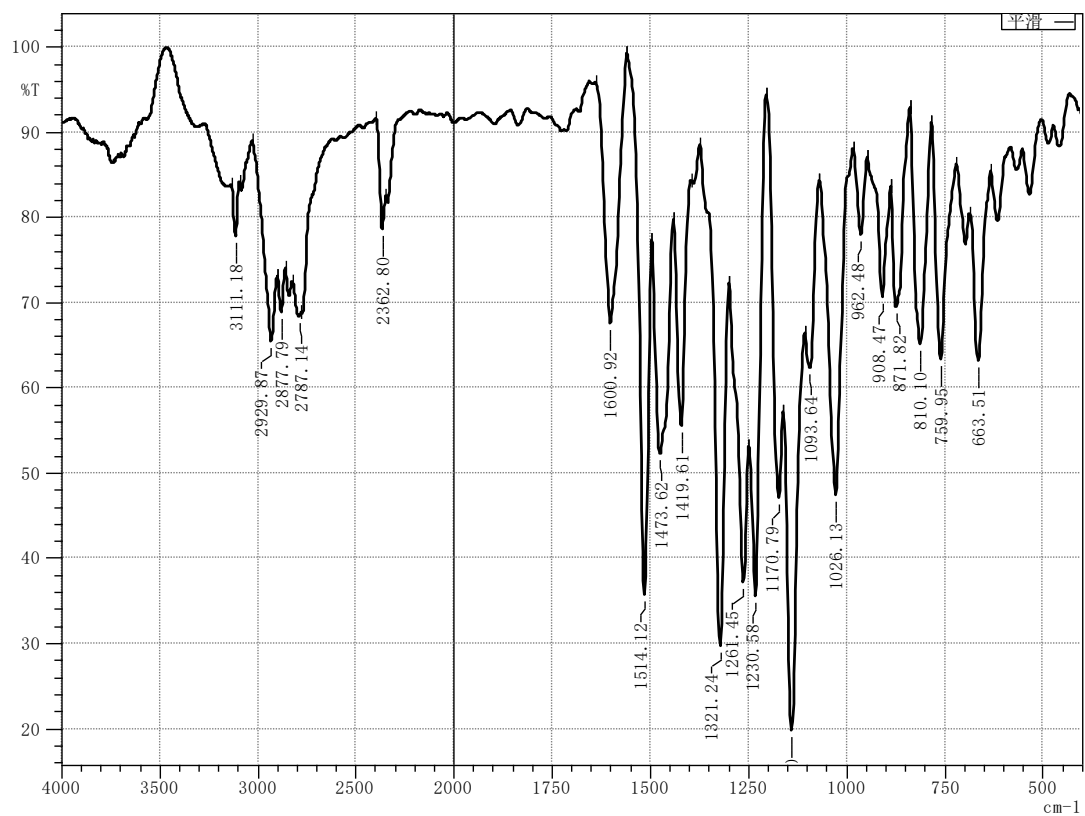

# **NMR (<sup>1</sup>H and <sup>13</sup>C) and IR (KBr) of Compound CHJ04099:**

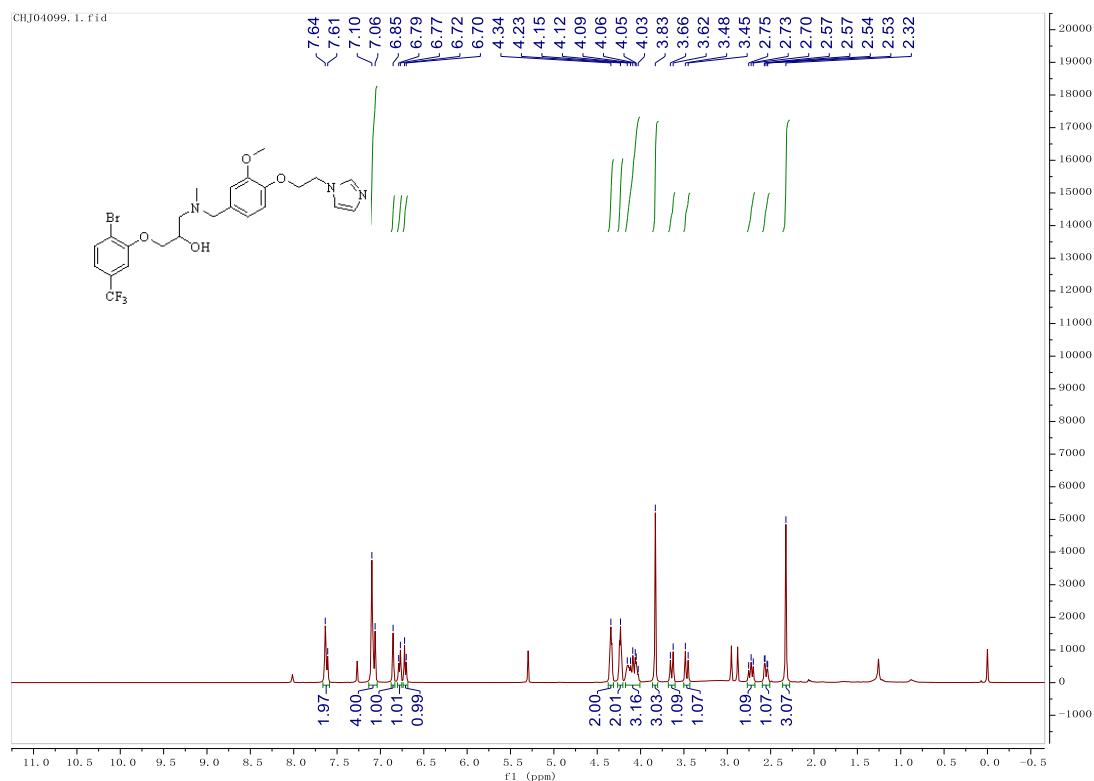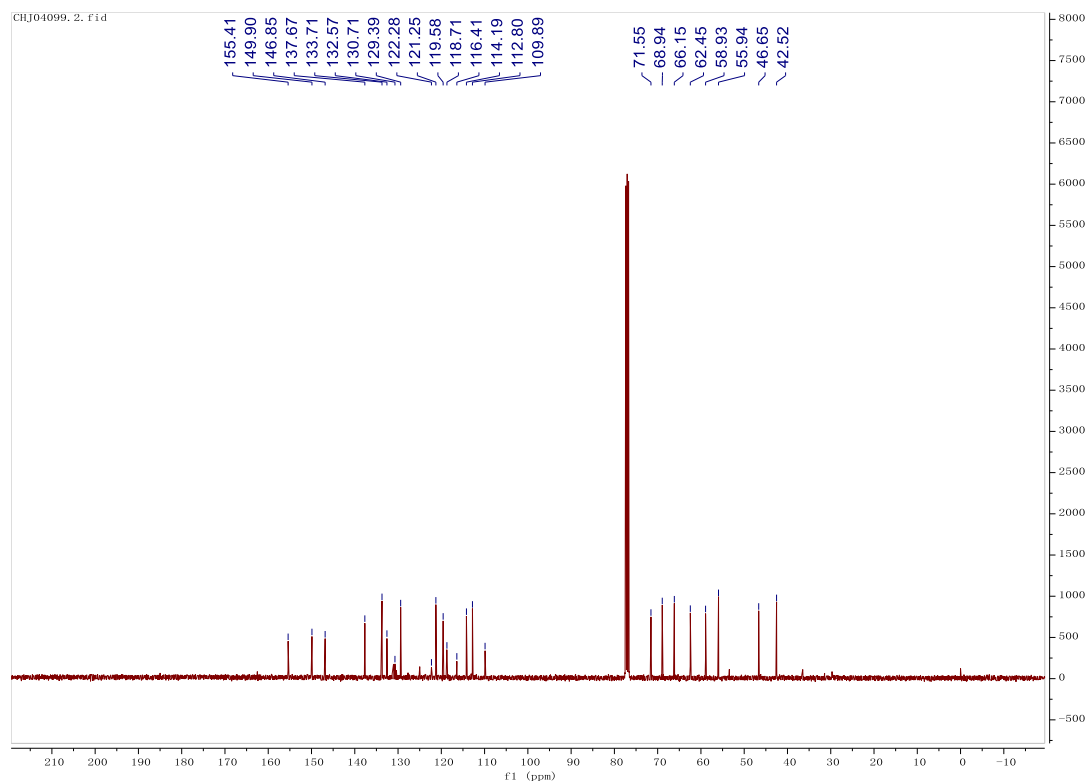

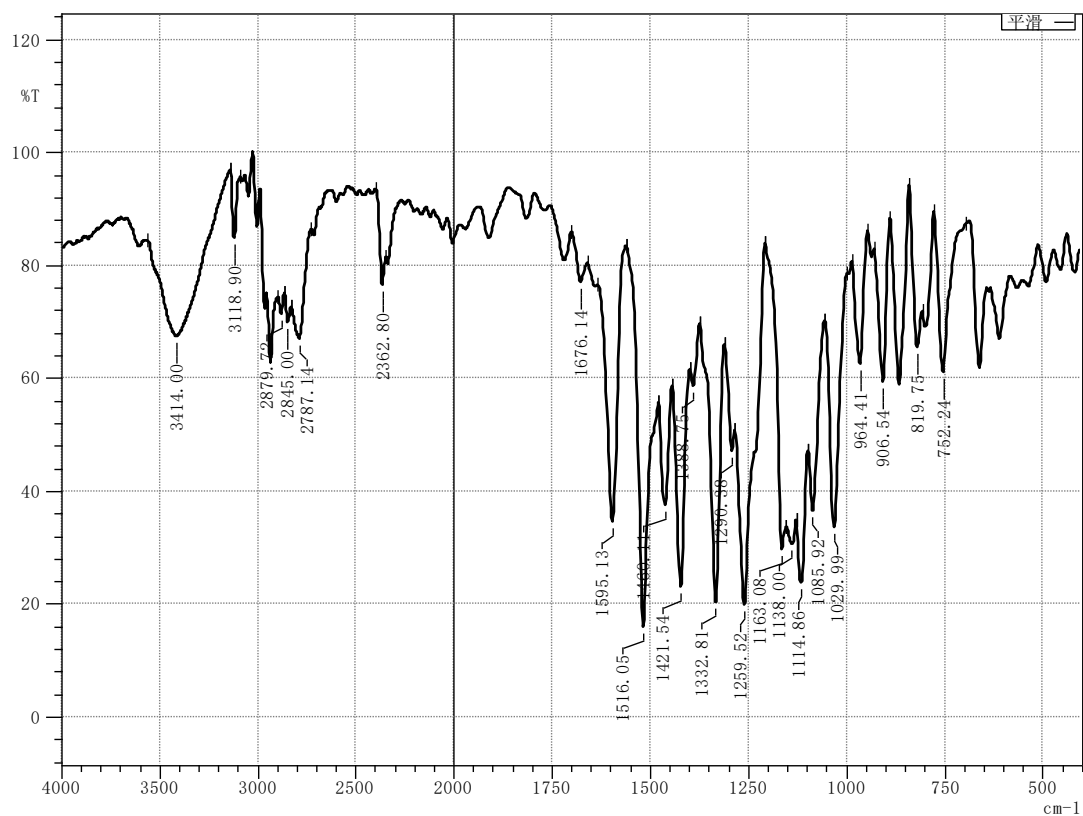

**NMR (<sup>1</sup>H and <sup>13</sup>C) and IR (KBr) of Compound CHJ05001:**

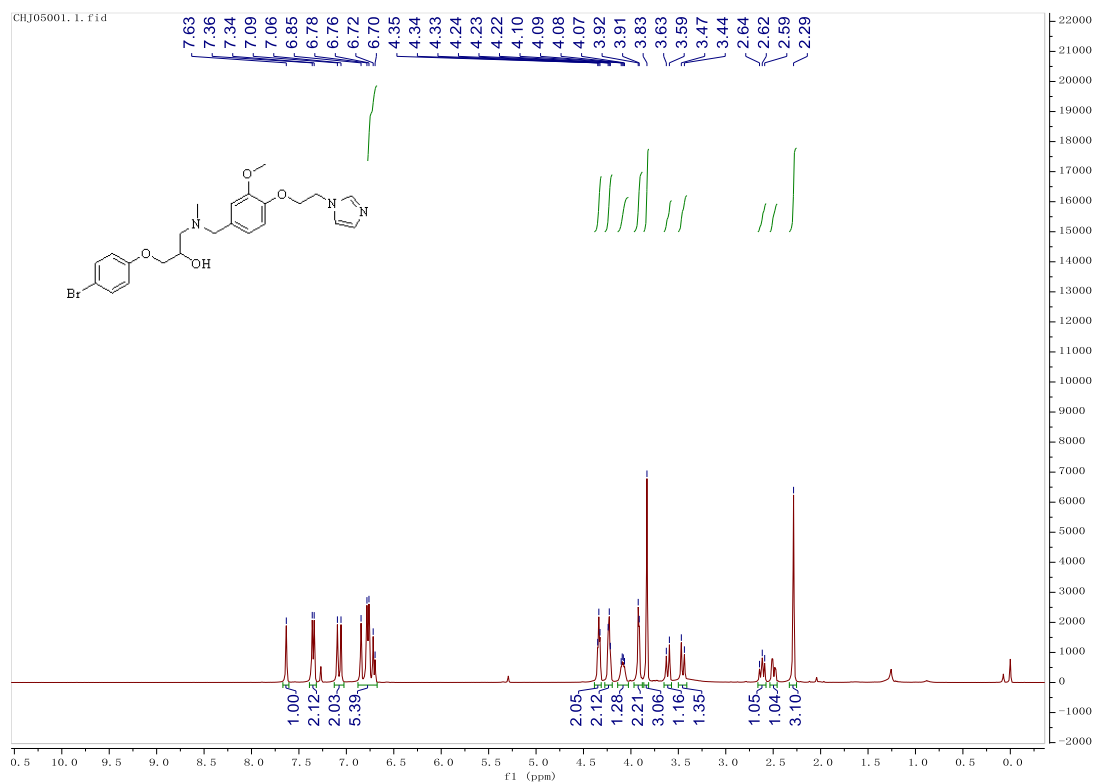

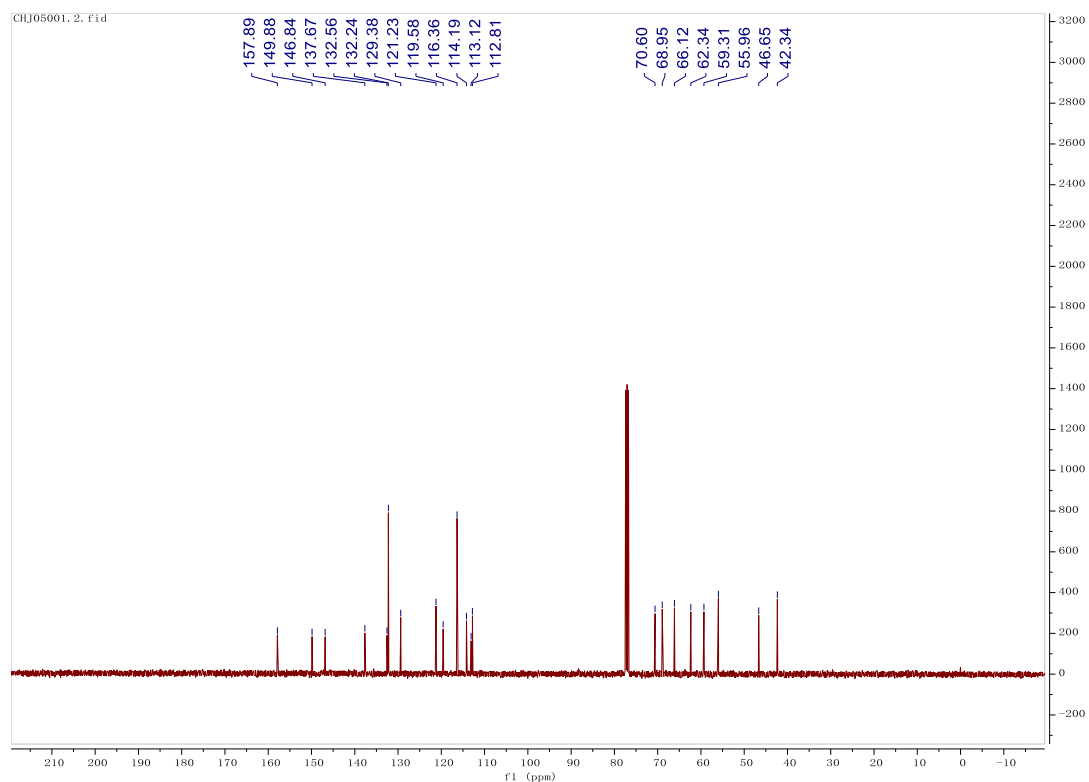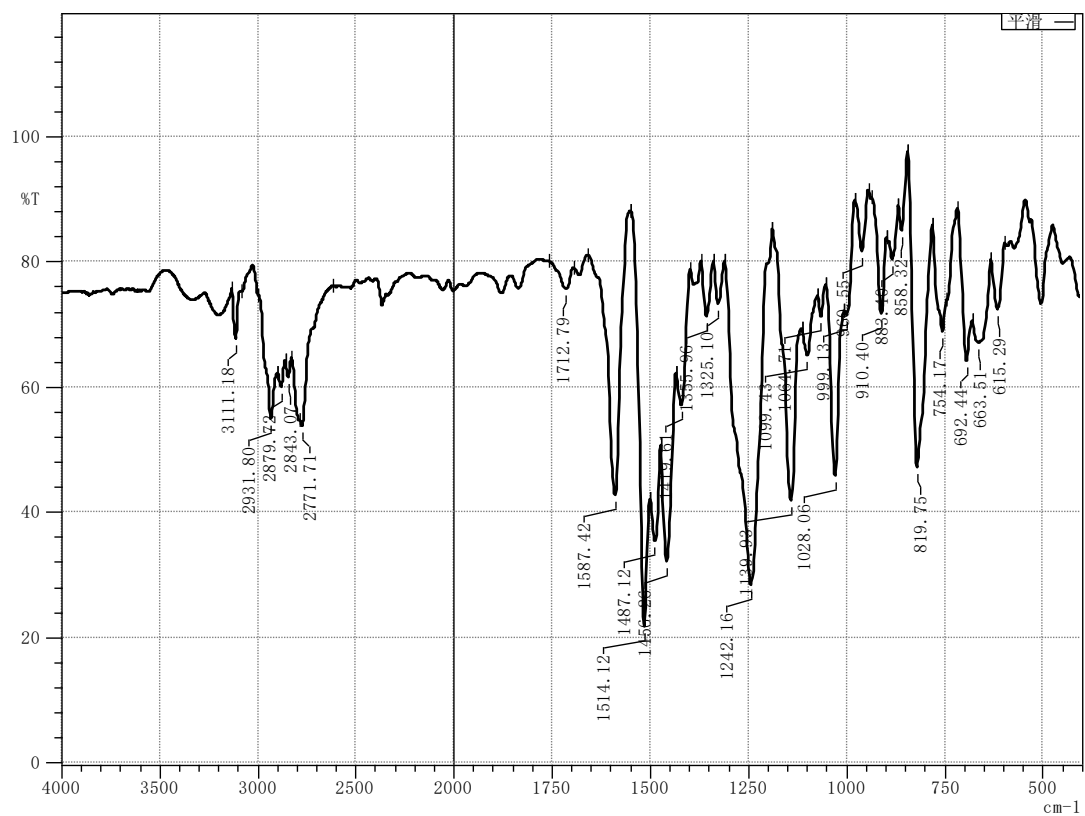

# **NMR (<sup>1</sup>H and <sup>13</sup>C) and IR (KBr) of Compound CHJ05002:**

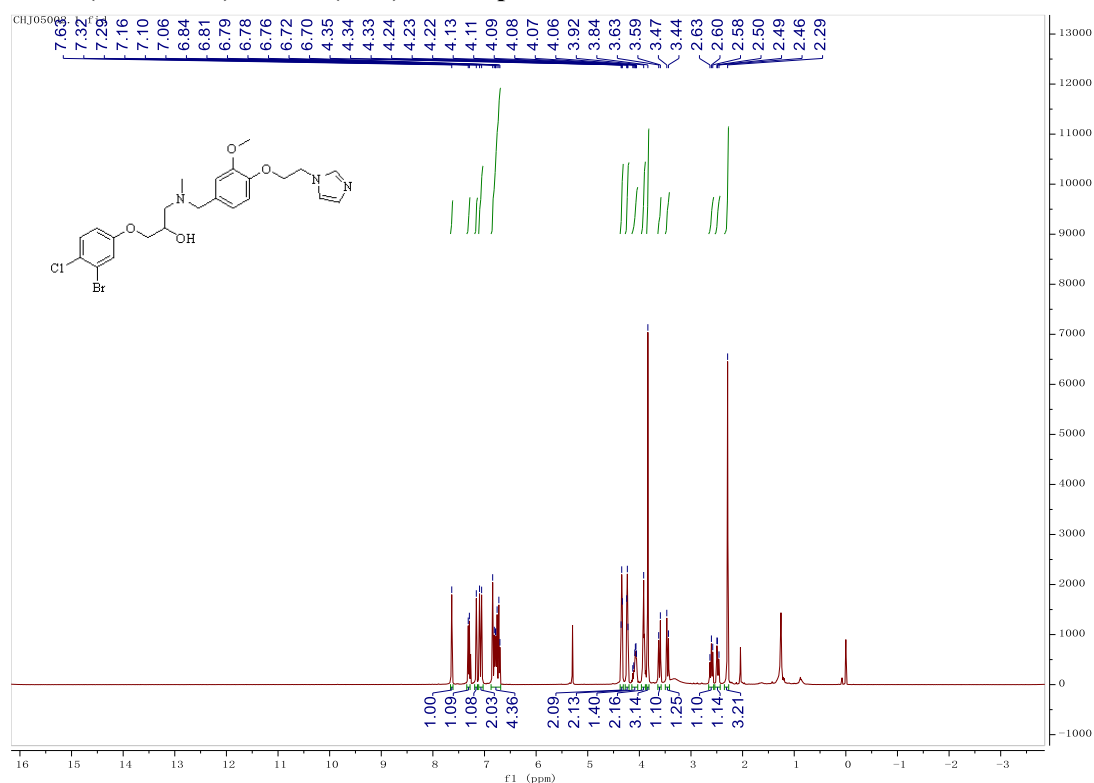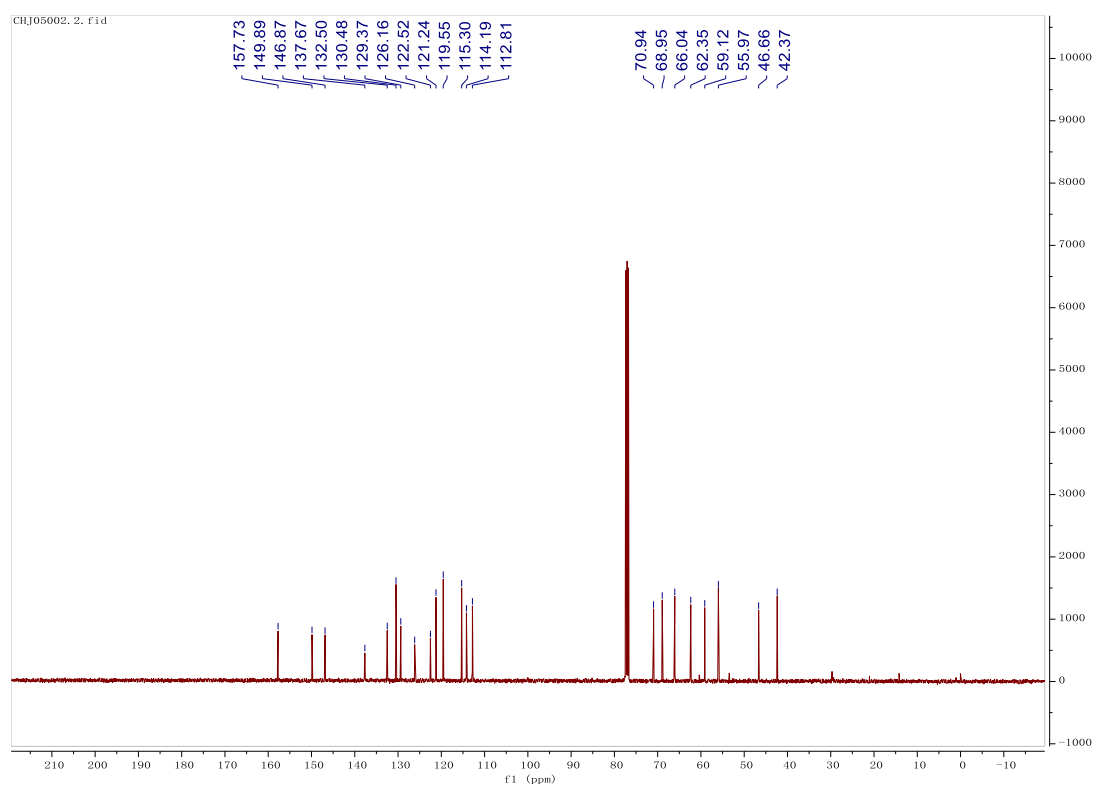

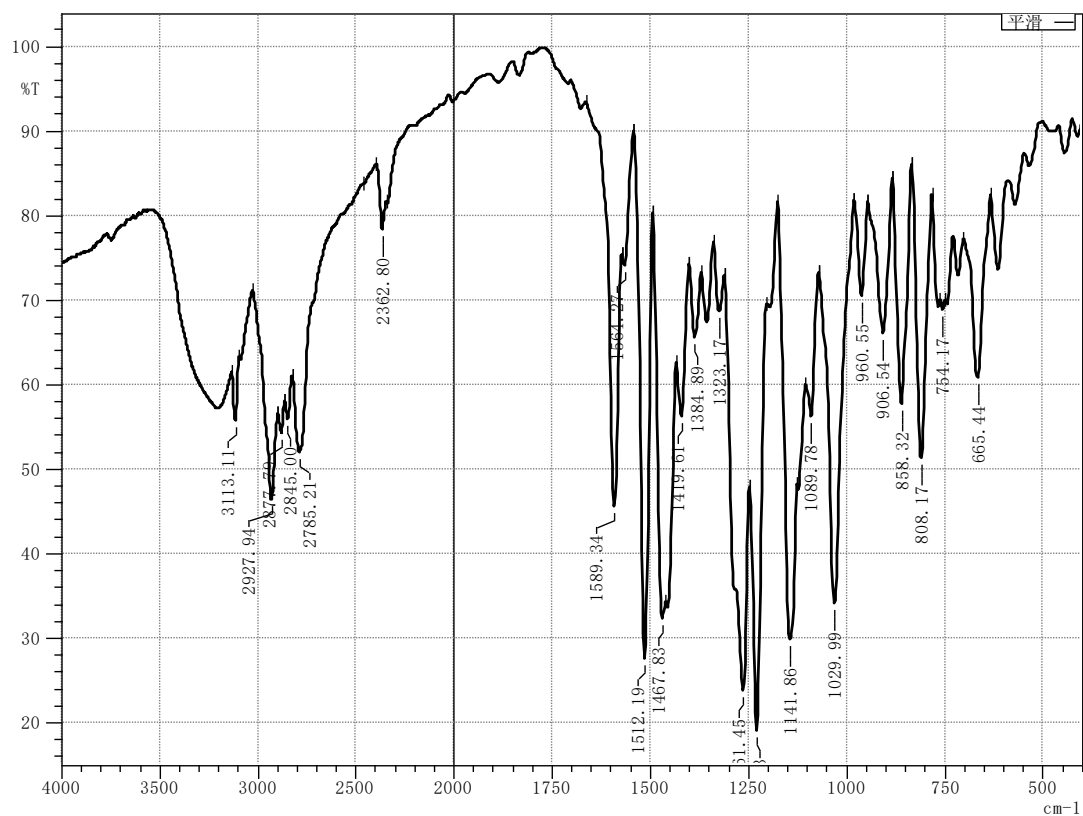

**NMR (<sup>1</sup>H and <sup>13</sup>C) and IR (KBr) of Compound CHJ05003:**

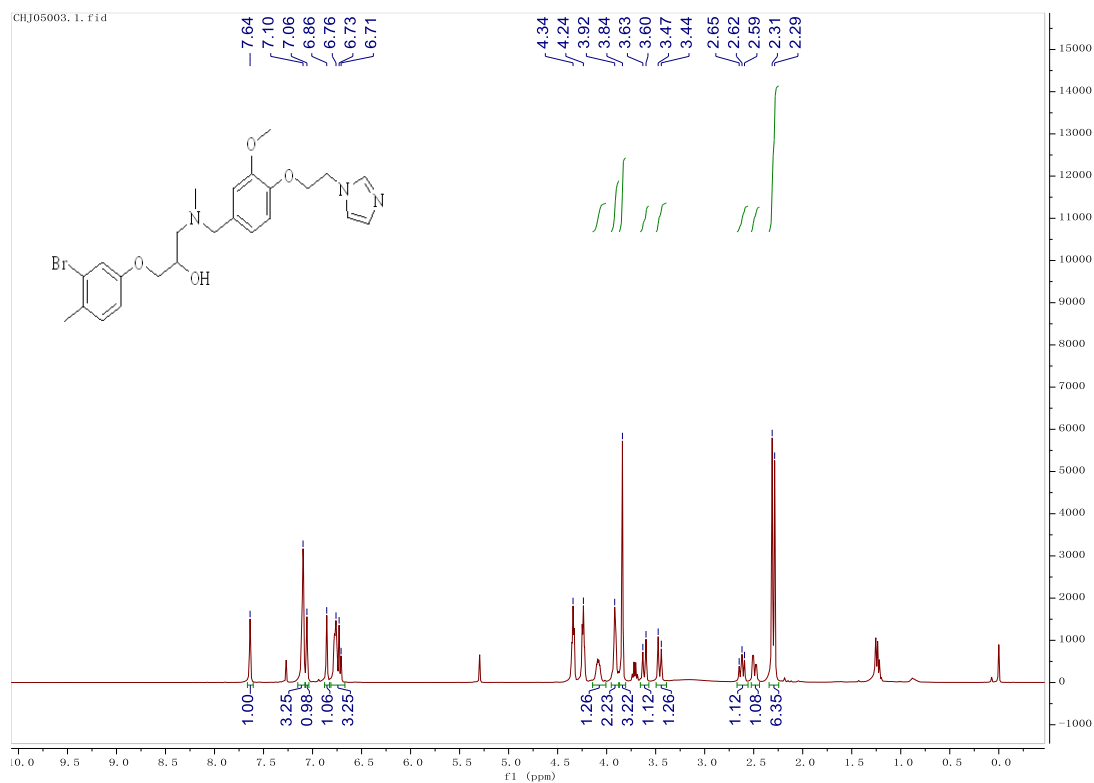

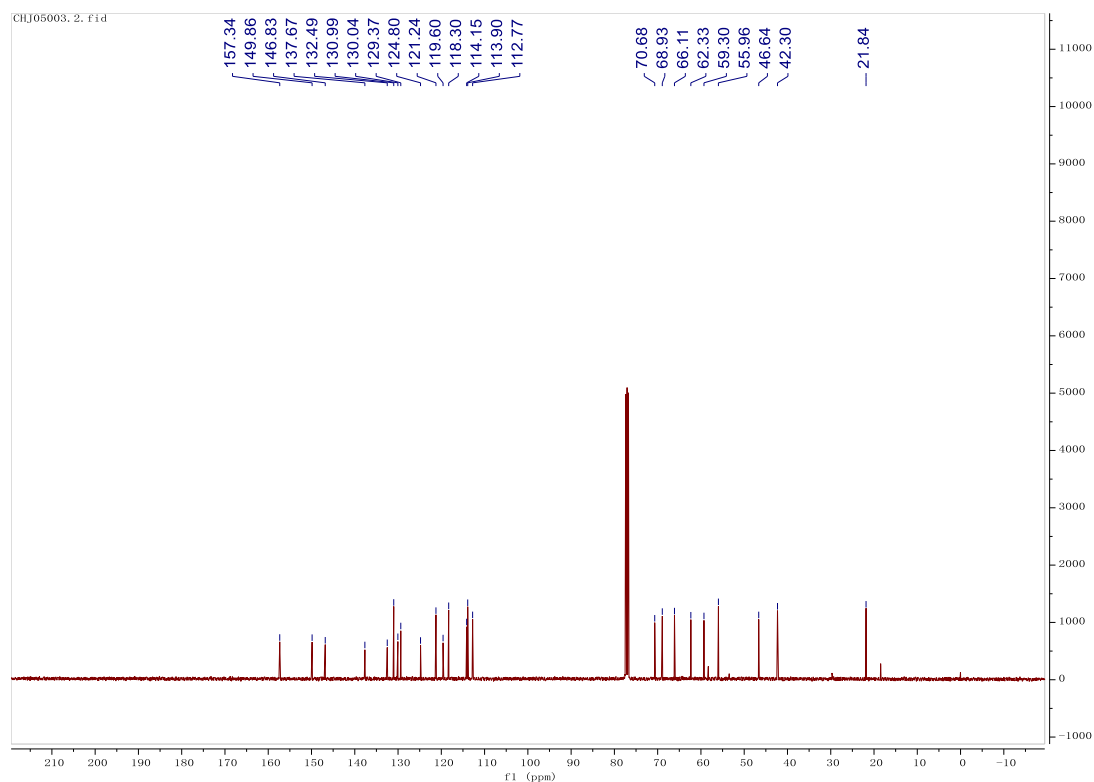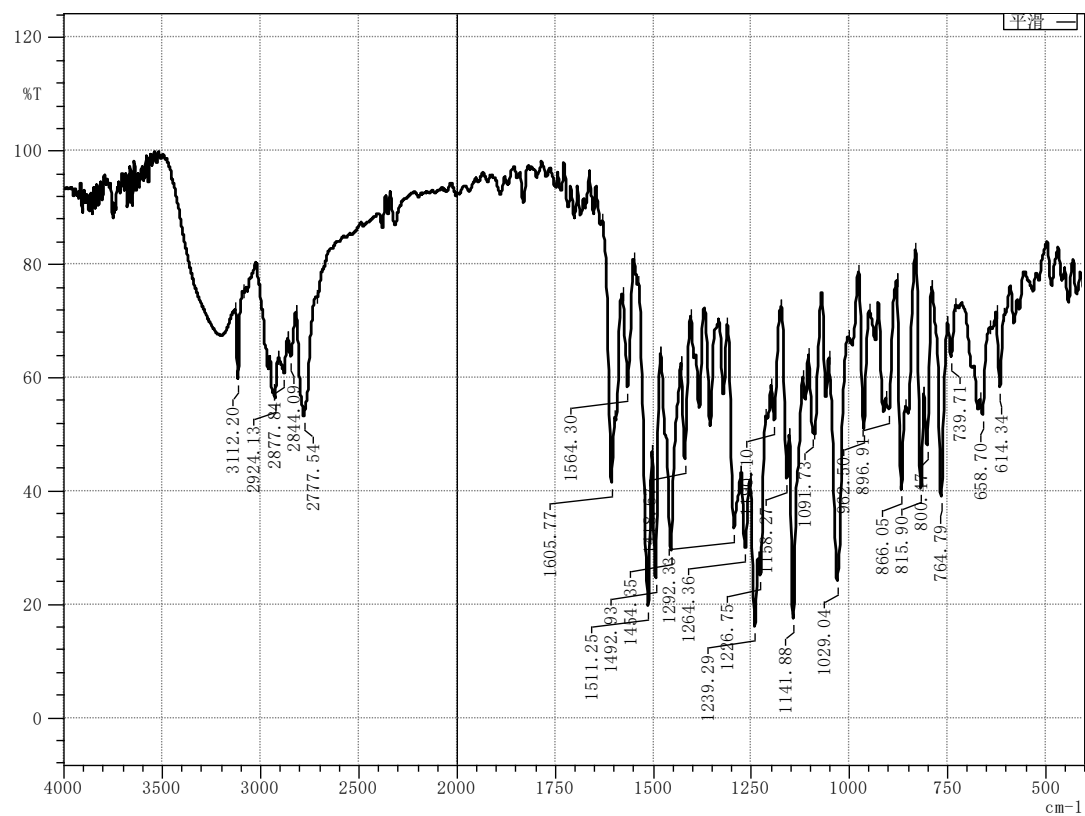

Supplement: s1 [file s1]
